# Supplementary material for: Synthesis and characterisation of an enantiomerically pure scandium pentadienyl complex and its application in the polymerisation of rac-lactide
Source: Royal Society of Chemistry journal article supplement (doi:10.1039/d1dt03920b), 2021-12-21
Supplement: d1dt03920b1.pdf [file d1dt03920b1.pdf]

Electronic Supporting Information (ESI) for

**Synthesis and Characterisation of an Enantiomerically Pure  
Scandium Pentadienyl Complex and its Application in the  
Polymerisation of *rac*-Lactide**

Katharina Münster, Jan Raeder and Marc D. Walter\*

**Table of Contents**

|                                                  |     |
|--------------------------------------------------|-----|
| 1. Crystallographic details for complex <b>2</b> | S2  |
| 2. NMR spectroscopy                              | S10 |
| 3. Kinetic studies                               | S48 |
| 4. Gel permeation chromatography                 | S56 |
| 5. Differential scanning calorimetry             | S62 |
| 6. References                                    | S65 |

## 1. Crystallographic details for complex 2

Table S1. Crystallographic details of scandium complex 2.

|                                                                                       | <b>2</b>                                             |
|---------------------------------------------------------------------------------------|------------------------------------------------------|
| Chemical formula                                                                      | C <sub>27</sub> H <sub>52</sub> ONSi <sub>2</sub> Sc |
| Formula mass                                                                          | 507.83                                               |
| Crystal system                                                                        | orthorhombic                                         |
| <i>a</i> /Å                                                                           | 10.2101(2)                                           |
| <i>b</i> /Å                                                                           | 13.2214(2)                                           |
| <i>c</i> /Å                                                                           | 22.7451(4)                                           |
| $\alpha$ /°                                                                           | 90                                                   |
| $\beta$ /°                                                                            | 90                                                   |
| $\gamma$ /°                                                                           | 90                                                   |
| Unit cell volume/Å <sup>3</sup>                                                       | 3070.40(9)                                           |
| Temperature/K                                                                         | 100(2)                                               |
| Space group                                                                           | P2 <sub>1</sub> 2 <sub>1</sub> 2 <sub>1</sub>        |
| No. of formula units per unit cell, Z                                                 | 4                                                    |
| Radiation type                                                                        | Cu K $\alpha$                                        |
| Absorption coefficient, $\mu$ /mm <sup>-1</sup>                                       | 2.915                                                |
| No. of reflections measured                                                           | 35213                                                |
| No. of independent reflections                                                        | 6316                                                 |
| <i>R</i> <sub>int</sub>                                                               | 0.0575                                               |
| Final <i>R</i> <sub>1</sub> value ( <i>I</i> > 2 $\sigma$ ( <i>I</i> ))               | 0.0368                                               |
| Final <i>wR</i> ( <i>F</i> <sup>2</sup> ) value ( <i>I</i> > 2 $\sigma$ ( <i>I</i> )) | 0.0945                                               |
| Final <i>R</i> <sub>1</sub> value (all data)                                          | 0.0401                                               |
| Final <i>wR</i> ( <i>F</i> <sup>2</sup> ) value (all data)                            | 0.0963                                               |
| Goodness of fit on <i>F</i> <sup>2</sup>                                              | 1.066                                                |
| Flack parameter                                                                       | -0.006(4)                                            |
| $\Delta\rho$ / e Å <sup>-3</sup>                                                      | 0.48 / -0.42                                         |

## 2. NMR spectroscopy

### 2.1. [Sc-pdl\*SiMe<sub>2</sub>N<sup>t</sup>Bu-(thf)(CH<sub>2</sub>SiMe<sub>3</sub>)] (**2**)

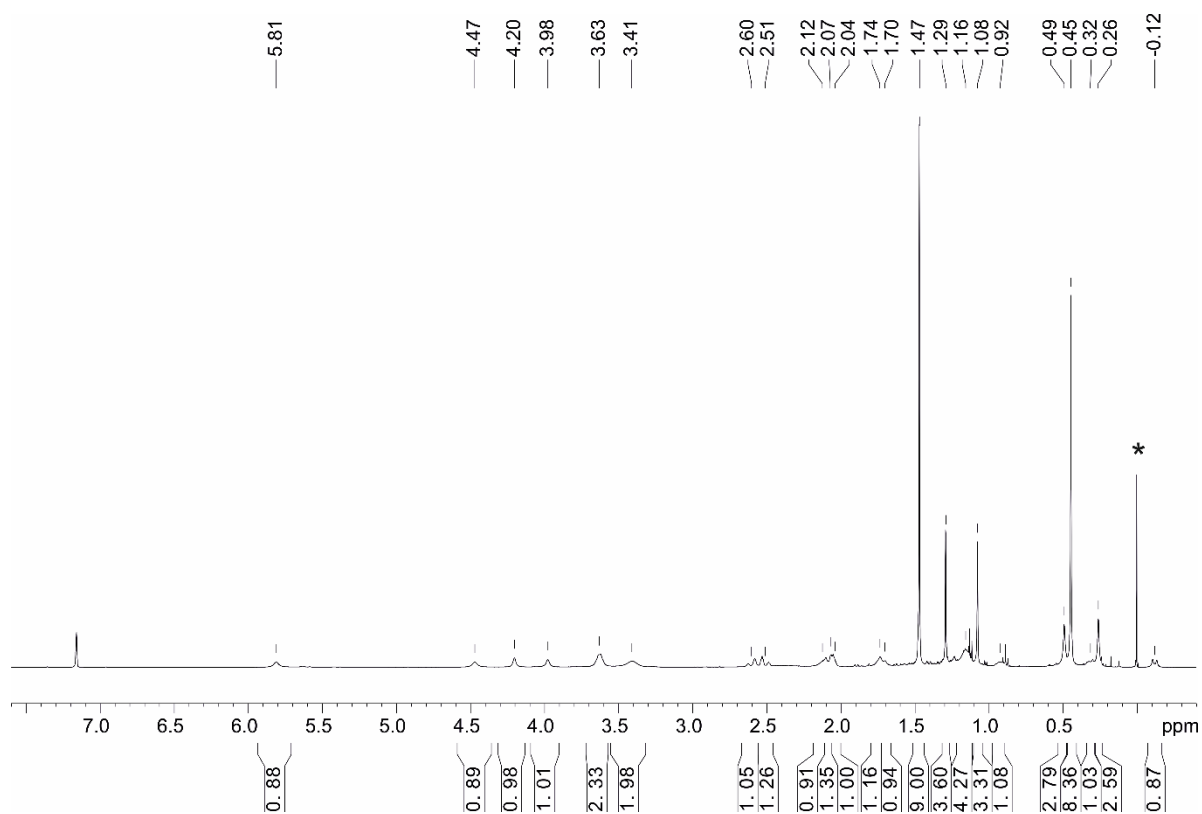

**Figure S1.** <sup>1</sup>H NMR spectrum (400 MHz, C<sub>6</sub>D<sub>6</sub>, 298 K) for **2**. The \* demarks SiMe<sub>4</sub> formed during decomposition of the metal complex.

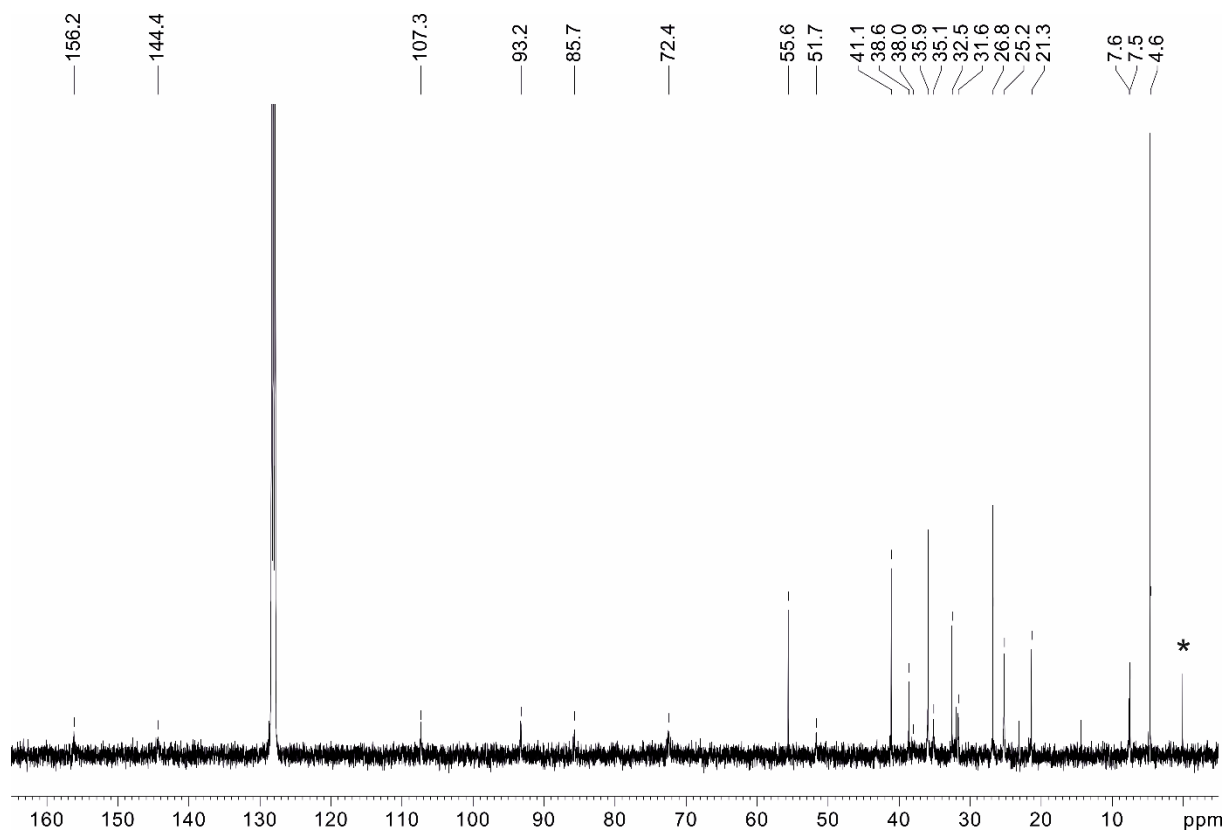

**Figure S2.** <sup>13</sup>C{<sup>1</sup>H} NMR spectrum (101 MHz, C<sub>6</sub>D<sub>6</sub>, 298 K) for **2**. \* Hydrolyzed ligand.

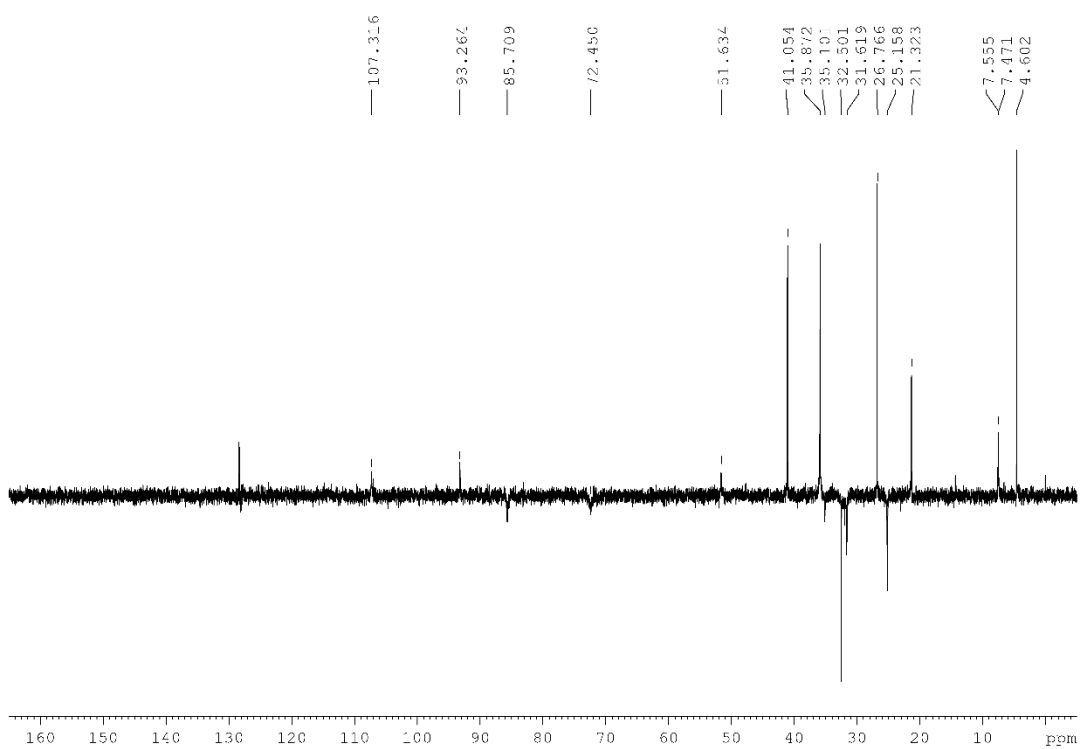

Figure S3.  $^{13}\text{C}\{^1\text{H}\}$  dept NMR spectrum (101 MHz,  $\text{C}_6\text{D}_6$ , 298 K) for **2**.

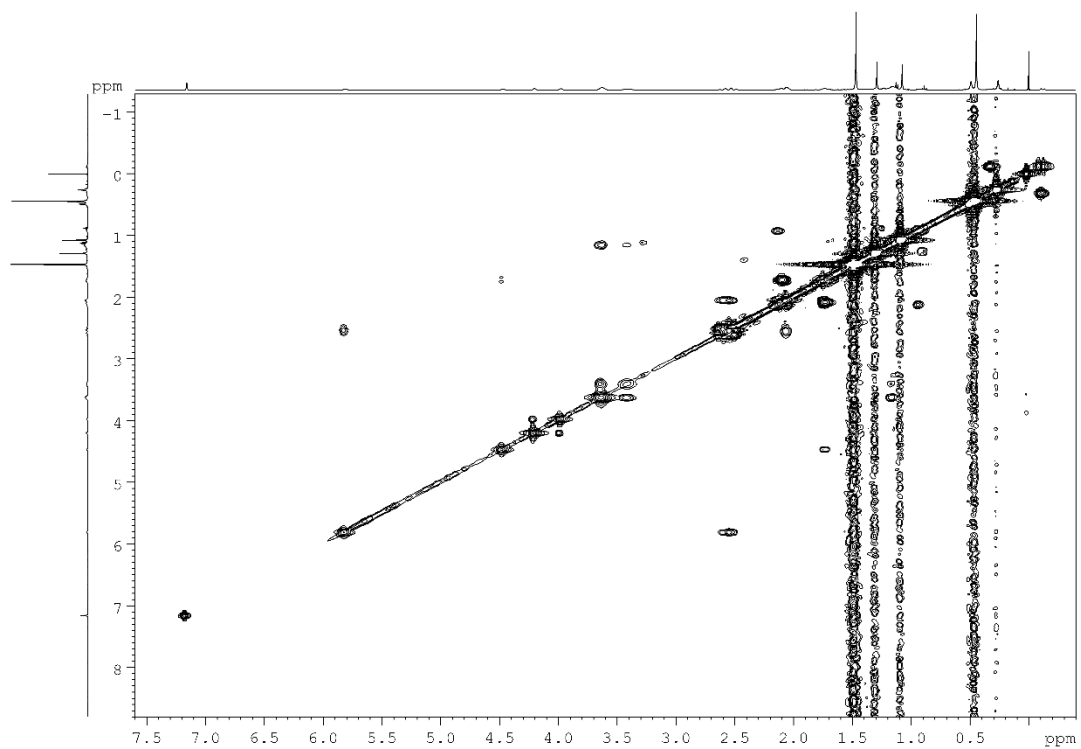

Figure S4.  $^1\text{H},^1\text{H}$  COSY NMR spectrum for **2**.

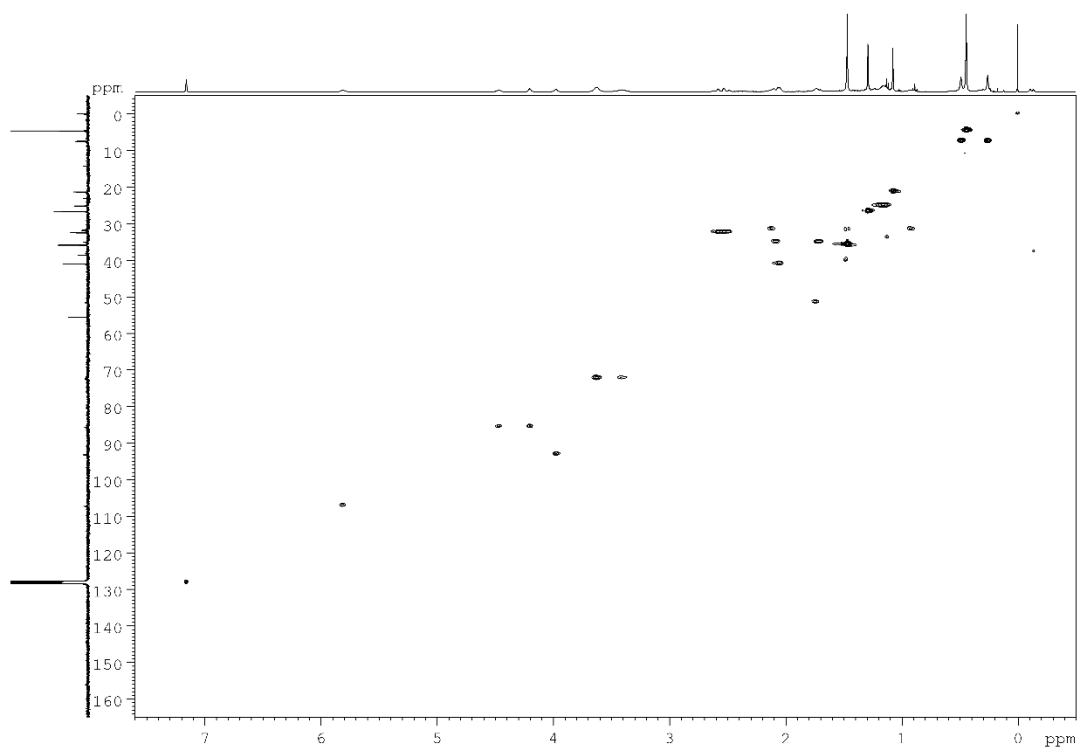

Figure S5.  $^1\text{H},^{13}\text{C}\{^1\text{H}\}$  HSQC NMR spectrum for **2**.

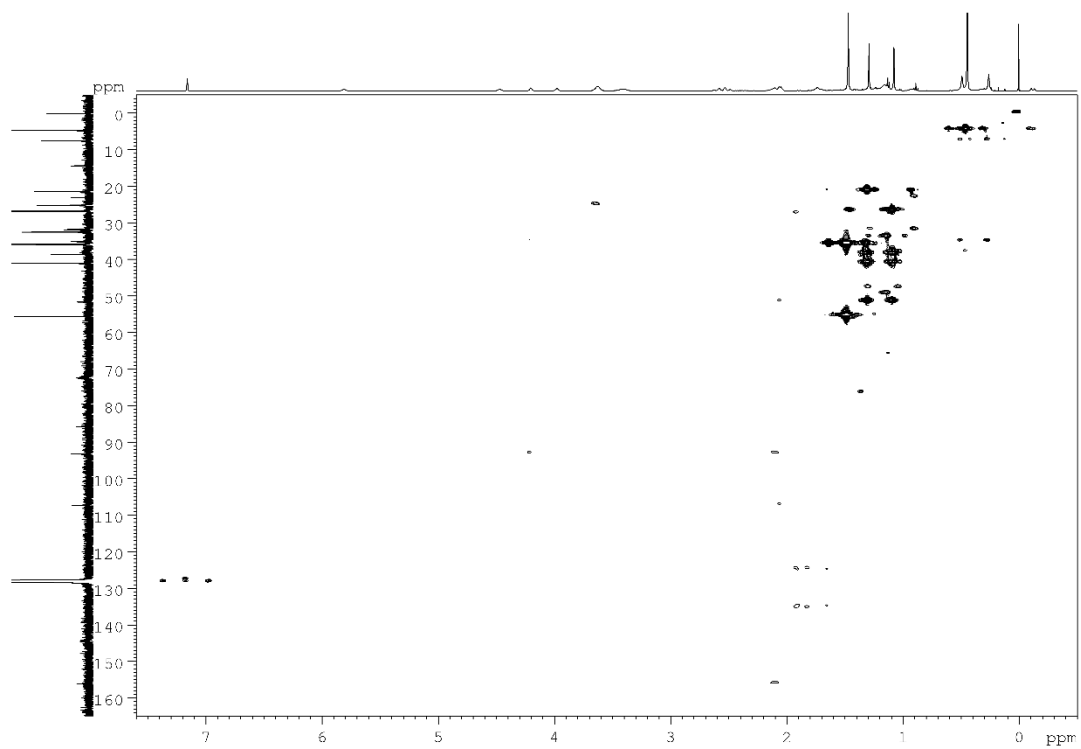

Figure S6.  $^1\text{H},^{13}\text{C}\{^1\text{H}\}$  HMBC NMR spectrum for **2**.

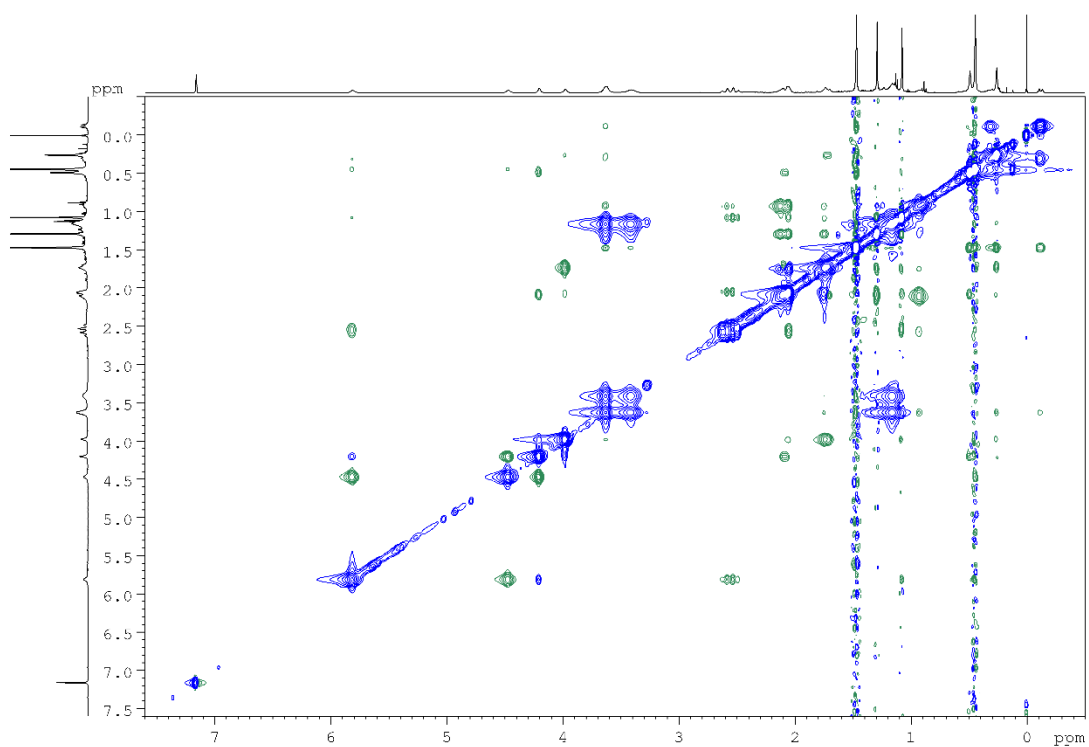

**Figure S7.**  $^1\text{H},^1\text{H}$  NOESY NMR spectrum for **2**.

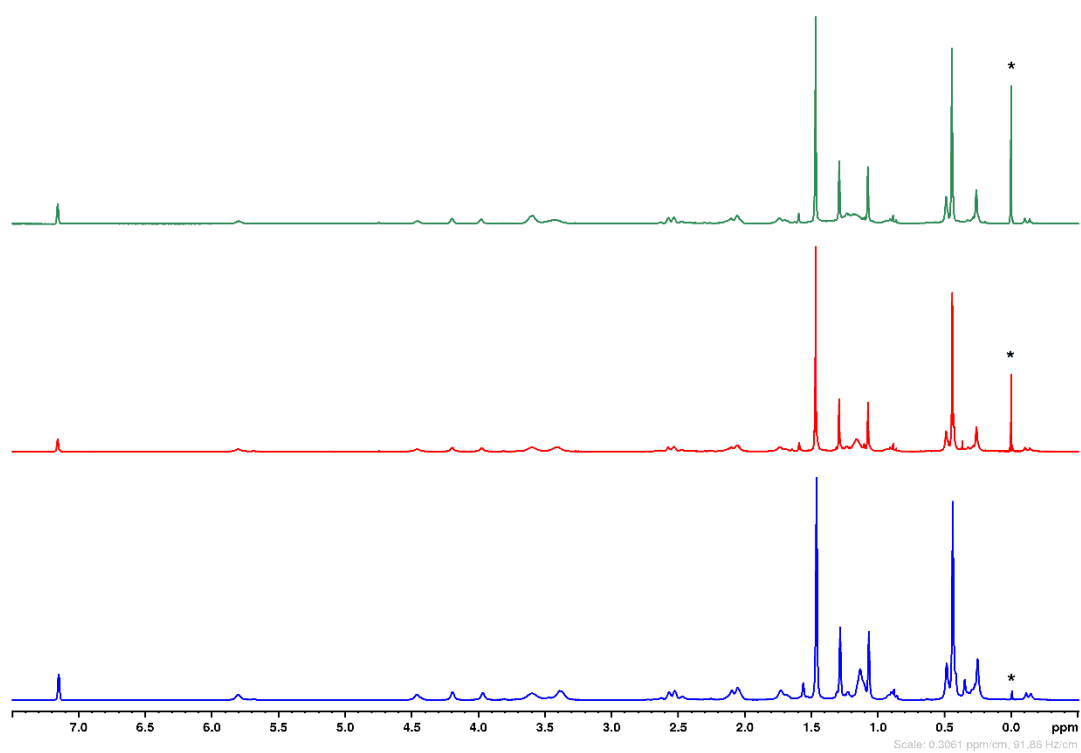

**Figure S8.**  $^1\text{H}$  NMR spectra (300 MHz,  $\text{C}_6\text{D}_6$ ) for **2** (blue) after heating to 60 °C for 1 h (red) and 24 h (green). The \* demarks  $\text{SiMe}_4$  formed during decomposition of the metal complex.

## 2.2. End-group analysis

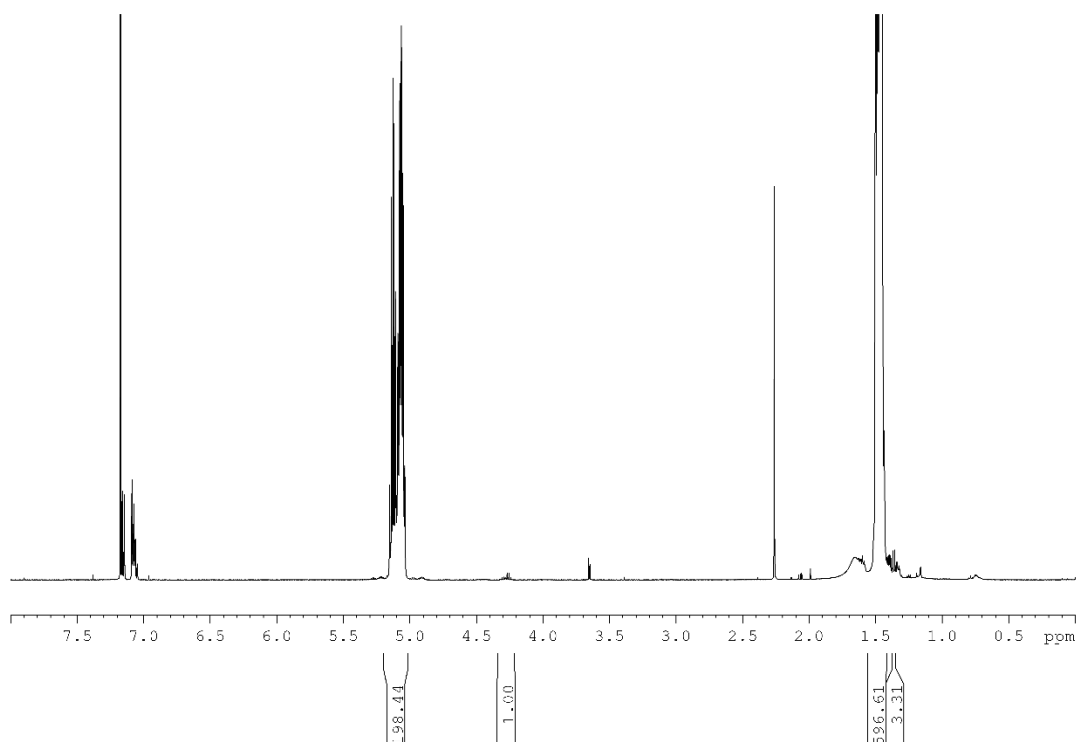

**Figure S9.** <sup>1</sup>H NMR spectrum (300 MHz, CDCl<sub>3</sub>) of poly(lactide) obtained from the polymerisation of *rac*-lactide with 2 at 50 °C.

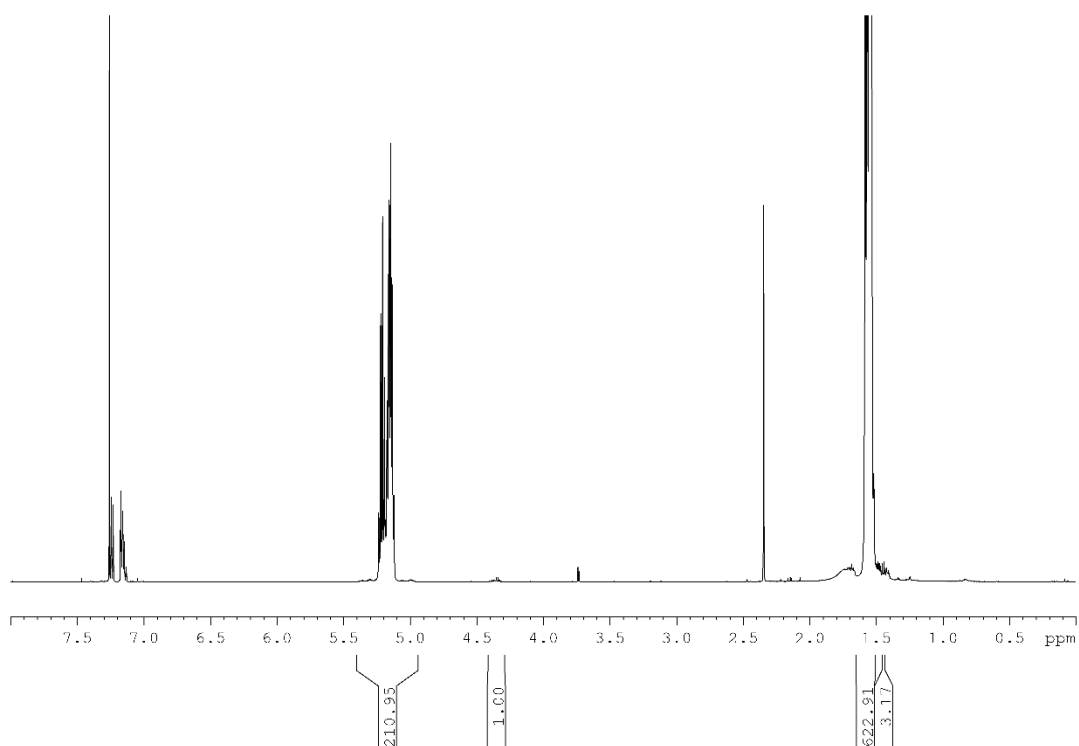

**Figure S10.** <sup>1</sup>H NMR spectrum (300 MHz, CDCl<sub>3</sub>) of poly(lactide) obtained from the polymerisation of *rac*-lactide with 2 at 30 °C.

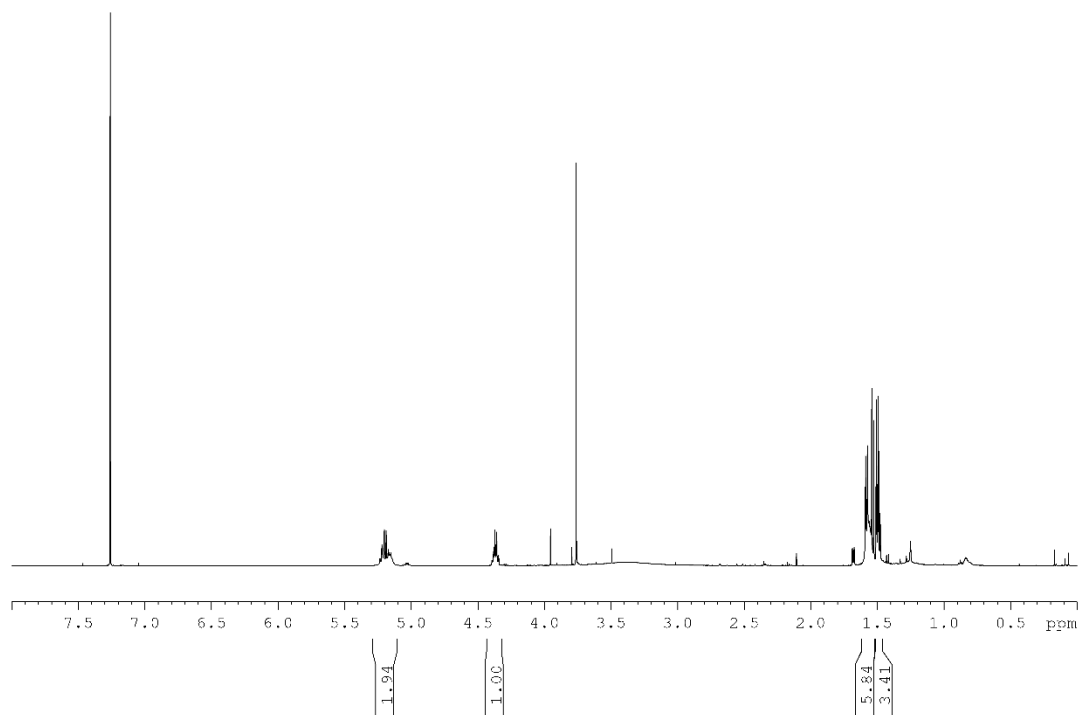

**Figure S11.** <sup>1</sup>H NMR spectrum (300 MHz, CDCl<sub>3</sub>) of poly(lactide) obtained from the polymerisation of *rac*-lactide with **2** at 0 °C.

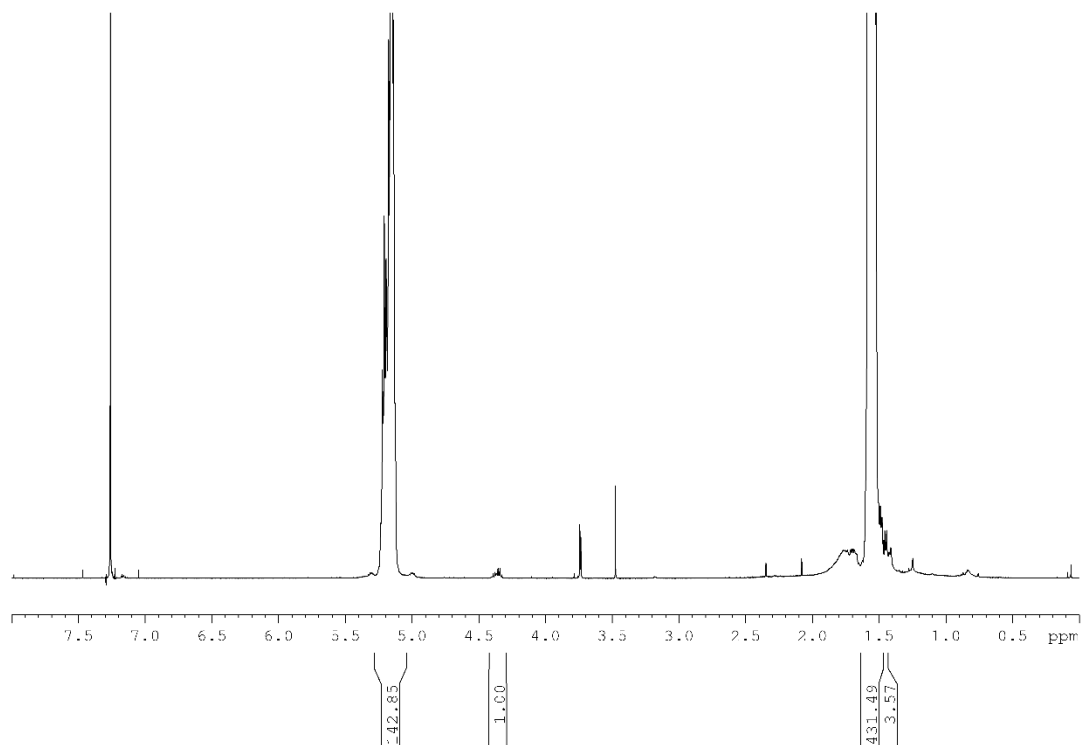

**Figure S12.** <sup>1</sup>H NMR spectrum (300 MHz, CDCl<sub>3</sub>) of poly(lactide) obtained from the polymerisation of *rac*-lactide with **3**.



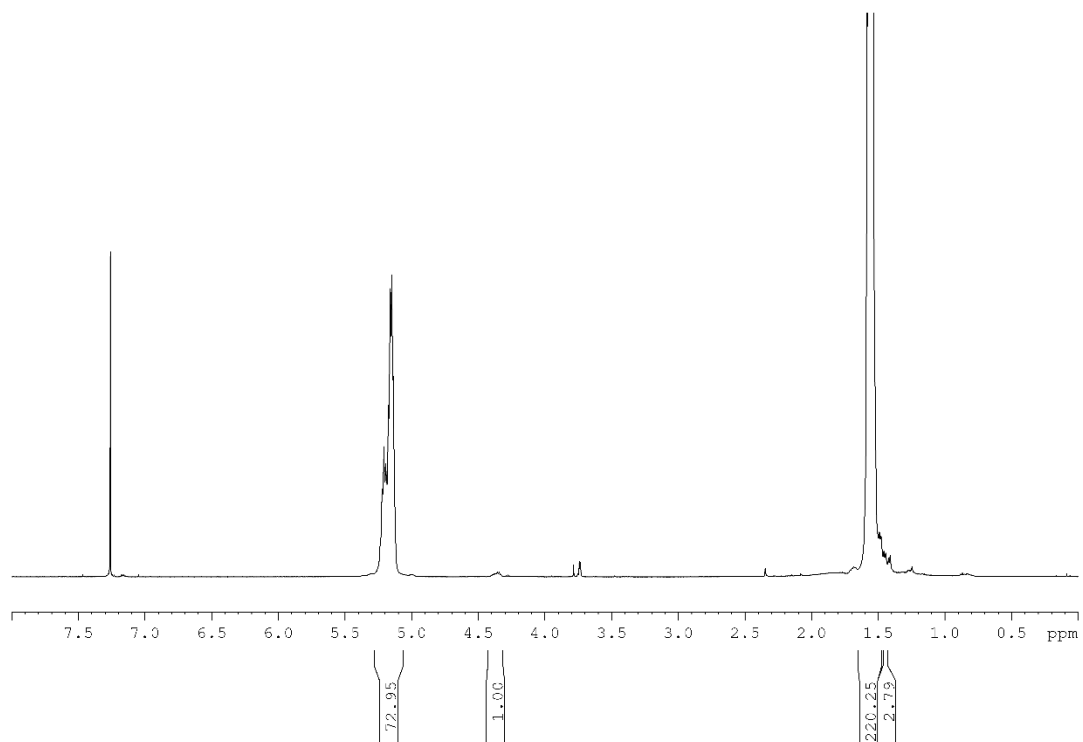

**Figure S13.**  $^1\text{H}$  NMR spectrum (300 MHz,  $\text{CDCl}_3$ ) of poly(lactide) obtained from the polymerisation of *rac*-lactide with 4.

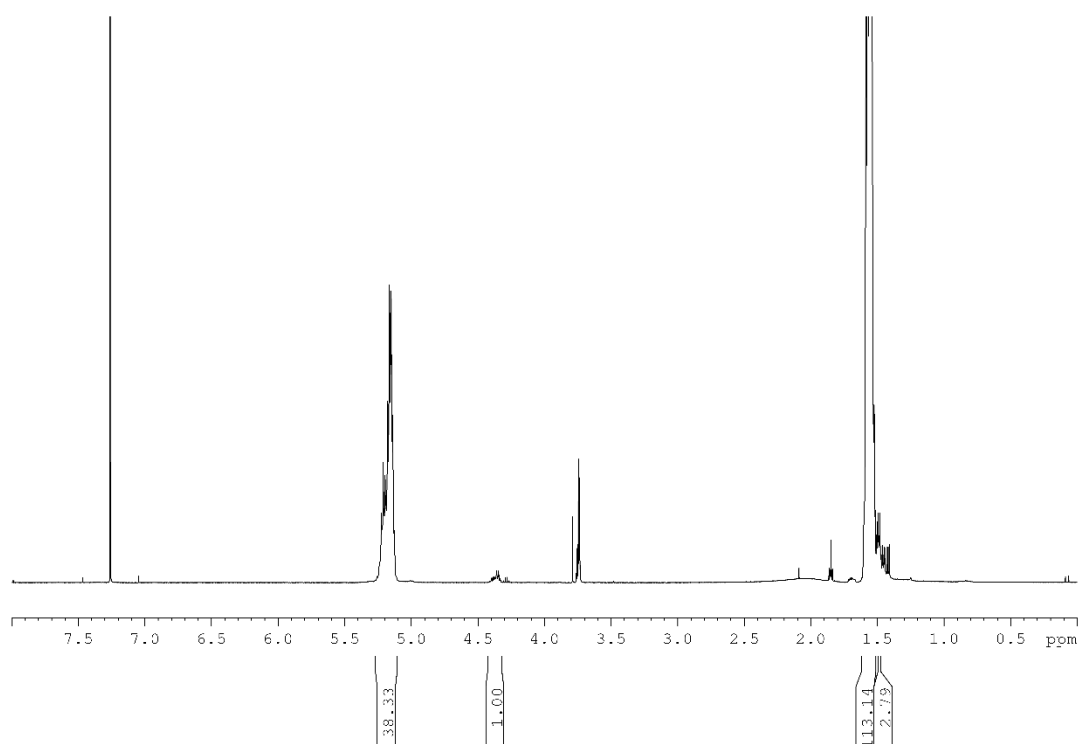

**Figure S14.**  $^1\text{H}$  NMR spectrum (300 MHz,  $\text{CDCl}_3$ ) of poly(lactide) obtained from the polymerisation of *rac*-lactide with 5.

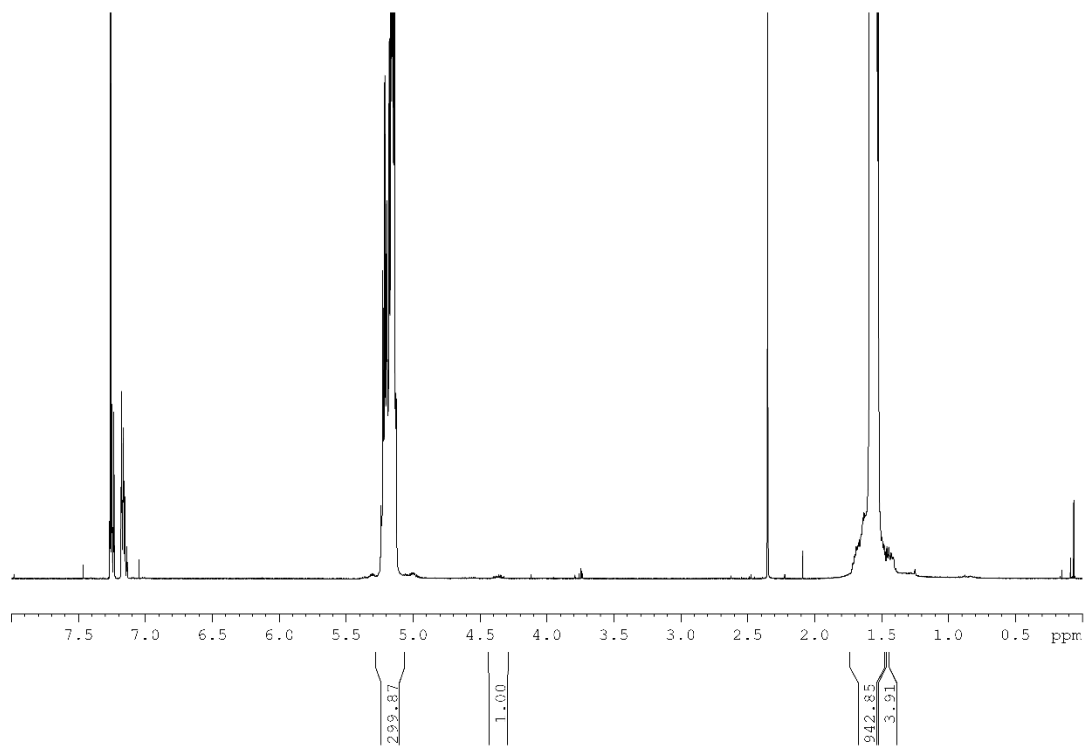

**Figure S15.** <sup>1</sup>H NMR spectrum (300 MHz, CDCl<sub>3</sub>) of poly(lactide) obtained from the polymerisation of *rac*-lactide with **6**.

### 2.3. Calculation of $P_m$ values

For the polymerisation of *rac*-lactide, only five possible tetrad sequences relevant for NMR analysis arise: *mmm*, *mrm*, *rrm*, *rmr* and *mrm*. As long as no epimerization takes place, it is not possible to find tetrads with two adjacent *r* diads, because the ring opening of (*R,R*)- or (*S,S*)-lactide always yields a *m* diad; consequently, every (*R,S*) or (*S,R*) combination must be enclosed by (*R,R*) or (*S,S*) stereoblocks, or in other words, by an *m* diad. The opposite situation arises for PLA obtained from *meso*-lactide, as the ring opening generates an *r* diad with (*S,R*) or (*R,S*) configuration. As a result, a tetrad can never contain two adjacent *m* diads. The five tetrad sequences causing distinguishable NMR resonances consequently are *rrr*, *mrr*, *rrm*, *rmr* and *mrm*.

Application of Bernoullian statistics to the polymerisation of *rac*-lactide yields the values  $P_m$  and  $P_r$  referring to the probabilities of forming *m* or *r* diads, respectively.<sup>1,2</sup>

$$P_{mmm} = \frac{P_m(P_m + 1)}{2} \quad (1a)$$

$$P_{mrm} = \frac{(1 - P_m)}{2} \quad (2a)$$

$$P_{mmr} = \frac{P_m(1 - P_m)}{2} \quad (3)$$

$$P_{rmm} = \frac{P_m(1 - P_m)}{2} \quad (4)$$

$$P_{rmr} = \frac{(1 - P_m)^2}{2} \quad (5)$$

$$P_m + P_r = 1 \quad (6)$$

$P_{mmm}$ ,  $P_{mrm}$ ,  $P_{mmr}$ ,  $P_{rmm}$  and  $P_{rmr}$  are obtained from the homodecoupled  $^1\text{H}\{^1\text{H}\}$  NMR spectra of the PLA samples as the relative peak areas determined by deconvolution of the multiplets observed in the methine region.  $P_m$  values are calculated according to the equations (1d) and (2b) resulting from the Bernoullian statistics<sup>1</sup> based on the  $P_{mmm}$  and  $P_{mrm}$  tetrads:

$$P_{mmm} = \frac{P_m(P_m + 1)}{2} = \frac{P_m^2 + P_m}{2} \quad (1b)$$

$$0 = P_m^2 + P_m - 2P_{mmm} \quad (1c)$$

$$P_{m_{1,2}} = -\frac{1}{2} \pm \sqrt{\left(\frac{1}{2}\right)^2 + 2P_{mmm}} \quad (1d)$$

$$P_m = 1 - 2P_{mrm} \quad (2b)$$

The tetrad probabilities for a completely random polymerisation of *rac*-lactide in the absence of racemization and transesterification processes:

$$P_{mmm} = 0.375 \quad P_{mrm} = 0.250 \quad P_{mmr} = 0.125 \quad P_{rmm} = 0.125 \quad P_{rmr} = 0.125$$

The following pages show the methine regions of the  $^1\text{H}\{^1\text{H}\}$  and  $^{13}\text{C}\{^1\text{H}\}$  NMR spectra together with the deconvolution results. The Tables S2, S3, S4, S5, S6, S7 and S8 display the relative areas from the deconvolution of the  $^1\text{H}\{^1\text{H}\}$  NMR spectra for the tetrads *rrr*, *rmm/mmr*, *mmr/rmm*, *mmm*, *mrm* and a signal at 5.19 ppm which was sometimes observed at 5.19 ppm, but could not be assigned to a tetrad (first row of the tables). However, the resonance was occasionally reported in literature without any further explanation or assignment.<sup>3</sup> The signal was included into the deconvolution of the multiplet in the methine region for the determination of the  $P_m$  values; however, due to its low intensity, incorporating it or not into the calculation has negligible impact on the resulting  $P_m$  value. The resonances for the *rmm* and *mmr* tetrads cannot be distinguished, but display identical values based on the Bernoullian statistics.

To detect transesterification in *rac*-lactide polymerisation, the three tetrads missing in the case of polylactide without any transesterification reactions are *rrr*, *rrm* and *mrr*. They are most conveniently identified in the  $^{13}\text{C}\{^1\text{H}\}$  NMR spectra. The NMR resonances were assigned according to literature.<sup>3,4</sup> As the *mrm* tetrad can be assigned in both  $^1\text{H}$  and  $^{13}\text{C}\{^1\text{H}\}$  NMR, the relative intensities normalized to one for all tetrads were calculated by setting the values for the *mrm* tetrad equal (second and third row of the tables). The  $P_m$  values were calculated from the *mmm* and *mrm* tetrads and averaged (fourth row of the tables and below).

## 2.4. $^1\text{H}\{^1\text{H}\}$ and $^{13}\text{C}\{^1\text{H}\}$ NMR spectra and deconvolution results

### 2.4.1. Polymerisation of *rac*-lactide with compound **2** at 50 °C

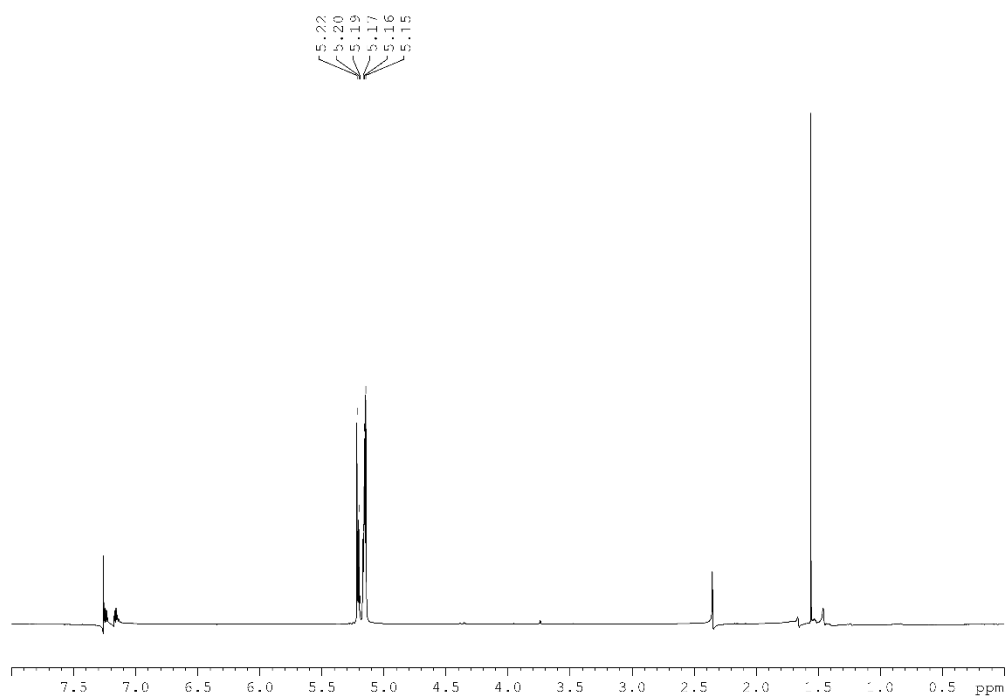

**Figure S16.** Homodecoupled  $^1\text{H}\{^1\text{H}\}$  NMR spectrum (500 MHz,  $\text{CDCl}_3$ ) of poly(lactide) obtained from the polymerisation of *rac*-lactide with **2** at 50 °C.

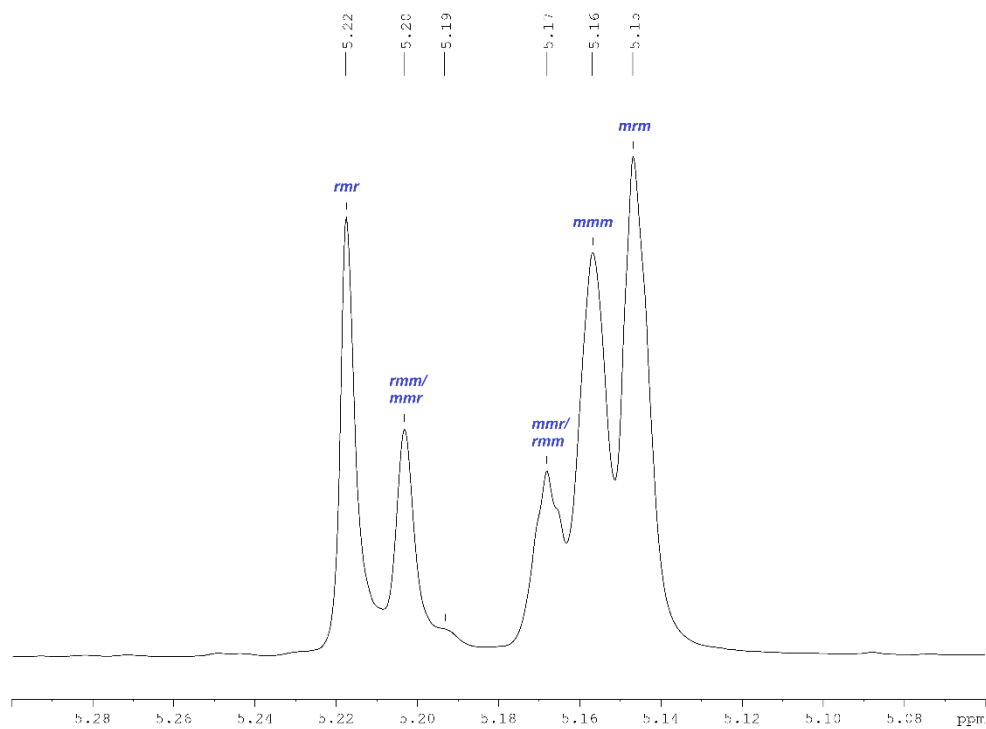

**Figure S17.** Methine region of the homodecoupled  $^1\text{H}\{^1\text{H}\}$  NMR spectrum (500 MHz,  $\text{CDCl}_3$ ) of poly(lactide) obtained from the polymerisation of *rac*-lactide with **2** at 50 °C.

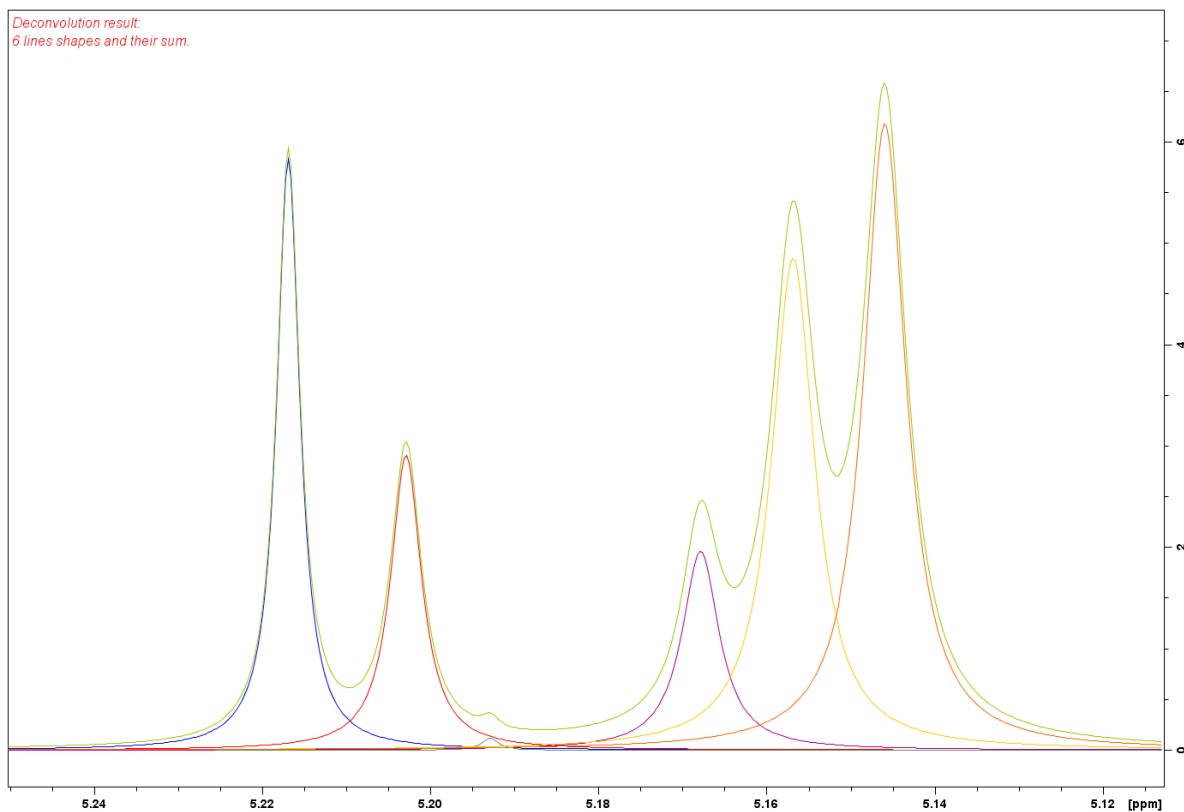

**Figure S18.** Deconvolution of the homodecoupled  $^1\text{H}\{^1\text{H}\}$  NMR spectrum (500 MHz,  $\text{CDCl}_3$ ) of poly(lactide) obtained from the polymerisation of *rac*-lactide with **2** at 50 °C.

| Fit      | Frequency |         | Width   |       | Intensity |         | Area   | %Lor.<br>chisq |
|----------|-----------|---------|---------|-------|-----------|---------|--------|----------------|
|          | ppm       | Hz      | ppm     | Hz    | Hz        |         |        |                |
| <b>1</b> |           |         |         |       |           |         |        | <b>9.1e+15</b> |
|          | 5.217     | 3131.11 | 0.00333 | 2.000 | 5.835     | 99.944  | 100.00 |                |
| STD:     | 0.000     | 0.02    | 0.00009 | 0.055 | 0.111     |         |        |                |
|          | 5.203     | 3122.60 | 0.00443 | 2.660 | 2.911     | 66.305  | 100.00 |                |
| STD:     | 0.000     | 0.04    | 0.00022 | 0.133 | 0.097     |         |        |                |
|          | 5.193     | 3116.50 | 0.00242 | 1.449 | 0.119     | 1.476   | 100.00 |                |
| STD:     | 0.001     | 0.80    | 0.00390 | 2.342 | 0.130     |         |        |                |
|          | 5.168     | 3101.71 | 0.00537 | 3.224 | 1.962     | 54.177  | 100.00 |                |
| STD:     | 0.000     | 0.07    | 0.00039 | 0.236 | 0.088     |         |        |                |
|          | 5.157     | 3094.92 | 0.00625 | 3.752 | 4.854     | 155.983 | 100.00 |                |
| STD:     | 0.000     | 0.03    | 0.00021 | 0.124 | 0.082     |         |        |                |
|          | 5.146     | 3088.48 | 0.00614 | 3.683 | 6.183     | 195.012 | 100.00 |                |
| STD:     | 0.000     | 0.03    | 0.00014 | 0.084 | 0.083     |         |        |                |

**Figure S19.**  $^1\text{H}\{^1\text{H}\}$  NMR deconvolution results. Fit type: Mixed Lorentzian and Gaussian.

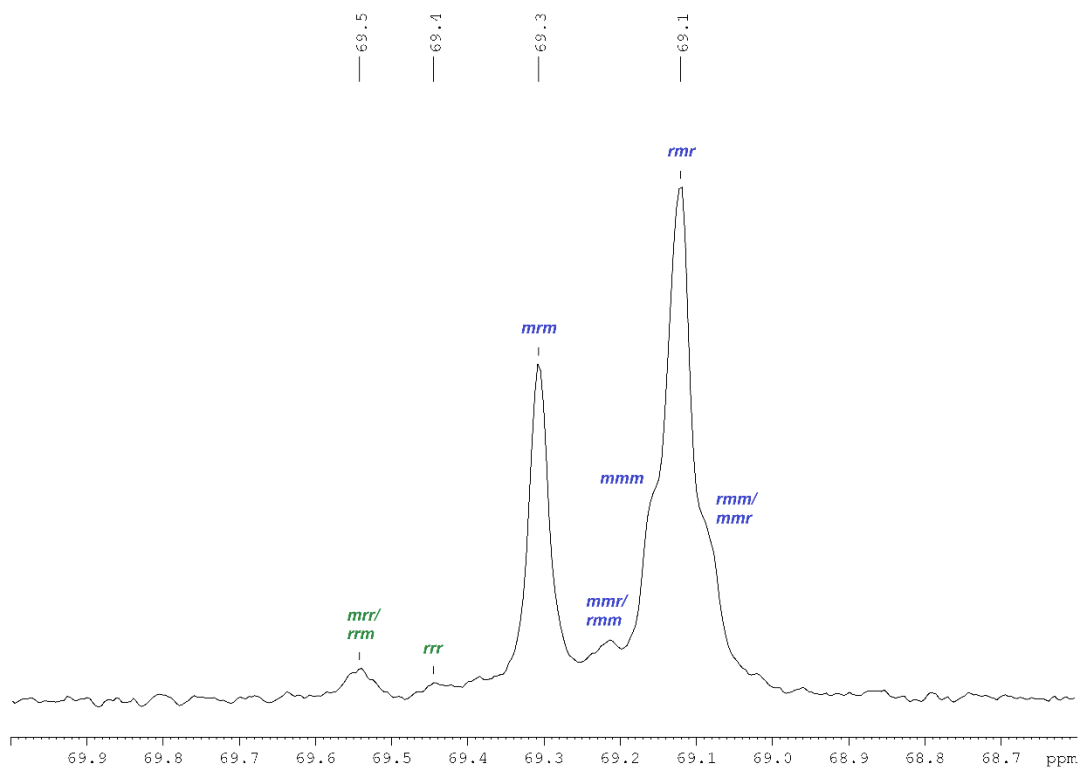

**Figure S20.** Methine region of the  $^{13}\text{C}\{^1\text{H}\}$  NMR (126 MHz,  $\text{CDCl}_3$ ) of poly(lactide) obtained from the polymerisation of *rac*-lactide with **2** at 50 °C.

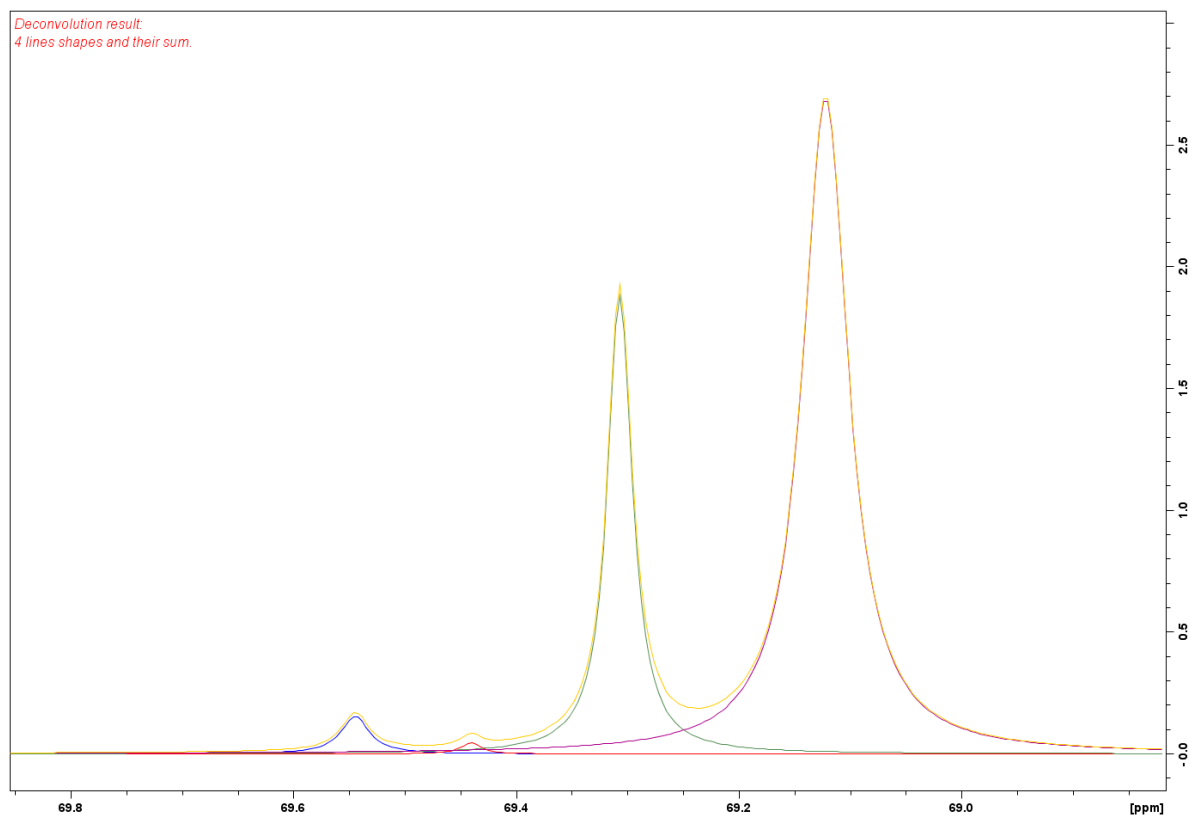

**Figure S21.** Deconvolution of the methine region of the  $^{13}\text{C}\{^1\text{H}\}$  NMR (126 MHz,  $\text{CDCl}_3$ ) of poly(lactide) obtained from the polymerisation of *rac*-lactide with **2** at 50 °C.

| Fit         | Frequency     |                | Width          |              | Intensity    | Area          | %Lor.<br>chisq |
|-------------|---------------|----------------|----------------|--------------|--------------|---------------|----------------|
|             | ppm           | Hz             | ppm            | Hz           |              |               |                |
| <b>1</b>    |               |                |                |              |              |               | <b>6.4e+14</b> |
|             | <b>69.546</b> | <b>8749.23</b> | <b>0.03086</b> | <b>3.883</b> | <b>0.154</b> | <b>1.966</b>  | <b>100.00</b>  |
| <b>STD:</b> | <b>0.005</b>  | <b>0.63</b>    | <b>0.01487</b> | <b>1.871</b> | <b>0.050</b> |               |                |
|             | <b>69.442</b> | <b>8736.13</b> | <b>0.02157</b> | <b>2.713</b> | <b>0.047</b> | <b>0.418</b>  | <b>100.00</b>  |
| <b>STD:</b> | <b>0.014</b>  | <b>1.71</b>    | <b>0.03933</b> | <b>4.948</b> | <b>0.059</b> |               |                |
|             | <b>69.309</b> | <b>8719.42</b> | <b>0.02697</b> | <b>3.393</b> | <b>1.881</b> | <b>21.032</b> | <b>100.00</b>  |
| <b>STD:</b> | <b>0.000</b>  | <b>0.05</b>    | <b>0.00108</b> | <b>0.136</b> | <b>0.053</b> |               |                |
|             | <b>69.125</b> | <b>8696.37</b> | <b>0.04926</b> | <b>6.197</b> | <b>2.695</b> | <b>55.020</b> | <b>100.00</b>  |
| <b>STD:</b> | <b>0.000</b>  | <b>0.04</b>    | <b>0.00105</b> | <b>0.132</b> | <b>0.039</b> |               |                |

Figure S22. <sup>13</sup>C{<sup>1</sup>H} NMR deconvolution results. Fit type: Mixed Lorentzian and Gaussian.



**Table S2.** Tetrad intensities derived from the  $^1\text{H}\{^1\text{H}\}$  and  $^{13}\text{C}\{^1\text{H}\}$  NMR spectra.

|                                                                                                                                                                                                                                                             | $P_{rmr}$           | $P_{rmm/mmr}$       | $\delta = 5.19$ ppm | $P_{mmr/rmm}$       | $P_{mmm}$            | $P_{mrm}$            | $P_{rrr}$          | $P_{rrm}$          | $P_{mrm}$           |
|-------------------------------------------------------------------------------------------------------------------------------------------------------------------------------------------------------------------------------------------------------------|---------------------|---------------------|---------------------|---------------------|----------------------|----------------------|--------------------|--------------------|---------------------|
| <b>Area from deconvolution (<math>^1\text{H}</math> or <math>^{13}\text{C}\{^1\text{H}\}</math> NMR)</b>                                                                                                                                                    | 99.944 <sup>a</sup> | 66.305 <sup>a</sup> | 1.476 <sup>a</sup>  | 54.177 <sup>a</sup> | 155.983 <sup>a</sup> | 195.012 <sup>a</sup> | 0.418 <sup>b</sup> | 1.996 <sup>b</sup> | 21.032 <sup>b</sup> |
| <b>Intensity in <math>^1\text{H}</math> NMR (normalized) and relative intensity in <math>^{13}\text{C}\{^1\text{H}\}</math> NMR (by equating <math>P_{mrm}</math> values from <math>^1\text{H}</math> and <math>^{13}\text{C}\{^1\text{H}\}</math> NMR)</b> | 0.1745              | 0.1157              | 0.0026              | 0.0946              | 0.2723               | 0.3404               | 0.0068             | 0.0323             | 0.3404              |
| <b>Relative intensities (normalized)</b>                                                                                                                                                                                                                    | 0.16791763          | 0.11133564          | 0.00250192          | 0.09103156          | 0.26202848           | 0.32755966           | 0.00654349         | 0.0310816          |                     |
| $P_m$                                                                                                                                                                                                                                                       |                     |                     |                     |                     | 0.3914               | 0.3192               |                    |                    |                     |

<sup>a</sup> from  $^1\text{H}$  NMR. <sup>b</sup> from  $^{13}\text{C}\{^1\text{H}\}$  NMR.

Average:  $P_m = 0.3553$

## 2.4.2. Polymerisation of *rac*-lactide with compound **2** at 30 °C

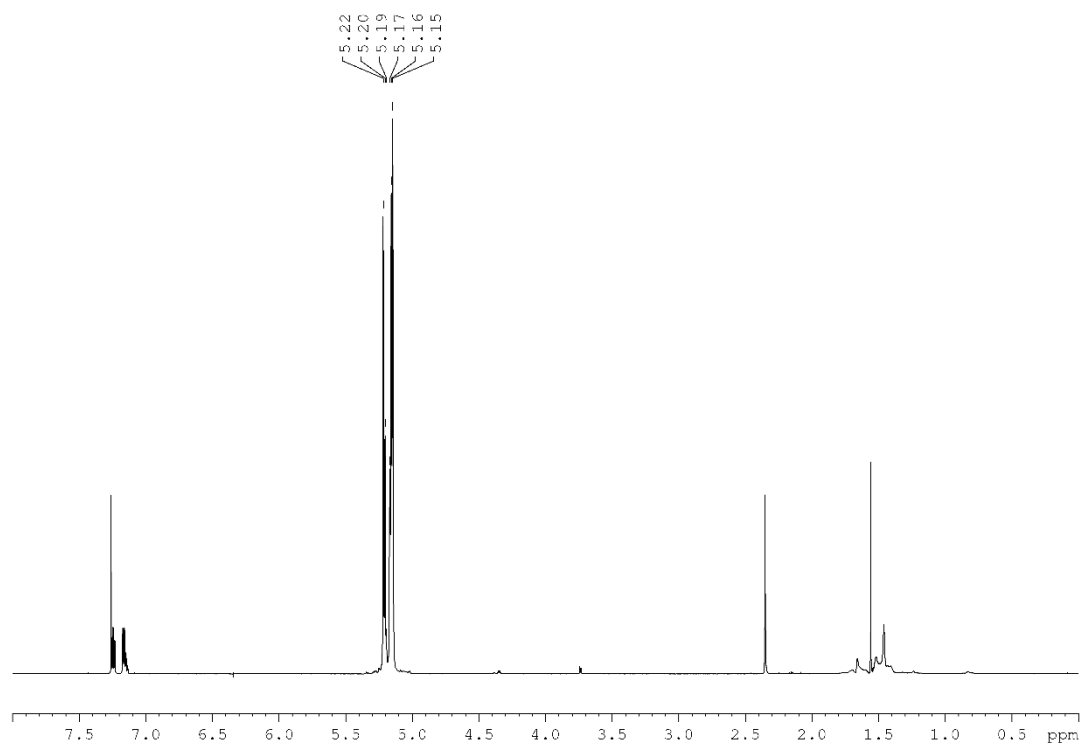

**Figure S23.** Homodecoupled  $^1\text{H}\{^1\text{H}\}$  NMR spectrum (500 MHz,  $\text{CDCl}_3$ ) of poly(lactide) obtained from the polymerisation of *rac*-lactide with **2** at 30 °C.

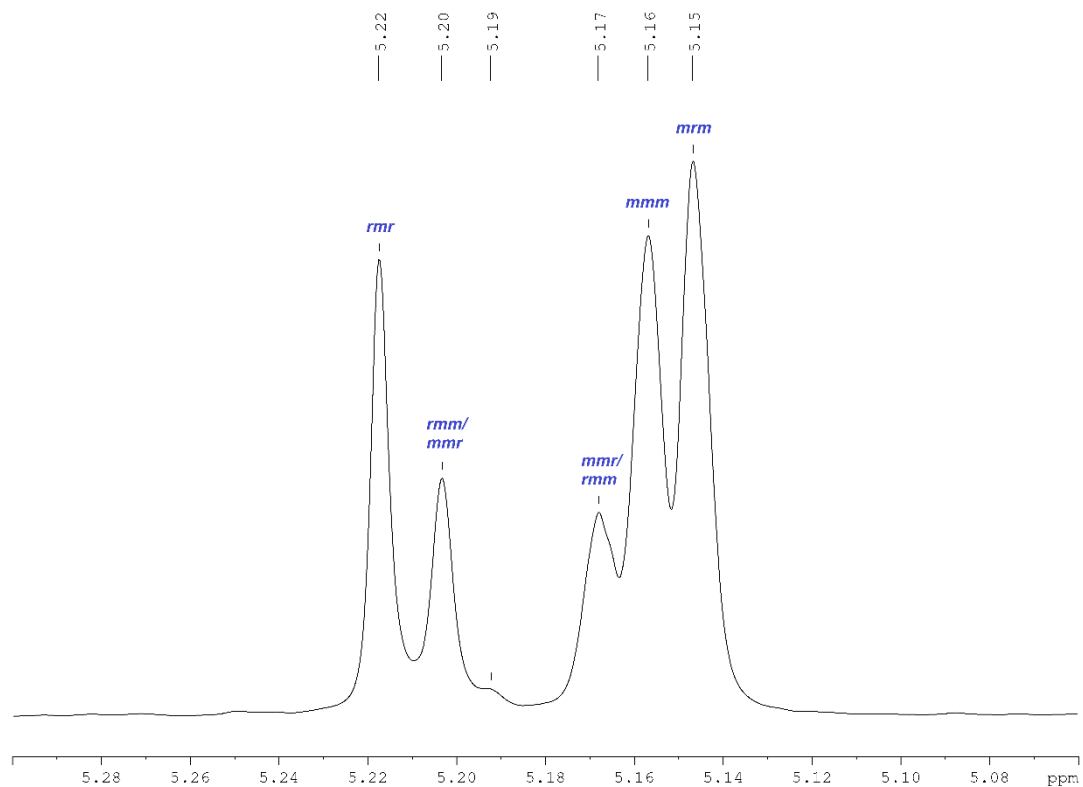

**Figure S24.** Methine region of the homodecoupled  $^1\text{H}\{^1\text{H}\}$  NMR spectrum (500 MHz,  $\text{CDCl}_3$ ) of poly(lactide) obtained from the polymerisation of *rac*-lactide with **2** at 30 °C.

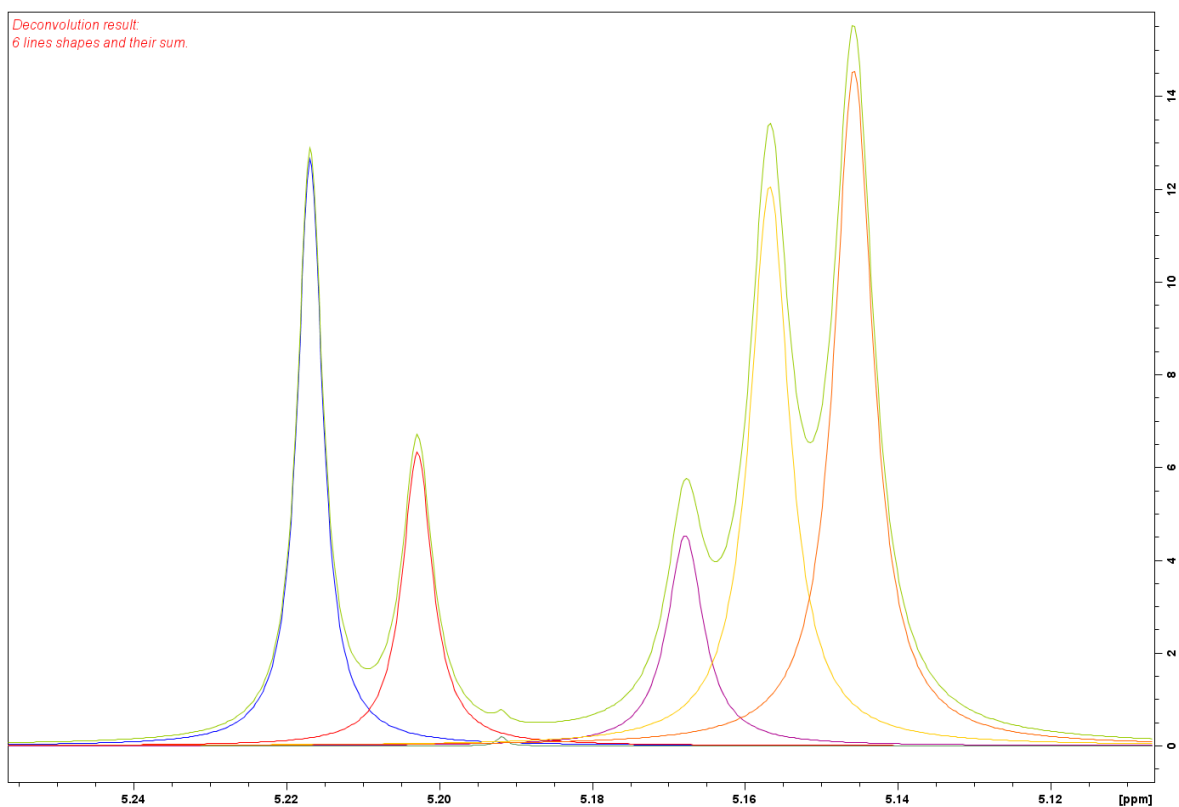

**Figure S25.** Deconvolution of the homodecoupled  $^1\text{H}\{^1\text{H}\}$  NMR spectrum (500 MHz,  $\text{CDCl}_3$ ) of poly(lactide) obtained from the polymerisation of *rac*-lactide with **2** at 30 °C.

**Fit type: Mixed Lorentzian and Gaussian**

| Fit         | Frequency |         | Width   |       | Intensity |         | Area   | %Lor. chisq    |
|-------------|-----------|---------|---------|-------|-----------|---------|--------|----------------|
|             | ppm       | Hz      | ppm     | Hz    | Hz        | Hz      |        |                |
| <b>1</b>    |           |         |         |       |           |         |        | <b>3.2e+16</b> |
|             | 5.217     | 3131.16 | 0.00395 | 2.373 | 12.661    | 257.293 | 100.00 |                |
| <b>STD:</b> | 0.000     | 0.02    | 0.00010 | 0.058 | 0.210     |         |        |                |
|             | 5.203     | 3122.71 | 0.00474 | 2.847 | 6.338     | 154.563 | 100.00 |                |
| <b>STD:</b> | 0.000     | 0.04    | 0.00022 | 0.129 | 0.192     |         |        |                |
|             | 5.192     | 3116.12 | 0.00163 | 0.980 | 0.199     | 1.673   | 100.00 |                |
| <b>STD:</b> | 0.001     | 0.80    | 0.00385 | 2.310 | 0.325     |         |        |                |
|             | 5.168     | 3101.70 | 0.00568 | 3.407 | 4.538     | 132.405 | 100.00 |                |
| <b>STD:</b> | 0.000     | 0.07    | 0.00036 | 0.218 | 0.176     |         |        |                |
|             | 5.157     | 3095.03 | 0.00623 | 3.739 | 12.057    | 386.134 | 100.00 |                |
| <b>STD:</b> | 0.000     | 0.03    | 0.00017 | 0.104 | 0.169     |         |        |                |
|             | 5.146     | 3088.56 | 0.00615 | 3.690 | 14.562    | 460.288 | 100.00 |                |
| <b>STD:</b> | 0.000     | 0.02    | 0.00012 | 0.073 | 0.170     |         |        |                |

**Figure S26.**  $^1\text{H}\{^1\text{H}\}$  NMR deconvolution results. Fit type: Mixed Lorentzian and Gaussian.

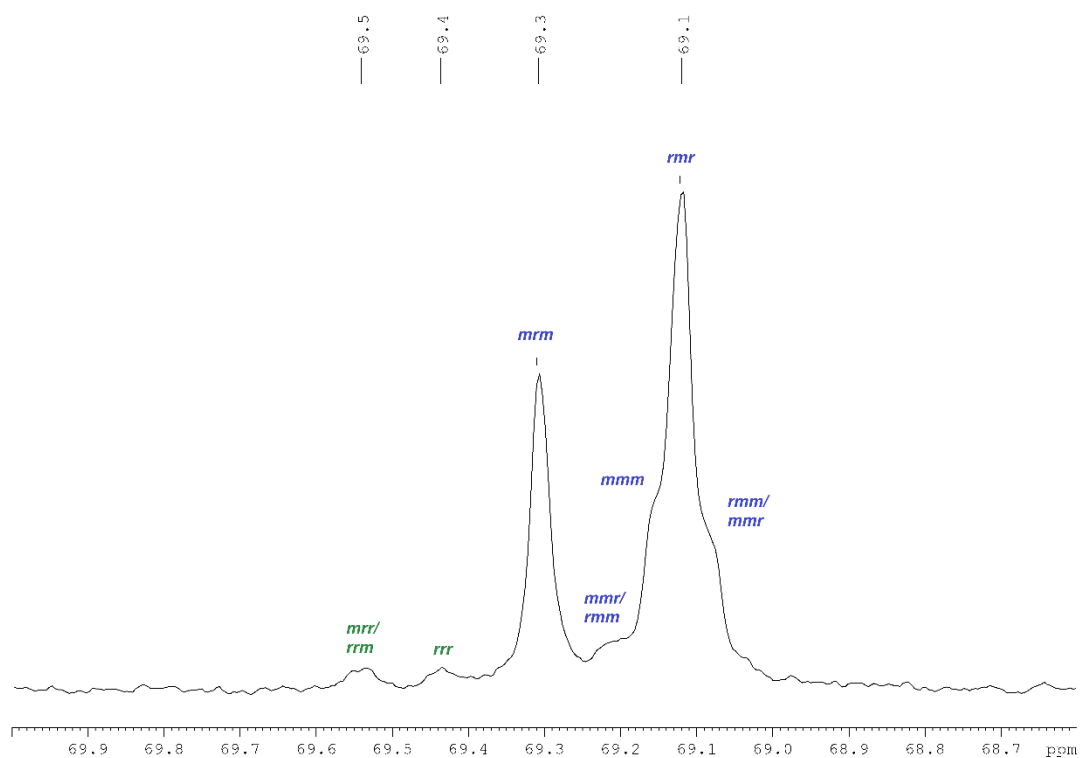

**Figure S27.** Methine region of the  $^{13}\text{C}\{^1\text{H}\}$  NMR (126 MHz,  $\text{CDCl}_3$ ) of poly(lactide) obtained from the polymerisation of *rac*-lactide with **2** at 30 °C.

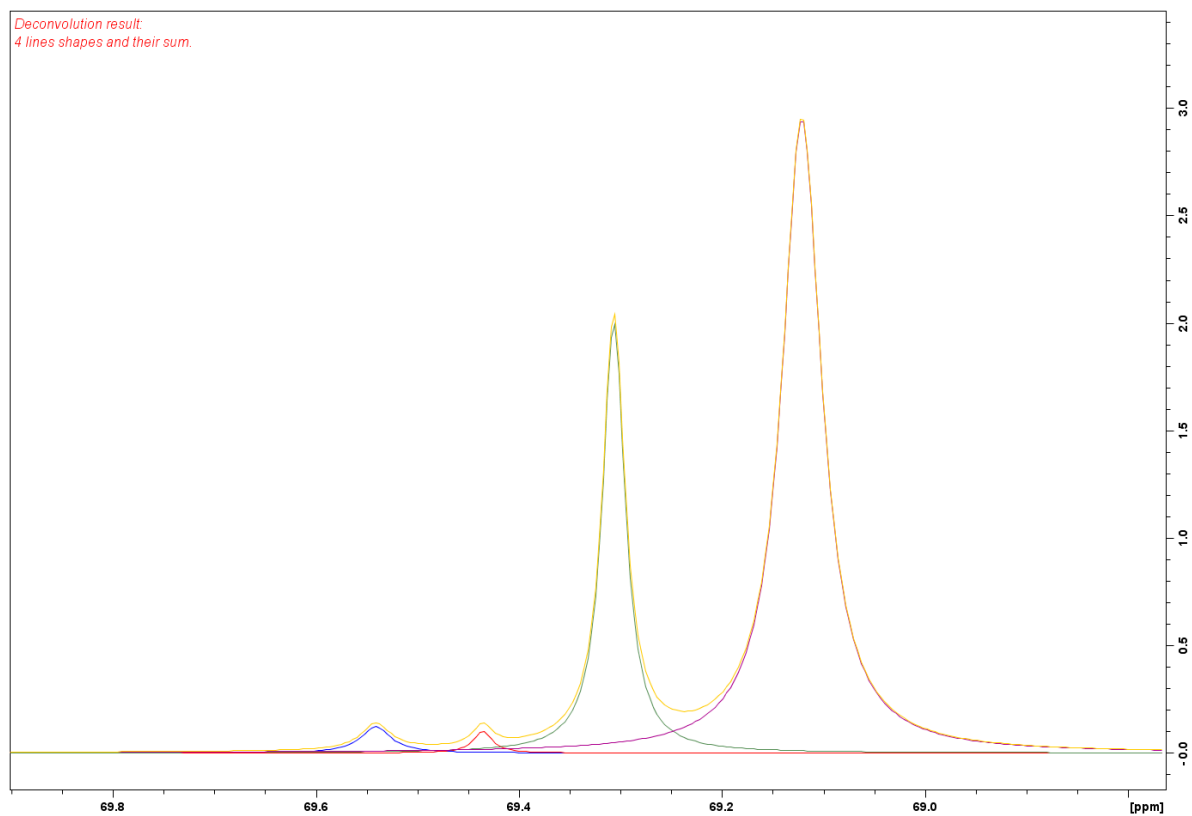

**Figure S28.** Deconvolution of the methine region of the  $^{13}\text{C}\{^1\text{H}\}$  NMR (126 MHz,  $\text{CDCl}_3$ ) of poly(lactide) obtained from the polymerisation of *rac*-lactide with **2** at 30 °C.

| Fit         | Frequency     |                | Width          |              | Intensity    | Area          | %Lor.<br>chisq |
|-------------|---------------|----------------|----------------|--------------|--------------|---------------|----------------|
|             | ppm           | Hz             | ppm            | Hz           |              |               |                |
| <b>1</b>    |               |                |                |              |              |               | <b>7.8e+14</b> |
|             | <b>69.542</b> | <b>8748.83</b> | <b>0.03599</b> | <b>4.528</b> | <b>0.122</b> | <b>1.817</b>  | <b>100.00</b>  |
| <b>STD:</b> | <b>0.008</b>  | <b>1.01</b>    | <b>0.02641</b> | <b>3.323</b> | <b>0.053</b> |               |                |
|             | <b>69.437</b> | <b>8735.56</b> | <b>0.02285</b> | <b>2.875</b> | <b>0.100</b> | <b>0.945</b>  | <b>100.00</b>  |
| <b>STD:</b> | <b>0.007</b>  | <b>0.92</b>    | <b>0.02133</b> | <b>2.684</b> | <b>0.064</b> |               |                |
|             | <b>69.308</b> | <b>8719.32</b> | <b>0.02687</b> | <b>3.381</b> | <b>2.009</b> | <b>22.371</b> | <b>100.00</b>  |
| <b>STD:</b> | <b>0.000</b>  | <b>0.05</b>    | <b>0.00113</b> | <b>0.142</b> | <b>0.059</b> |               |                |
|             | <b>69.123</b> | <b>8696.10</b> | <b>0.04763</b> | <b>5.992</b> | <b>2.955</b> | <b>58.326</b> | <b>100.00</b>  |
| <b>STD:</b> | <b>0.000</b>  | <b>0.04</b>    | <b>0.00104</b> | <b>0.131</b> | <b>0.044</b> |               |                |

Figure S29. <sup>13</sup>C{<sup>1</sup>H} NMR deconvolution results. Fit type: Mixed Lorentzian and Gaussian.

**Table S3.** Tetrad intensities derived from the  $^1\text{H}\{^1\text{H}\}$  and  $^{13}\text{C}\{^1\text{H}\}$  NMR spectra.

|                                                                                                                                                                                                                                                             | $P_{rmr}$            | $P_{rmm/mmr}$        | $\delta = 5.19 \text{ ppm}$ | $P_{mmr/rmm}$        | $P_{mmm}$            | $P_{mrm}$            | $P_{rrr}$          | $P_{rrm}$          | $P_{mrm}$           |
|-------------------------------------------------------------------------------------------------------------------------------------------------------------------------------------------------------------------------------------------------------------|----------------------|----------------------|-----------------------------|----------------------|----------------------|----------------------|--------------------|--------------------|---------------------|
| <b>Area from deconvolution (<math>^1\text{H}</math> or <math>^{13}\text{C}\{^1\text{H}\}</math> NMR)</b>                                                                                                                                                    | 257.293 <sup>a</sup> | 154.563 <sup>a</sup> | 1.673 <sup>a</sup>          | 132.405 <sup>a</sup> | 386.134 <sup>a</sup> | 460.288 <sup>a</sup> | 0.945 <sup>b</sup> | 1.817 <sup>b</sup> | 22.371 <sup>b</sup> |
| <b>Intensity in <math>^1\text{H}</math> NMR (normalized) and relative intensity in <math>^{13}\text{C}\{^1\text{H}\}</math> NMR (by equating <math>P_{mrm}</math> values from <math>^1\text{H}</math> and <math>^{13}\text{C}\{^1\text{H}\}</math> NMR)</b> | 0.1848               | 0.1110               | 0.0012                      | 0.0951               | 0.2773               | 0.3306               | 0.0140             | 0.0269             | 0.3306              |
| <b>Relative intensities (normalized)</b>                                                                                                                                                                                                                    | 0.17753867           | 0.10663849           | 0.00115285                  | 0.09136324           | 0.26640407           | 0.31760976           | 0.0134499          | 0.02584302         |                     |
| $P_m$                                                                                                                                                                                                                                                       |                      |                      |                             |                      | 0.3970               | 0.3388               |                    |                    |                     |

<sup>a</sup> from  $^1\text{H}$  NMR. <sup>b</sup> from  $^{13}\text{C}\{^1\text{H}\}$  NMR.

Average:  $P_m = 0.3679$

### 2.4.3. Polymerisation of *rac*-lactide with compound 2 at 0 °C

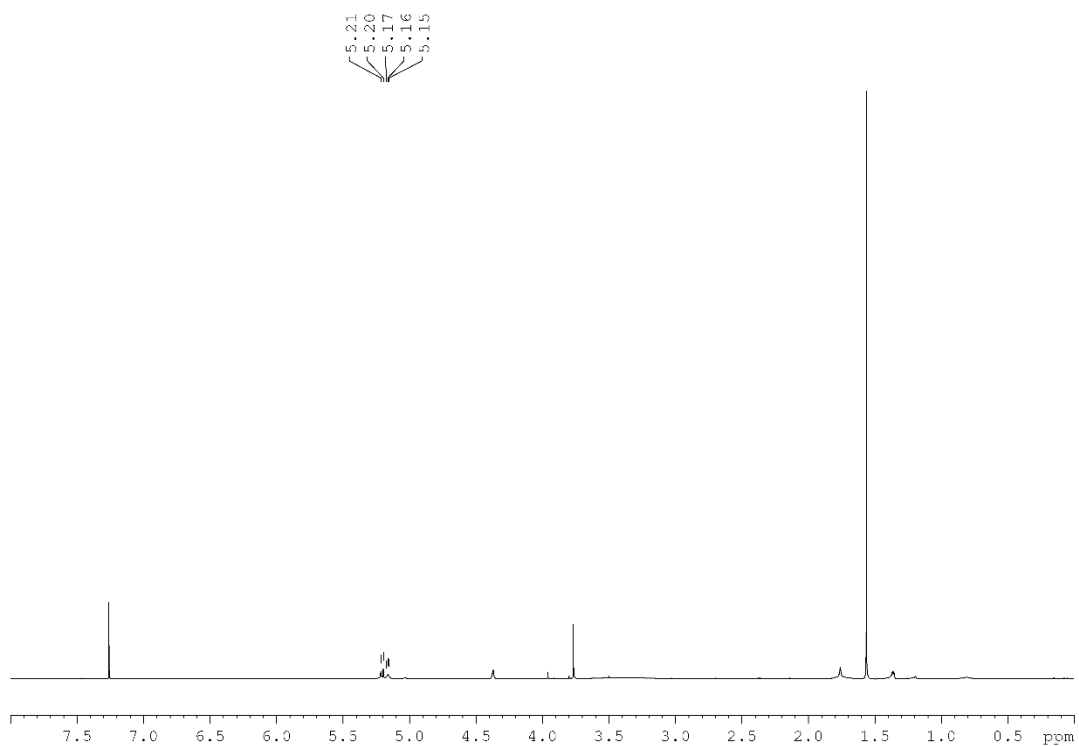

**Figure S30.** Homodecoupled  $^1\text{H}\{^1\text{H}\}$  NMR spectrum (500 MHz,  $\text{CDCl}_3$ ) of poly(lactide) obtained from the polymerisation of *rac*-lactide with **2** at 0 °C.

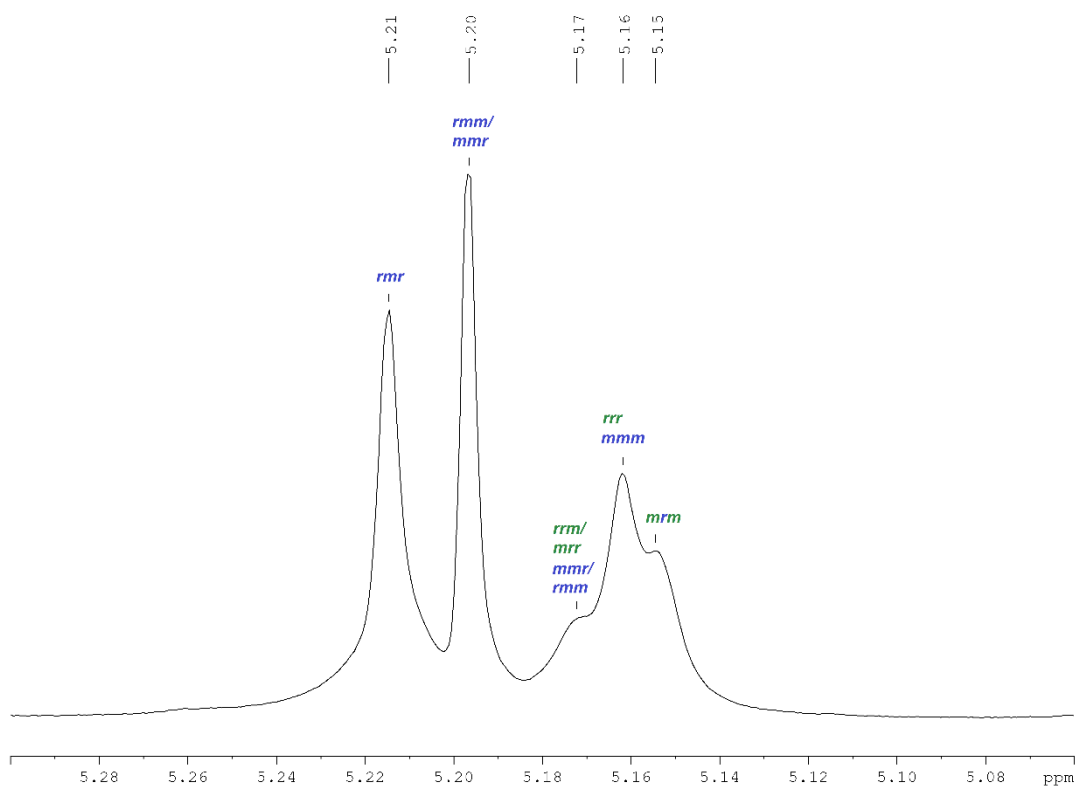

**Figure S31.** Methine region of the homodecoupled  $^1\text{H}\{^1\text{H}\}$  NMR spectrum (500 MHz,  $\text{CDCl}_3$ ) of poly(lactide) obtained from the polymerisation of *rac*-lactide with **2** at 0 °C.

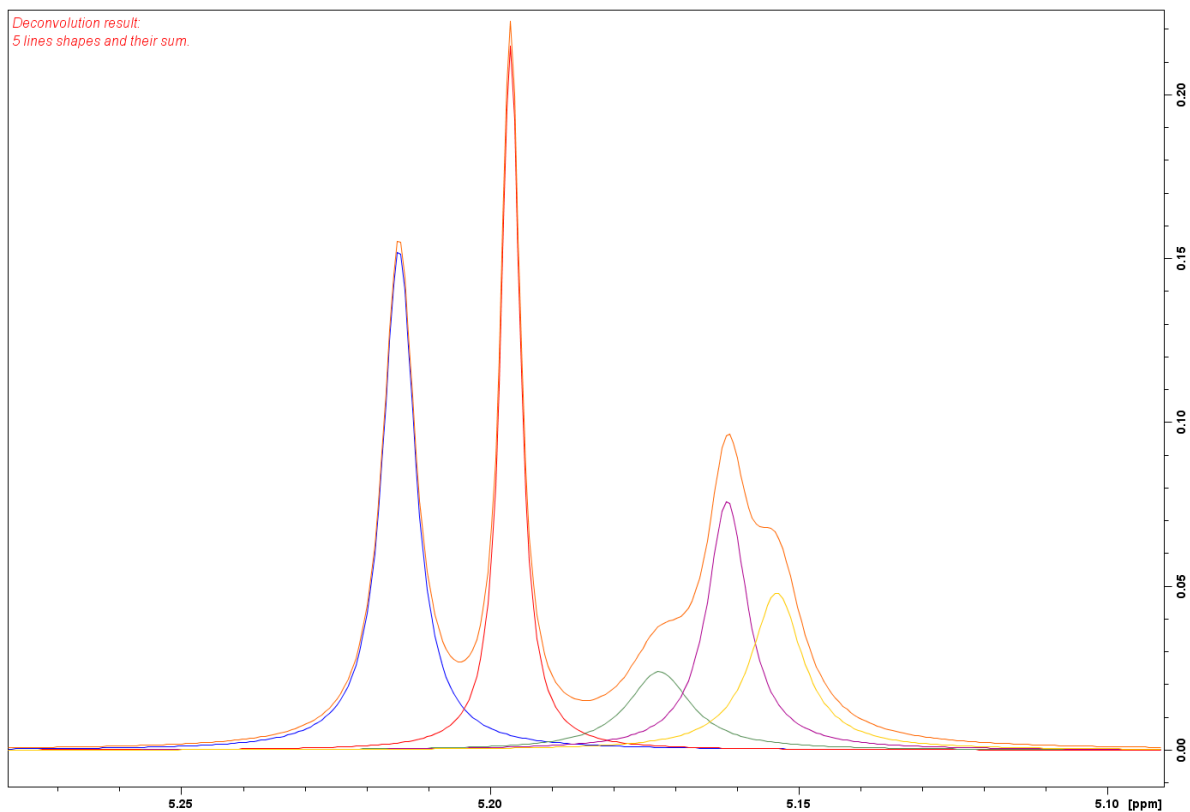

**Figure S32.** Deconvolution of the homodecoupled  $^1\text{H}\{^1\text{H}\}$  NMR spectrum (500 MHz,  $\text{CDCl}_3$ ) of poly(lactide) obtained from the polymerisation of *rac*-lactide with **2** at 0 °C.

| Fit         | Frequency    |                | Width          |              | Intensity    | Area         | %Lor.<br>chisq |
|-------------|--------------|----------------|----------------|--------------|--------------|--------------|----------------|
|             | ppm          | Hz             | ppm            | Hz           | Hz           |              |                |
| <b>1</b>    |              |                |                |              |              |              | <b>2.2e+12</b> |
|             | <b>5.215</b> | <b>2609.15</b> | <b>0.00631</b> | <b>3.157</b> | <b>0.153</b> | <b>2.480</b> | <b>100.00</b>  |
| <b>STD:</b> | <b>0.000</b> | <b>0.02</b>    | <b>0.00013</b> | <b>0.065</b> | <b>0.002</b> |              |                |
|             | <b>5.197</b> | <b>2600.15</b> | <b>0.00373</b> | <b>1.865</b> | <b>0.215</b> | <b>2.068</b> | <b>100.00</b>  |
| <b>STD:</b> | <b>0.000</b> | <b>0.01</b>    | <b>0.00007</b> | <b>0.036</b> | <b>0.003</b> |              |                |
|             | <b>5.173</b> | <b>2588.32</b> | <b>0.01236</b> | <b>6.185</b> | <b>0.024</b> | <b>0.762</b> | <b>100.00</b>  |
| <b>STD:</b> | <b>0.001</b> | <b>0.32</b>    | <b>0.00184</b> | <b>0.923</b> | <b>0.002</b> |              |                |
|             | <b>5.162</b> | <b>2582.80</b> | <b>0.00786</b> | <b>3.933</b> | <b>0.076</b> | <b>1.530</b> | <b>100.00</b>  |
| <b>STD:</b> | <b>0.000</b> | <b>0.08</b>    | <b>0.00073</b> | <b>0.366</b> | <b>0.003</b> |              |                |
|             | <b>5.154</b> | <b>2578.47</b> | <b>0.01006</b> | <b>5.035</b> | <b>0.048</b> | <b>1.245</b> | <b>100.00</b>  |
| <b>STD:</b> | <b>0.000</b> | <b>0.16</b>    | <b>0.00088</b> | <b>0.441</b> | <b>0.003</b> |              |                |

**Figure S33.**  $^1\text{H}\{^1\text{H}\}$  NMR deconvolution results. Fit type: Mixed Lorentzian and Gaussian.



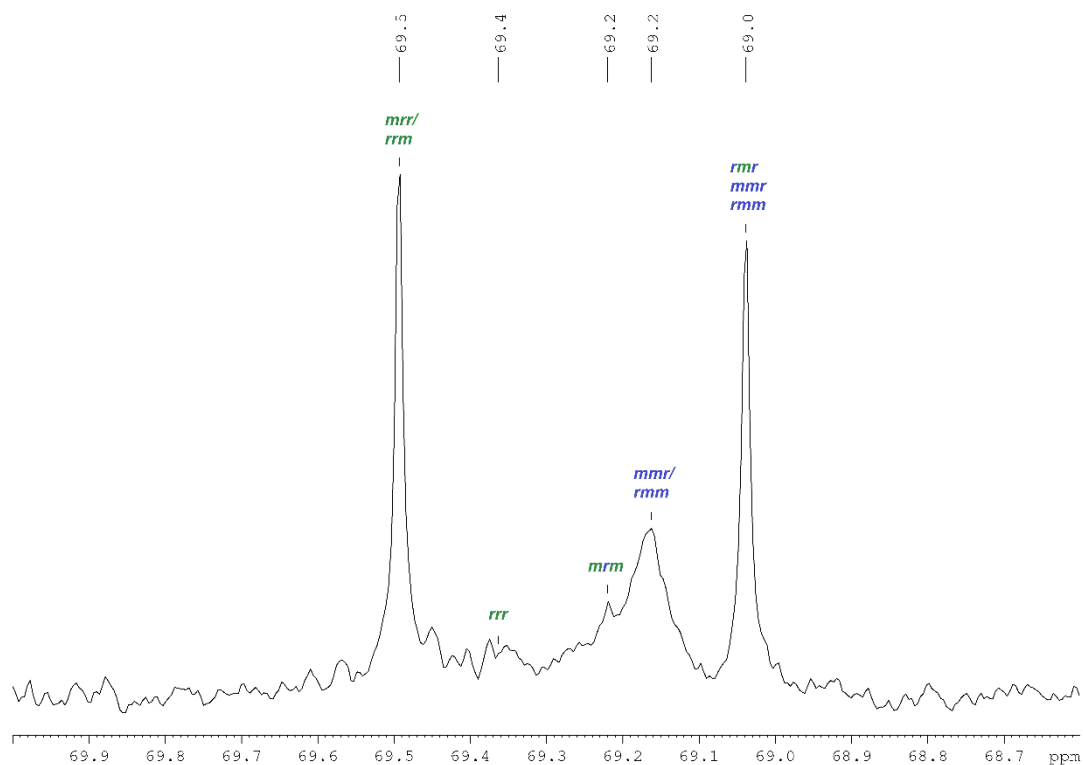

**Figure S34.** Methine region of the  $^{13}\text{C}\{^1\text{H}\}$  NMR (126 MHz,  $\text{CDCl}_3$ ) of poly(lactide) obtained from the polymerisation of *rac*-lactide with **2** at 0 °C.

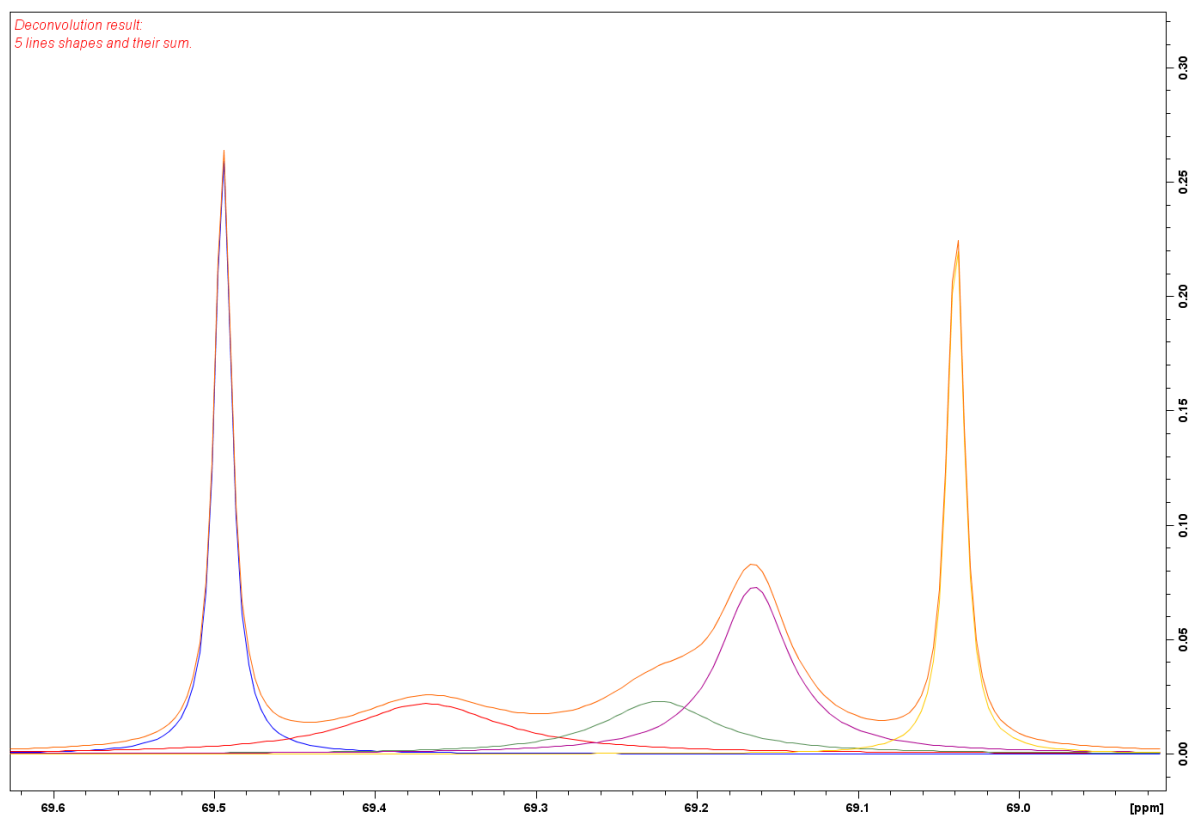

**Figure S35.** Deconvolution of the methine region of the  $^{13}\text{C}\{^1\text{H}\}$  NMR (126 MHz,  $\text{CDCl}_3$ ) of poly(lactide) obtained from the polymerisation of *rac*-lactide with **2** at 0 °C.

| Fit  | Frequency |         | Width   |        | Intensity | Area  | %Lor.<br>chisq |
|------|-----------|---------|---------|--------|-----------|-------|----------------|
|      | ppm       | Hz      | ppm     | Hz     |           |       |                |
| 1    |           |         |         |        |           |       | 5.5e+12        |
|      | 69.495    | 8742.91 | 0.01321 | 1.661  | 0.261     | 1.430 | 100.00         |
| STD: | 0.000     | 0.02    | 0.00041 | 0.051  | 0.005     |       |                |
|      | 69.369    | 8726.97 | 0.11364 | 14.297 | 0.022     | 1.015 | 100.00         |
| STD: | 0.006     | 0.74    | 0.02145 | 2.699  | 0.002     |       |                |
|      | 69.225    | 8708.88 | 0.08426 | 10.600 | 0.023     | 0.795 | 100.00         |
| STD: | 0.009     | 1.14    | 0.02975 | 3.743  | 0.004     |       |                |
|      | 69.166    | 8701.52 | 0.05311 | 6.682  | 0.073     | 1.599 | 100.00         |
| STD: | 0.002     | 0.20    | 0.00553 | 0.696  | 0.006     |       |                |
|      | 69.041    | 8685.69 | 0.01271 | 1.599  | 0.230     | 1.210 | 100.00         |
| STD: | 0.000     | 0.02    | 0.00043 | 0.054  | 0.005     |       |                |

Figure S36. <sup>13</sup>C{<sup>1</sup>H} NMR deconvolution results. Fit type: Mixed Lorentzian and Gaussian.

**Table S4.** Tetrad intensities derived from the  $^1\text{H}\{^1\text{H}\}$  and  $^{13}\text{C}\{^1\text{H}\}$  NMR spectra.

|                                                                                                                                                                                                                                                             | $P_{rmr}$          | $P_{rmm/mmr}$      | $\delta = 5.19$ ppm | $P_{mmr/rmm}$      | $P_{mmm}$          | $P_{mrm}$          | $P_{rrr}$          | $P_{rrm}$          | $P_{mrm}$          |
|-------------------------------------------------------------------------------------------------------------------------------------------------------------------------------------------------------------------------------------------------------------|--------------------|--------------------|---------------------|--------------------|--------------------|--------------------|--------------------|--------------------|--------------------|
| <b>Area from deconvolution (<math>^1\text{H}</math> or <math>^{13}\text{C}\{^1\text{H}\}</math> NMR)</b>                                                                                                                                                    | 2.480 <sup>a</sup> | 2.068 <sup>a</sup> | 0.000 <sup>a</sup>  | 0.762 <sup>a</sup> | 1.530 <sup>a</sup> | 1.245 <sup>a</sup> | 1.015 <sup>b</sup> | 1.430 <sup>b</sup> | 0.795 <sup>b</sup> |
| <b>Intensity in <math>^1\text{H}</math> NMR (normalized) and relative intensity in <math>^{13}\text{C}\{^1\text{H}\}</math> NMR (by equating <math>P_{mrm}</math> values from <math>^1\text{H}</math> and <math>^{13}\text{C}\{^1\text{H}\}</math> NMR)</b> | 0.3067             | 0.2558             | 0.000               | 0.0942             | 0.1892             | 0.1540             | 0.1966             | 0.2770             | 0.1540             |
| <b>Relative intensities (normalized)</b>                                                                                                                                                                                                                    | 0.20814388         | 0.17360027         | 0                   | 0.06392942         | 0.12840176         | 0.10451306         | 0.13342382         | 0.18798778         | 0.20814388         |
| $P_m$                                                                                                                                                                                                                                                       |                    |                    |                     |                    | 0.2928             | 0.6920             |                    |                    |                    |

<sup>a</sup> from  $^1\text{H}$  NMR. <sup>b</sup> from  $^{13}\text{C}\{^1\text{H}\}$  NMR.

Average:  $P_m = 0.4924$

Due to insufficient resolution and strong line broadening, the value obtained from  $P_{mrm}$  is not reliable. Therefore,  $P_m$  obtained from  $P_{mmm}$  was selected, which is in good agreement with the values calculated for the previous samples.

#### 2.4.4. Polymerisation of *rac*-lactide with compound **3**

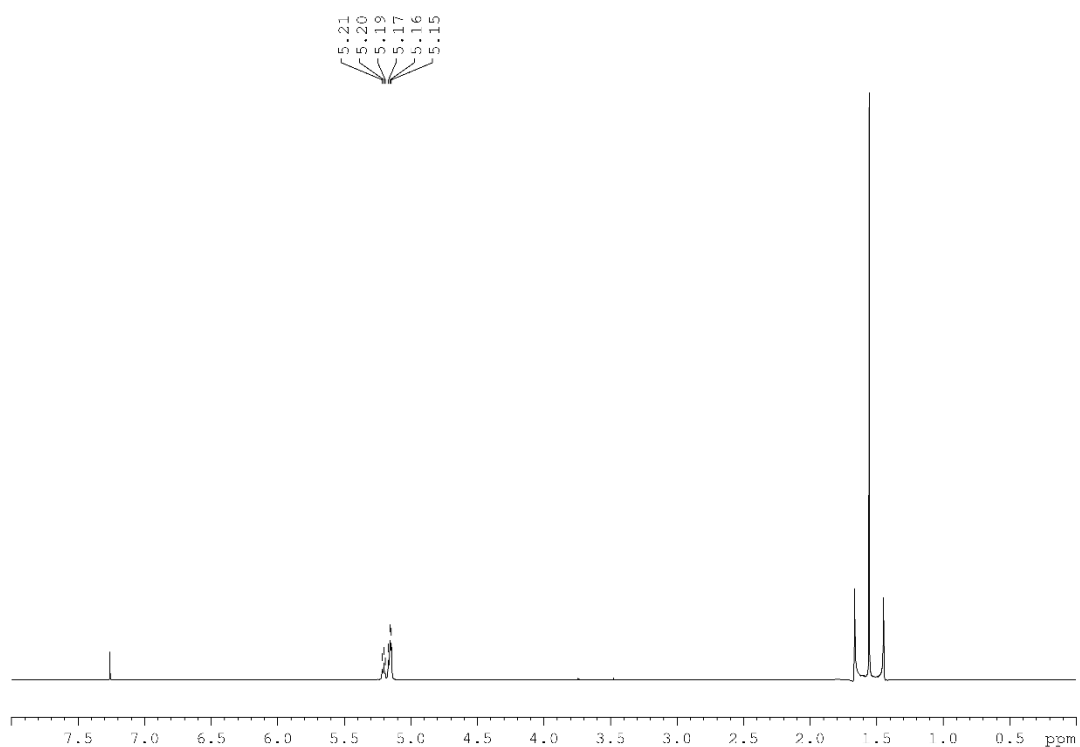

**Figure S37.** Homodecoupled  $^1\text{H}\{^1\text{H}\}$  NMR spectrum (500 MHz,  $\text{CDCl}_3$ ) of poly(lactide) obtained from the polymerisation of *rac*-lactide with **3**.

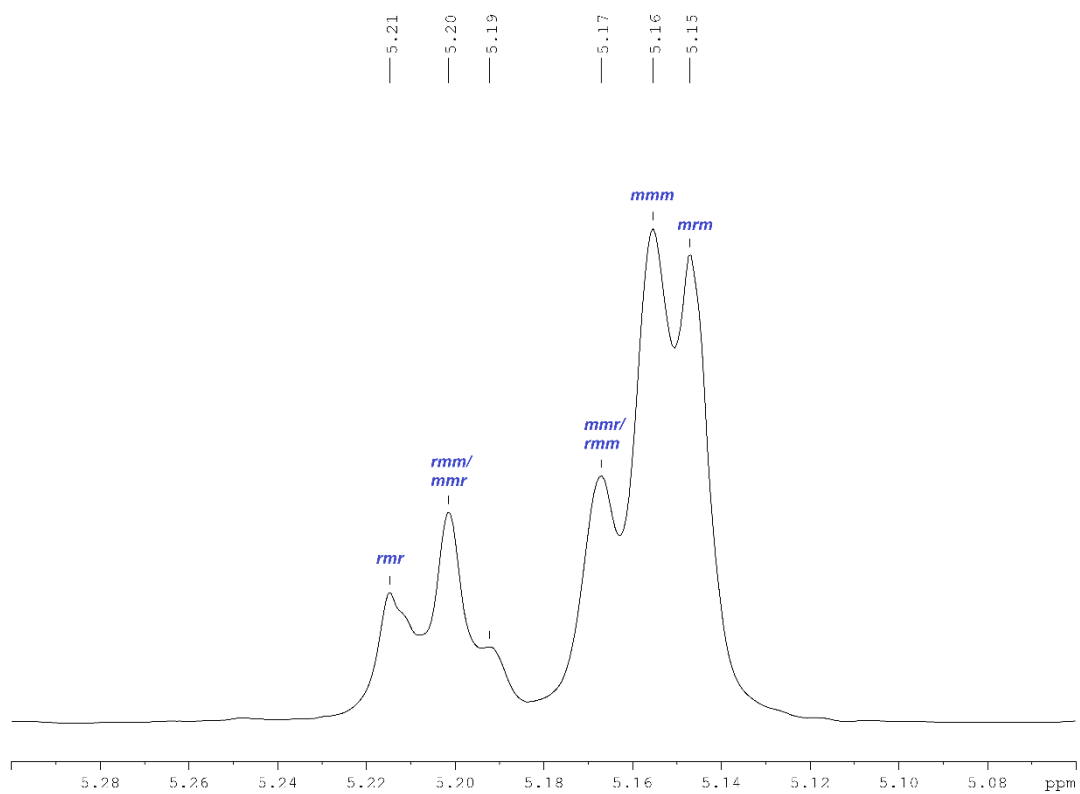

**Figure S38.** Methine region of the homodecoupled  $^1\text{H}\{^1\text{H}\}$  NMR spectrum (500 MHz,  $\text{CDCl}_3$ ) of poly(lactide) obtained from the polymerisation of *rac*-lactide with **3**.

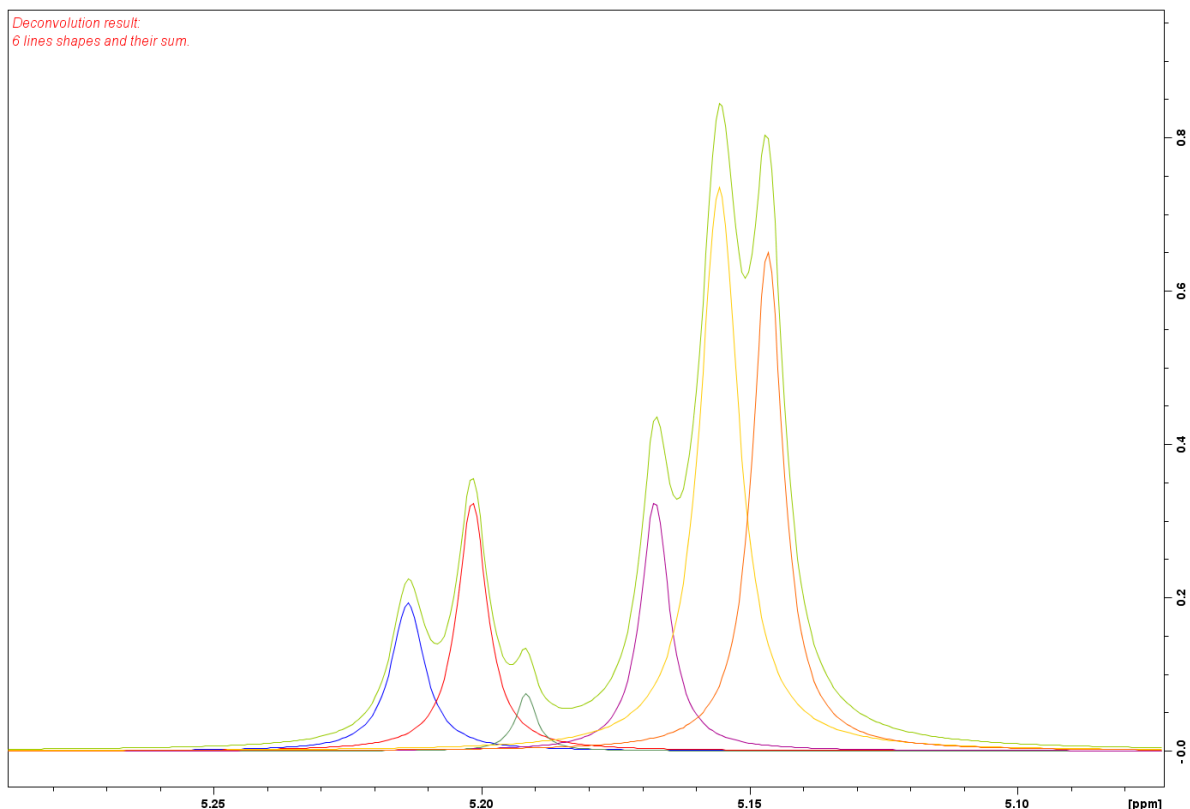

**Figure S39.** Deconvolution of the homodecoupled  $^1\text{H}\{^1\text{H}\}$  NMR spectrum (500 MHz,  $\text{CDCl}_3$ ) of poly(lactide) obtained from the polymerisation of *rac*-lactide with **3**.

| Fit  | Frequency |         | Width   |       | Intensity | Area   | %Lor.<br>chisq |
|------|-----------|---------|---------|-------|-----------|--------|----------------|
|      | ppm       | Hz      | ppm     | Hz    |           |        |                |
| 1    |           |         |         |       |           |        | 6e+13          |
|      | 5.214     | 2608.77 | 0.00744 | 3.722 | 0.193     | 3.693  | 100.00         |
| STD: | 0.000     | 0.09    | 0.00057 | 0.284 | 0.009     |        |                |
|      | 5.202     | 2602.53 | 0.00673 | 3.367 | 0.324     | 5.619  | 100.00         |
| STD: | 0.000     | 0.05    | 0.00039 | 0.196 | 0.009     |        |                |
|      | 5.192     | 2597.73 | 0.00456 | 2.281 | 0.075     | 0.886  | 100.00         |
| STD: | 0.000     | 0.17    | 0.00114 | 0.571 | 0.011     |        |                |
|      | 5.168     | 2585.71 | 0.00640 | 3.200 | 0.325     | 5.353  | 100.00         |
| STD: | 0.000     | 0.05    | 0.00033 | 0.167 | 0.010     |        |                |
|      | 5.156     | 2579.57 | 0.00880 | 4.403 | 0.735     | 16.649 | 100.00         |
| STD: | 0.000     | 0.03    | 0.00027 | 0.138 | 0.009     |        |                |
|      | 5.147     | 2575.03 | 0.00701 | 3.505 | 0.651     | 11.750 | 100.00         |
| STD: | 0.000     | 0.03    | 0.00021 | 0.104 | 0.011     |        |                |

**Figure S40.**  $^1\text{H}\{^1\text{H}\}$  NMR deconvolution results. Fit type: Mixed Lorentzian and Gaussian.

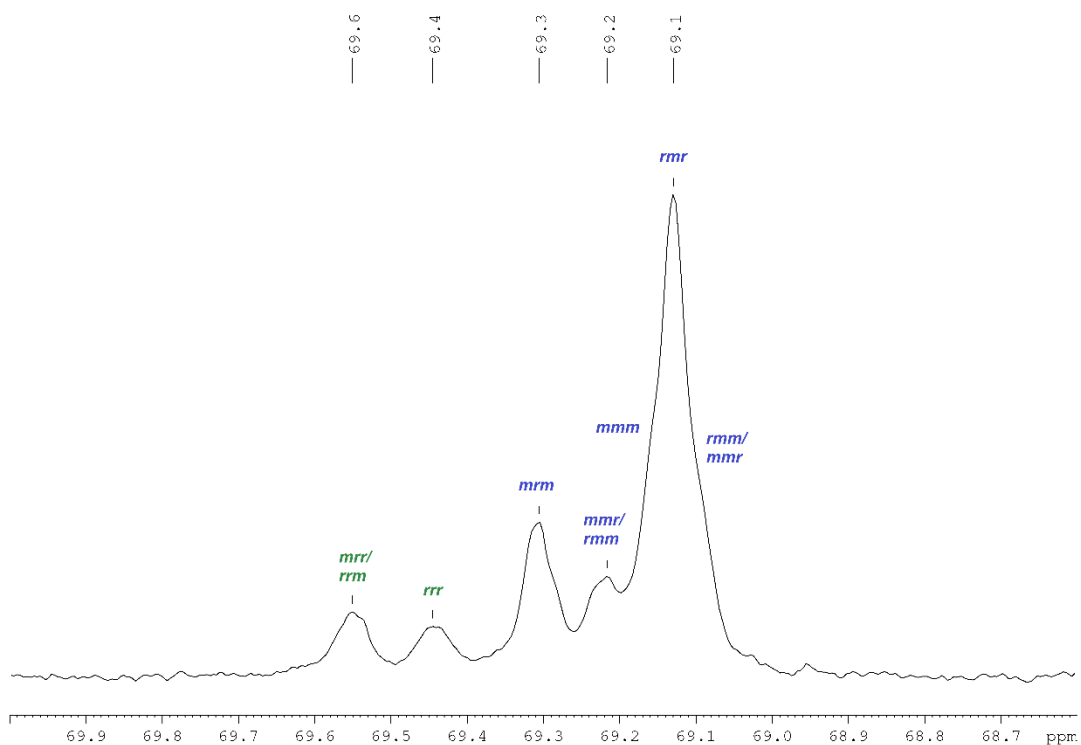

**Figure S41.** Methine region of the  $^{13}\text{C}\{^1\text{H}\}$  NMR (126 MHz,  $\text{CDCl}_3$ ) of poly(lactide) obtained from the polymerisation of *rac*-lactide with **3**.

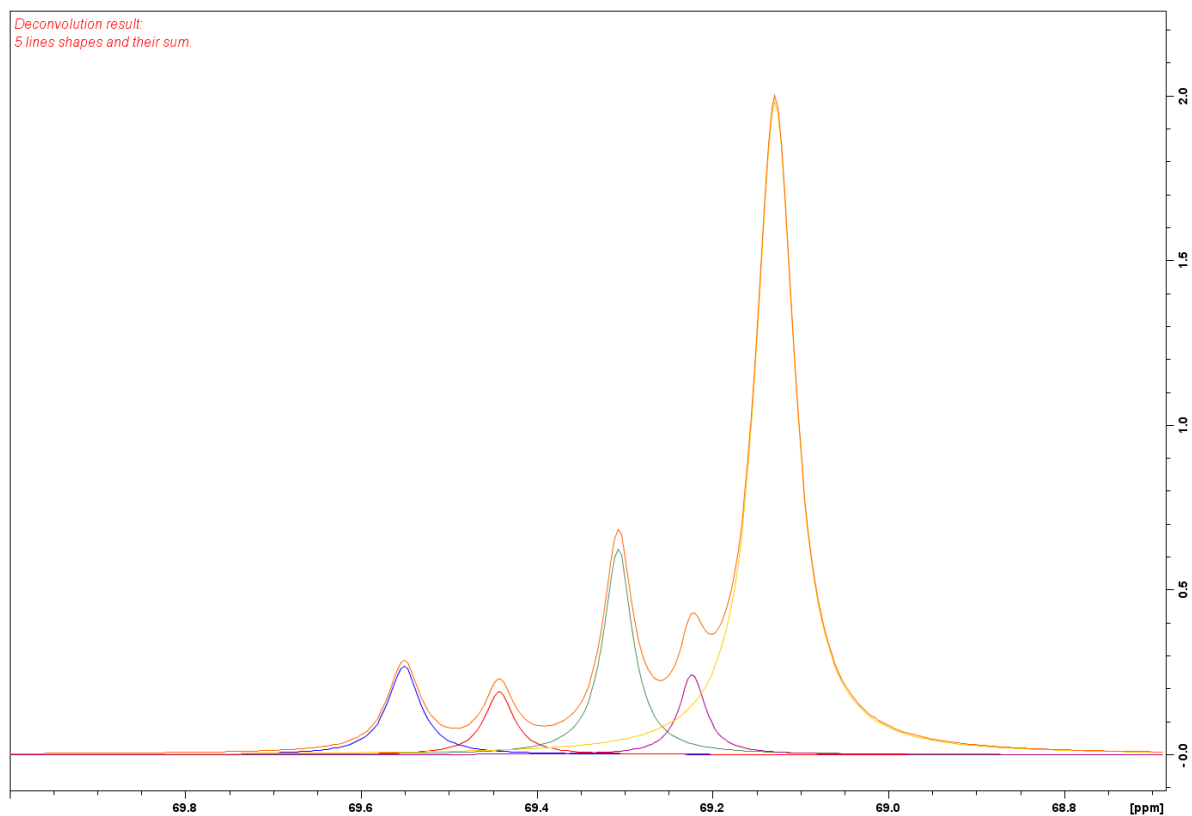

**Figure S42.** Deconvolution of the methine region of the  $^{13}\text{C}\{^1\text{H}\}$  NMR (126 MHz,  $\text{CDCl}_3$ ) of poly(lactide) obtained from the polymerisation of *rac*-lactide with **3**.

| Fit  | Frequency |         | Width   |       | Intensity | Area   | %Lor.<br>chisq |
|------|-----------|---------|---------|-------|-----------|--------|----------------|
|      | ppm       | Hz      | ppm     | Hz    |           |        |                |
| 1    |           |         |         |       |           |        | 1.3e+14        |
|      | 69.553    | 8750.13 | 0.04471 | 5.625 | 0.268     | 4.973  | 100.00         |
| STD: | 0.001     | 0.19    | 0.00451 | 0.567 | 0.018     |        |                |
|      | 69.445    | 8736.60 | 0.03981 | 5.008 | 0.192     | 3.160  | 100.00         |
| STD: | 0.002     | 0.25    | 0.00606 | 0.762 | 0.019     |        |                |
|      | 69.310    | 8719.54 | 0.03978 | 5.004 | 0.624     | 10.294 | 100.00         |
| STD: | 0.001     | 0.08    | 0.00192 | 0.242 | 0.019     |        |                |
|      | 69.226    | 8708.99 | 0.03581 | 4.506 | 0.244     | 3.624  | 100.00         |
| STD: | 0.001     | 0.19    | 0.00500 | 0.630 | 0.020     |        |                |
|      | 69.132    | 8697.21 | 0.05385 | 6.774 | 1.984     | 44.266 | 100.00         |
| STD: | 0.000     | 0.03    | 0.00071 | 0.089 | 0.016     |        |                |

Figure S43. <sup>13</sup>C{<sup>1</sup>H} NMR deconvolution results. Fit type: Mixed Lorentzian and Gaussian.

**Table S5.** Tetrad intensities derived from the  $^1\text{H}\{^1\text{H}\}$  and  $^{13}\text{C}\{^1\text{H}\}$  NMR spectra.

|                                                                                                                                                                                                                                                             | $P_{rmr}$          | $P_{rmm/mmr}$      | $\delta = 5.19$ ppm | $P_{mmr/rmm}$      | $P_{mmm}$           | $P_{mrm}$           | $P_{rrr}$          | $P_{rrm}$          | $P_{mrm}$           |
|-------------------------------------------------------------------------------------------------------------------------------------------------------------------------------------------------------------------------------------------------------------|--------------------|--------------------|---------------------|--------------------|---------------------|---------------------|--------------------|--------------------|---------------------|
| <b>Area from deconvolution (<math>^1\text{H}</math> or <math>^{13}\text{C}\{^1\text{H}\}</math> NMR)</b>                                                                                                                                                    | 3.693 <sup>a</sup> | 5.619 <sup>a</sup> | 0.886 <sup>a</sup>  | 5.353 <sup>a</sup> | 16.649 <sup>a</sup> | 11.750 <sup>a</sup> | 3.160 <sup>b</sup> | 4.973 <sup>b</sup> | 10.294 <sup>b</sup> |
| <b>Intensity in <math>^1\text{H}</math> NMR (normalized) and relative intensity in <math>^{13}\text{C}\{^1\text{H}\}</math> NMR (by equating <math>P_{mrm}</math> values from <math>^1\text{H}</math> and <math>^{13}\text{C}\{^1\text{H}\}</math> NMR)</b> | 0.0840             | 0.1278             | 0.0202              | 0.1218             | 0.3788              | 0.2673              | 0.0821             | 0.1291             | 0.2673              |
| <b>Relative intensities (normalized)</b>                                                                                                                                                                                                                    | 0.06935843         | 0.1055239          | 0.01667905          | 0.10056973         | 0.31277351          | 0.22070845          | 0.06778961         | 0.10659731         | 0.06935843          |
| $P_m$                                                                                                                                                                                                                                                       |                    |                    |                     |                    | 0.5038              | 0.4653              |                    |                    |                     |

<sup>a</sup> from  $^1\text{H}$  NMR. <sup>b</sup> from  $^{13}\text{C}\{^1\text{H}\}$  NMR.

Average:  $P_m = 0.4846$



## 2.4.5. Polymerisation of *rac*-lactide with compound 4

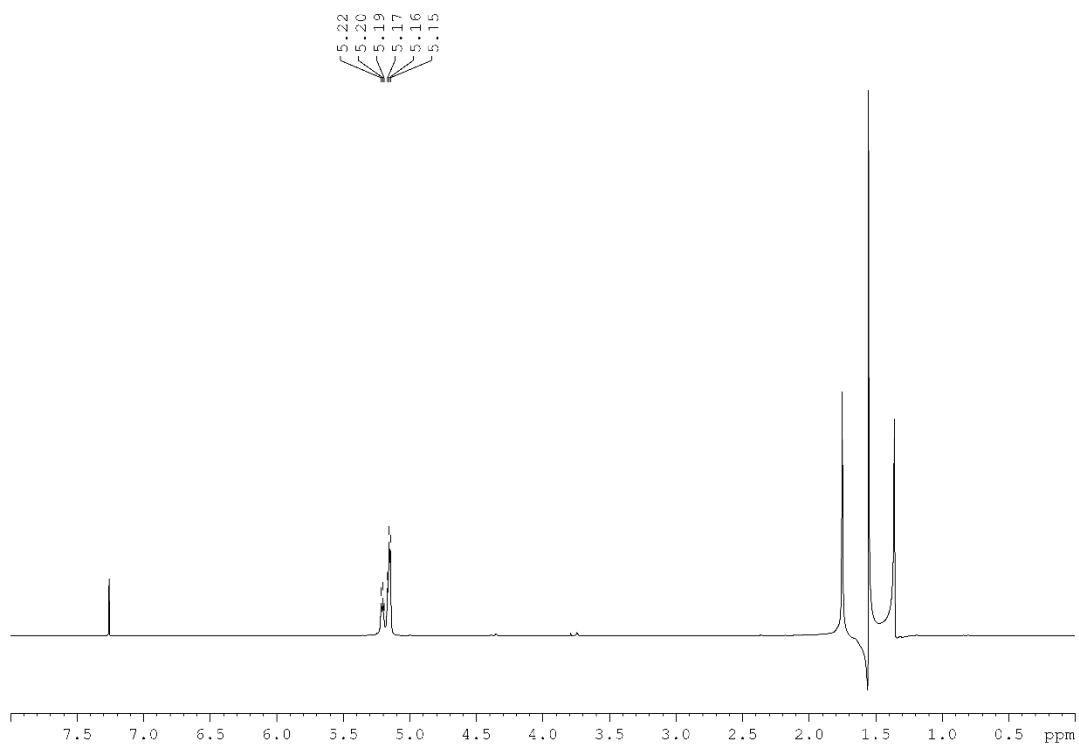

**Figure S44.** Homodecoupled  $^1\text{H}\{^1\text{H}\}$  NMR spectrum (500 MHz,  $\text{CDCl}_3$ ) of poly(lactide) obtained from the polymerisation of *rac*-lactide with 4.

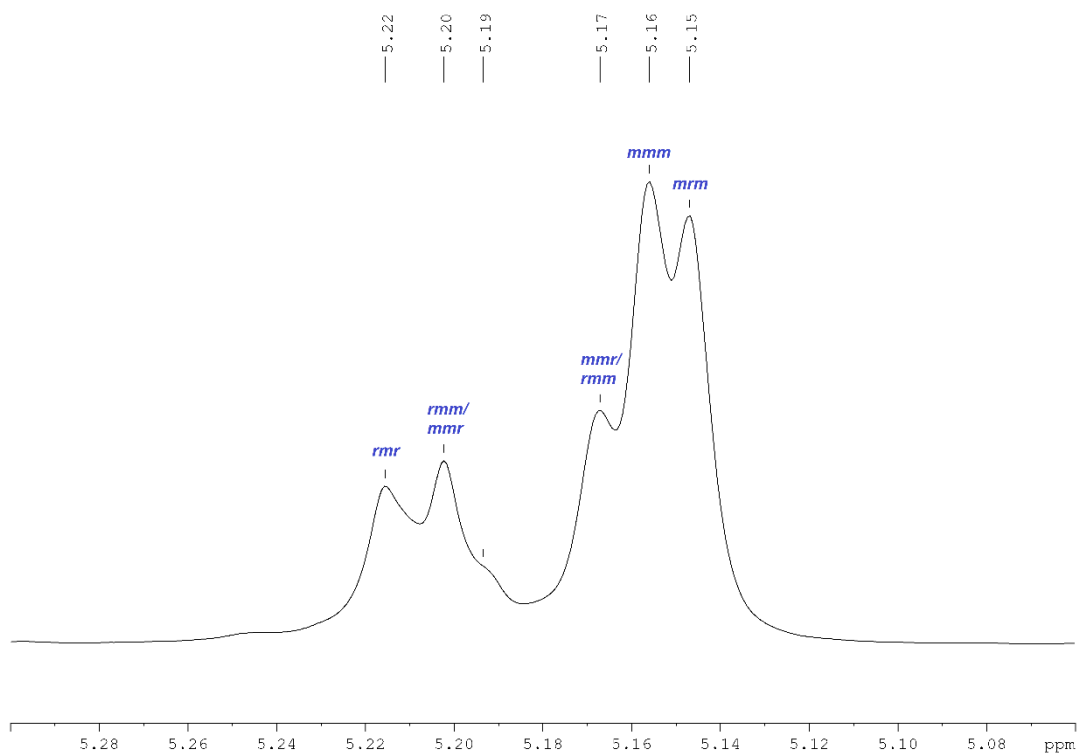

**Figure S45.** Methine region of the homodecoupled  $^1\text{H}\{^1\text{H}\}$  NMR spectrum (500 MHz,  $\text{CDCl}_3$ ) of poly(lactide) obtained from the polymerisation of *rac*-lactide with 4.

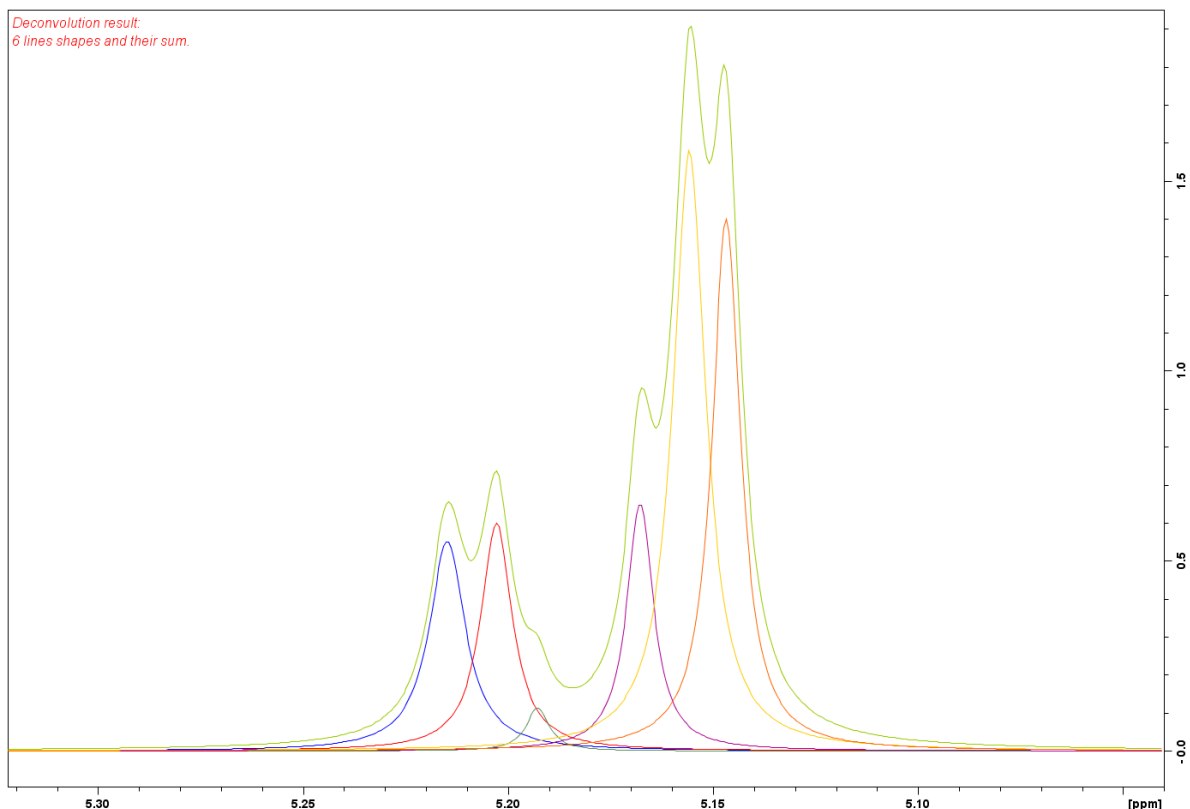

**Figure S46.** Deconvolution of the homodecoupled  $^1\text{H}\{^1\text{H}\}$  NMR spectrum (500 MHz,  $\text{CDCl}_3$ ) of poly(lactide) obtained from the polymerisation of *rac*-lactide with **4**.

| Fit         | Frequency |         | Width   |       | Intensity | Area   | %Lor.<br>chisq |
|-------------|-----------|---------|---------|-------|-----------|--------|----------------|
|             | ppm       | Hz      | ppm     | Hz    |           |        |                |
| <b>1</b>    |           |         |         |       |           |        | <b>1e+14</b>   |
|             | 5.215     | 2609.34 | 0.01070 | 5.355 | 0.552     | 15.209 | 100.00         |
| <b>STD:</b> | 0.000     | 0.07    | 0.00042 | 0.212 | 0.012     |        |                |
|             | 5.203     | 2602.93 | 0.00932 | 4.662 | 0.600     | 14.387 | 100.00         |
| <b>STD:</b> | 0.000     | 0.06    | 0.00056 | 0.280 | 0.013     |        |                |
|             | 5.193     | 2598.06 | 0.00672 | 3.364 | 0.114     | 1.975  | 100.00         |
| <b>STD:</b> | 0.000     | 0.25    | 0.00171 | 0.853 | 0.016     |        |                |
|             | 5.168     | 2585.85 | 0.00795 | 3.978 | 0.651     | 13.335 | 100.00         |
| <b>STD:</b> | 0.000     | 0.05    | 0.00032 | 0.158 | 0.014     |        |                |
|             | 5.156     | 2579.89 | 0.00978 | 4.892 | 1.580     | 39.774 | 100.00         |
| <b>STD:</b> | 0.000     | 0.03    | 0.00024 | 0.122 | 0.014     |        |                |
|             | 5.147     | 2575.05 | 0.00838 | 4.192 | 1.401     | 30.222 | 100.00         |
| <b>STD:</b> | 0.000     | 0.03    | 0.00017 | 0.084 | 0.017     |        |                |

**Figure S47.**  $^1\text{H}\{^1\text{H}\}$  NMR deconvolution results. Fit type: Mixed Lorentzian and Gaussian.

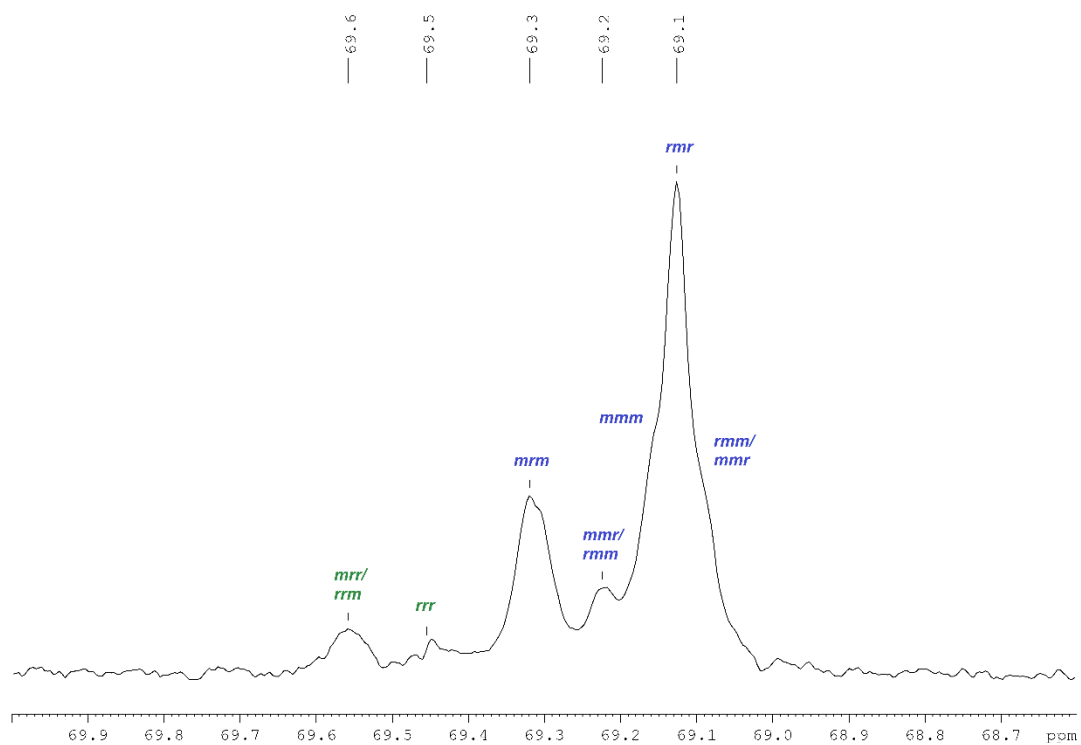

**Figure S48.** Methine region of the  $^{13}\text{C}\{^1\text{H}\}$  NMR (126 MHz,  $\text{CDCl}_3$ ) of poly(lactide) obtained from the polymerisation of *rac*-lactide with **4**.

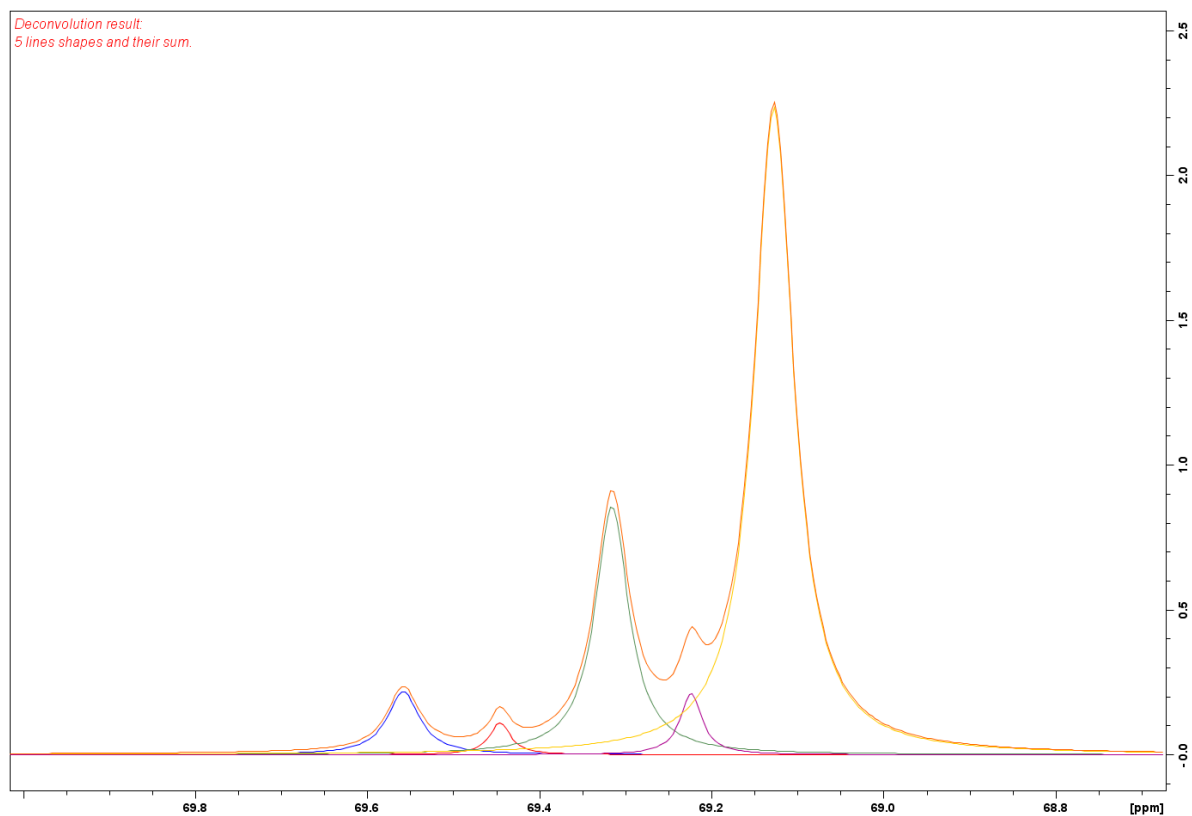

**Figure S49.** Deconvolution of the methine region of the  $^{13}\text{C}\{^1\text{H}\}$  NMR (126 MHz,  $\text{CDCl}_3$ ) of poly(lactide) obtained from the polymerisation of *rac*-lactide with **4**.

| Fit  | Frequency |         | Width   |       | Intensity | Area   | %Lor.<br>chisq |
|------|-----------|---------|---------|-------|-----------|--------|----------------|
|      | ppm       | Hz      | ppm     | Hz    |           |        |                |
| 1    |           |         |         |       |           |        | 2.5e+14        |
|      | 69.559    | 8750.97 | 0.04567 | 5.746 | 0.217     | 4.116  | 100.00         |
| STD: | 0.003     | 0.34    | 0.00796 | 1.001 | 0.026     |        |                |
|      | 69.447    | 8736.81 | 0.02952 | 3.713 | 0.111     | 1.361  | 100.00         |
| STD: | 0.004     | 0.53    | 0.01263 | 1.588 | 0.032     |        |                |
|      | 69.317    | 8720.49 | 0.04748 | 5.973 | 0.859     | 16.901 | 100.00         |
| STD: | 0.001     | 0.09    | 0.00220 | 0.277 | 0.025     |        |                |
|      | 69.225    | 8708.95 | 0.03020 | 3.799 | 0.213     | 2.667  | 100.00         |
| STD: | 0.002     | 0.28    | 0.00729 | 0.917 | 0.031     |        |                |
|      | 69.129    | 8696.85 | 0.05562 | 6.998 | 2.235     | 51.511 | 100.00         |
| STD: | 0.000     | 0.04    | 0.00092 | 0.115 | 0.023     |        |                |

Figure S50.  $^{13}\text{C}\{^1\text{H}\}$  NMR deconvolution results. Fit type: Mixed Lorentzian and Gaussian.

**Table S6.** Tetrad intensities derived from the  $^1\text{H}\{^1\text{H}\}$  and  $^{13}\text{C}\{^1\text{H}\}$  NMR spectra.

|                                                                                                                                                                                                                                                             | $P_{rmr}$           | $P_{rmm/mmr}$       | $\delta = 5.19 \text{ ppm}$ | $P_{mmr/rmm}$       | $P_{mmm}$           | $P_{mrm}$           | $P_{rrr}$          | $P_{rrm}$          | $P_{mrm}$           |
|-------------------------------------------------------------------------------------------------------------------------------------------------------------------------------------------------------------------------------------------------------------|---------------------|---------------------|-----------------------------|---------------------|---------------------|---------------------|--------------------|--------------------|---------------------|
| <b>Area from deconvolution (<math>^1\text{H}</math> or <math>^{13}\text{C}\{^1\text{H}\}</math> NMR)</b>                                                                                                                                                    | 15.209 <sup>a</sup> | 14.387 <sup>a</sup> | 1.975 <sup>a</sup>          | 13.335 <sup>a</sup> | 39.774 <sup>a</sup> | 30.220 <sup>a</sup> | 1.361 <sup>b</sup> | 4.116 <sup>b</sup> | 16.901 <sup>b</sup> |
| <b>Intensity in <math>^1\text{H}</math> NMR (normalized) and relative intensity in <math>^{13}\text{C}\{^1\text{H}\}</math> NMR (by equating <math>P_{mrm}</math> values from <math>^1\text{H}</math> and <math>^{13}\text{C}\{^1\text{H}\}</math> NMR)</b> | 0.1324              | 0.1252              | 0.0172                      | 0.1161              | 0.3462              | 0.2630              | 0.0212             | 0.0640             | 0.2630              |
| <b>Relative intensities (normalized)</b>                                                                                                                                                                                                                    | 0.12199392          | 0.11535981          | 0.01584815                  | 0.10697503          | 0.31899014          | 0.24232931          | 0.01953377         | 0.05896987         |                     |
| $P_m$                                                                                                                                                                                                                                                       |                     |                     |                             |                     | 0.4707              | 0.4740              |                    |                    |                     |

<sup>a</sup> from  $^1\text{H}$  NMR. <sup>b</sup> from  $^{13}\text{C}\{^1\text{H}\}$  NMR.

Average:  $P_m = 0.4724$

## 2.4.6. Polymerisation of *rac*-lactide with compound 5

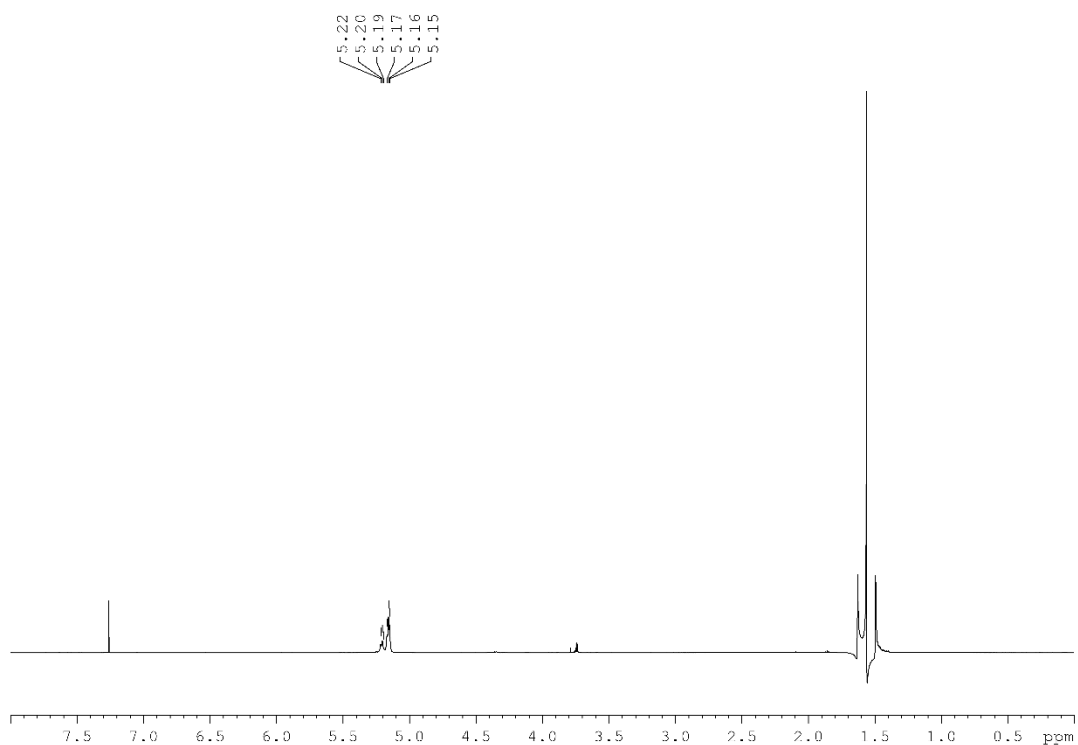

**Figure S51.** Homodecoupled  $^1\text{H}\{^1\text{H}\}$  NMR spectrum (500 MHz,  $\text{CDCl}_3$ ) of poly(lactide) obtained from the polymerisation of *rac*-lactide with **5**.

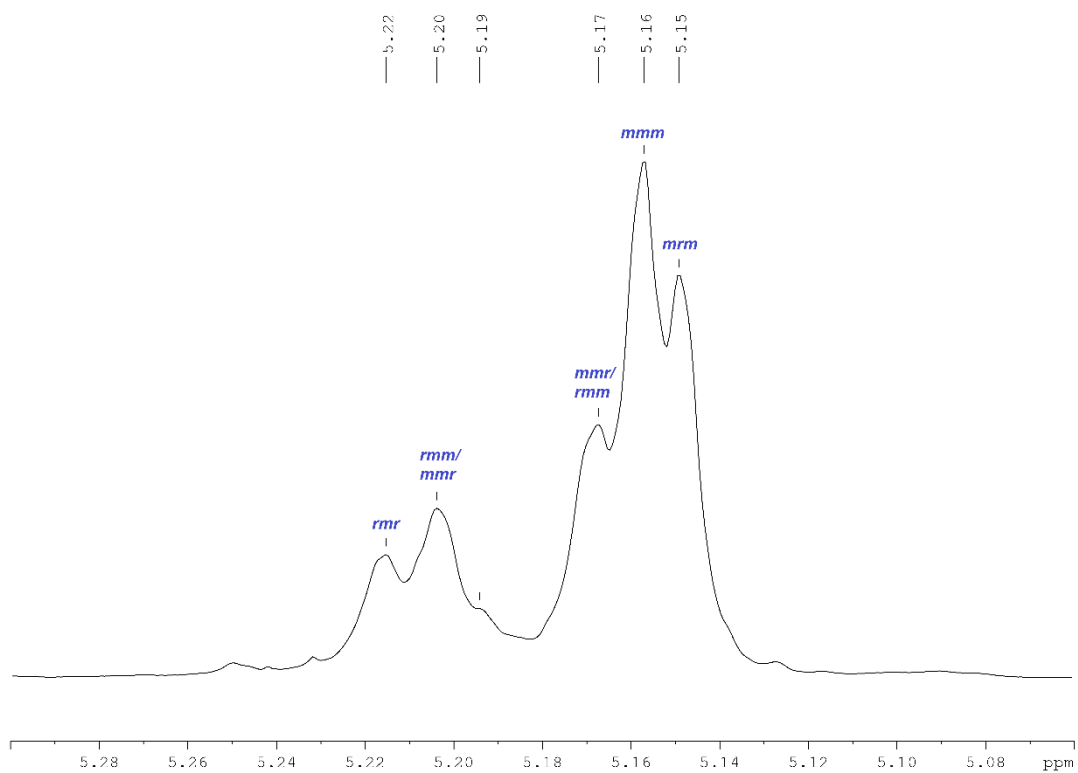

**Figure S52.** Methine region of the homodecoupled  $^1\text{H}\{^1\text{H}\}$  NMR spectrum (500 MHz,  $\text{CDCl}_3$ ) of poly(lactide) obtained from the polymerisation of *rac*-lactide with **5**.

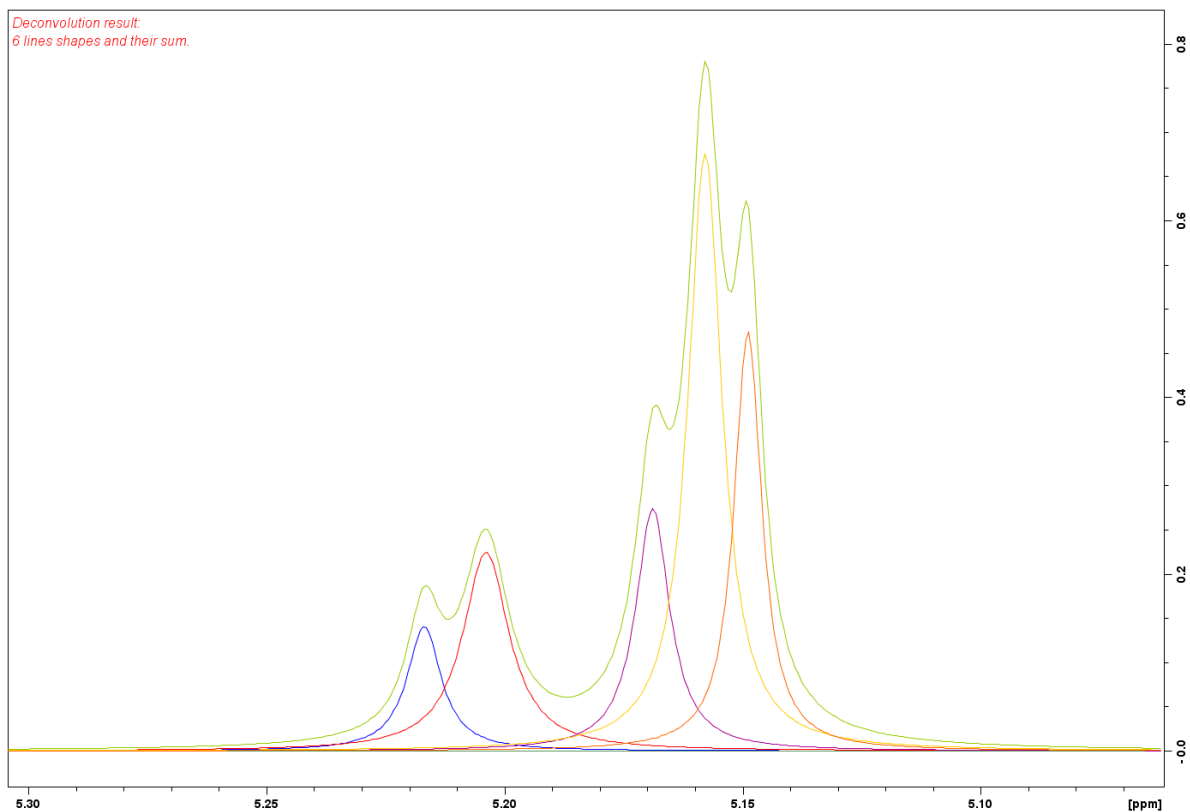

**Figure S53.** Deconvolution of the homodecoupled  $^1\text{H}\{^1\text{H}\}$  NMR spectrum (500 MHz,  $\text{CDCl}_3$ ) of poly(lactide) obtained from the polymerisation of *rac*-lactide with **5**.

| Fit         | Frequency |         | Width   |         | Intensity | Area   | %Lor. chisq  |
|-------------|-----------|---------|---------|---------|-----------|--------|--------------|
|             | ppm       | Hz      | ppm     | Hz      |           |        |              |
| <b>1</b>    |           |         |         |         |           |        | <b>1e+13</b> |
|             | 5.217     | 2610.07 | 0.00874 | 4.374   | 0.141     | 3.182  | 100.00       |
| <b>STD:</b> | 0.000     | 0.08    | 0.00056 | 0.283   | 0.005     |        |              |
|             | 5.204     | 2603.50 | 0.01179 | 5.899   | 0.225     | 6.840  | 100.00       |
| <b>STD:</b> | 0.000     | 0.09    | 0.00043 | 0.217   | 0.005     |        |              |
|             | 5.200     | 2601.63 | 0.00116 | 0.580   | 0.000     | 0.000  | 100.00       |
| <b>STD:</b> | 0.082     | 40.90   | 0.26454 | 132.355 | 0.013     |        |              |
|             | 5.169     | 2586.39 | 0.00870 | 4.351   | 0.274     | 6.147  | 100.00       |
| <b>STD:</b> | 0.000     | 0.05    | 0.00031 | 0.153   | 0.005     |        |              |
|             | 5.158     | 2580.60 | 0.00872 | 4.361   | 0.676     | 15.183 | 100.00       |
| <b>STD:</b> | 0.000     | 0.02    | 0.00019 | 0.095   | 0.005     |        |              |
|             | 5.149     | 2575.93 | 0.00700 | 3.503   | 0.475     | 8.574  | 100.00       |
| <b>STD:</b> | 0.000     | 0.02    | 0.00017 | 0.083   | 0.006     |        |              |

**Figure S54.**  $^1\text{H}\{^1\text{H}\}$  NMR deconvolution results. Fit type: Mixed Lorentzian and Gaussian.

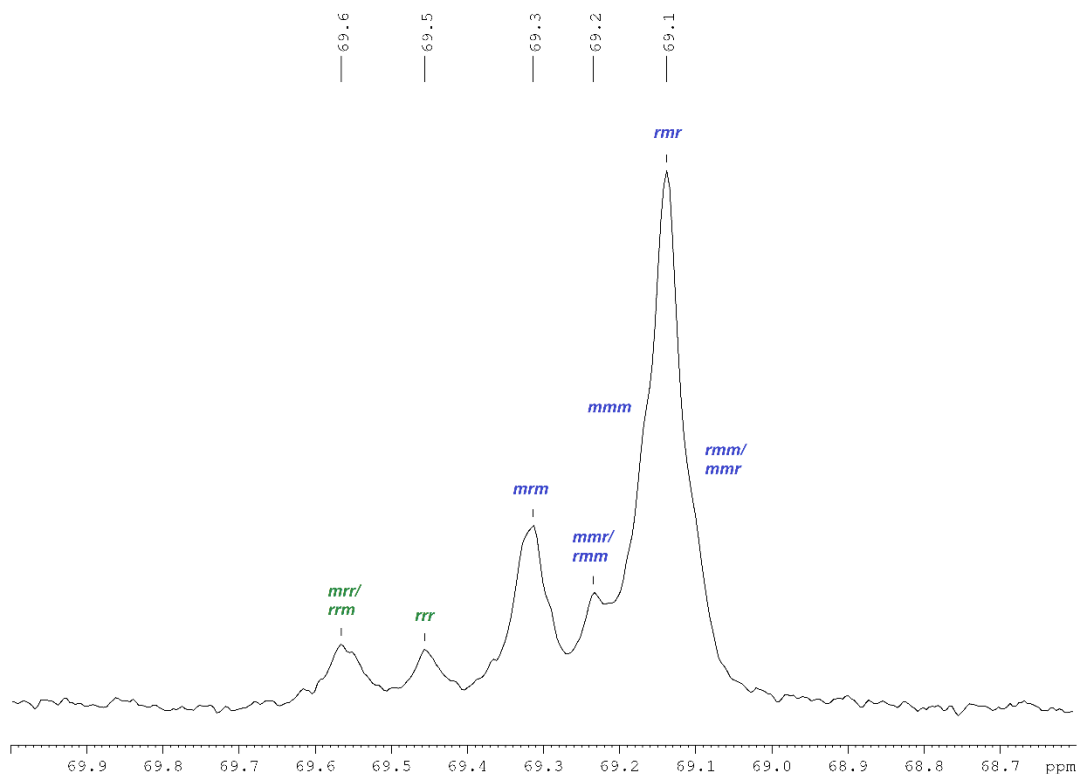

**Figure S55.** Methine region of the  $^{13}\text{C}\{^1\text{H}\}$  NMR (126 MHz,  $\text{CDCl}_3$ ) of poly(lactide) obtained from the polymerisation of *rac*-lactide with **5**.

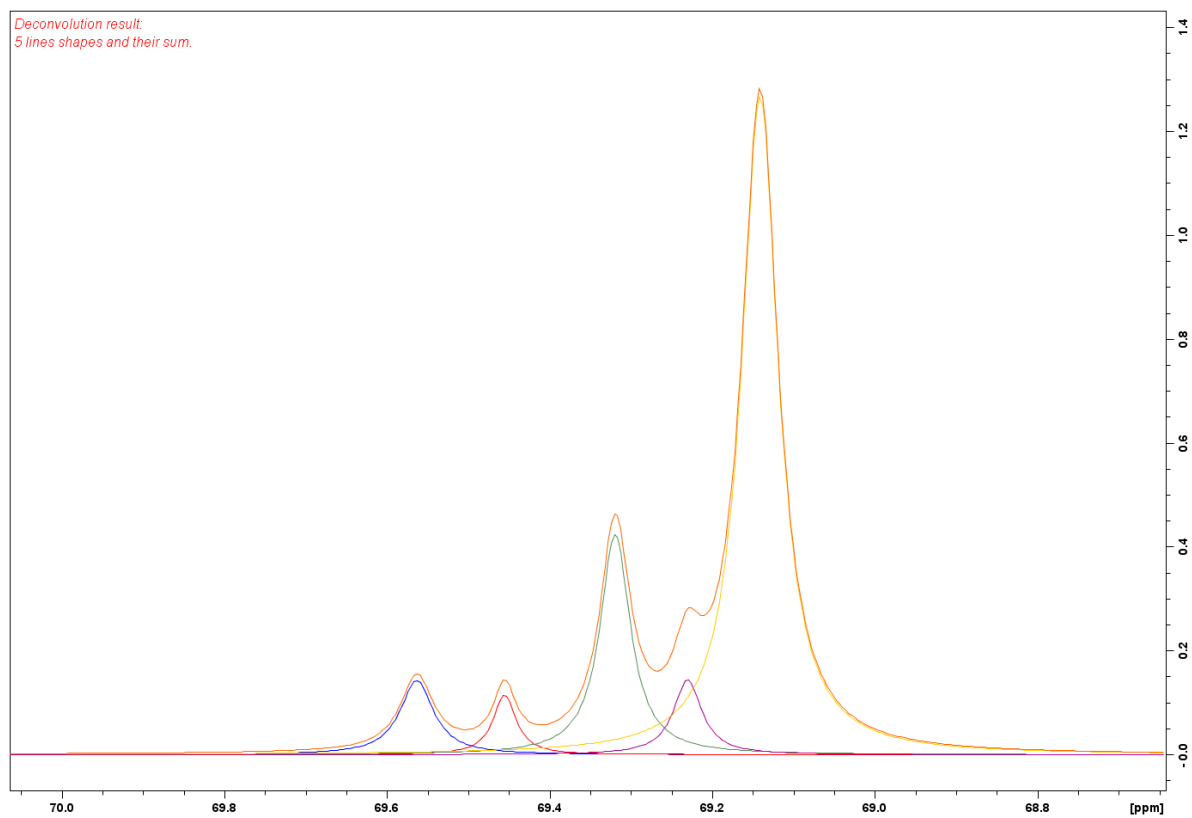

**Figure S56.** Deconvolution of the methine region of the  $^{13}\text{C}\{^1\text{H}\}$  NMR (126 MHz,  $\text{CDCl}_3$ ) of poly(lactide) obtained from the polymerisation of *rac*-lactide with **5**.



| Fit  | Frequency |         | Width   |       | Intensity | Area   | %Lor.<br>chisq |
|------|-----------|---------|---------|-------|-----------|--------|----------------|
|      | ppm       | Hz      | ppm     | Hz    |           |        |                |
| 1    |           |         |         |       |           |        | 1.5e+14        |
|      | 69.564    | 8751.52 | 0.04998 | 6.287 | 0.143     | 2.963  | 100.00         |
| STD: | 0.002     | 0.26    | 0.00653 | 0.822 | 0.012     |        |                |
|      | 69.456    | 8737.89 | 0.03415 | 4.297 | 0.115     | 1.624  | 100.00         |
| STD: | 0.002     | 0.27    | 0.00659 | 0.828 | 0.014     |        |                |
|      | 69.320    | 8720.87 | 0.04476 | 5.632 | 0.425     | 7.882  | 100.00         |
| STD: | 0.001     | 0.09    | 0.00218 | 0.275 | 0.013     |        |                |
|      | 69.231    | 8709.69 | 0.04205 | 5.290 | 0.144     | 2.501  | 100.00         |
| STD: | 0.002     | 0.25    | 0.00702 | 0.884 | 0.013     |        |                |
|      | 69.142    | 8698.42 | 0.05493 | 6.911 | 1.268     | 28.862 | 100.00         |
| STD: | 0.000     | 0.03    | 0.00083 | 0.104 | 0.011     |        |                |

Figure S57.  $^{13}\text{C}\{^1\text{H}\}$  NMR deconvolution results. Fit type: Mixed Lorentzian and Gaussian.

**Table S7.** Tetrad intensities derived from the  $^1\text{H}\{^1\text{H}\}$  and  $^{13}\text{C}\{^1\text{H}\}$  NMR spectra.

|                                                                                                                                                                                                                                                             | $P_{rnr}$          | $P_{rnm/mnr}$      | $\delta = 5.19$ ppm | $P_{mnr/rnm}$      | $P_{mmm}$           | $P_{mrm}$          | $P_{rrr}$          | $P_{rrm}$          | $P_{mrm}$          |
|-------------------------------------------------------------------------------------------------------------------------------------------------------------------------------------------------------------------------------------------------------------|--------------------|--------------------|---------------------|--------------------|---------------------|--------------------|--------------------|--------------------|--------------------|
| <b>Area from deconvolution (<math>^1\text{H}</math> or <math>^{13}\text{C}\{^1\text{H}\}</math> NMR)</b>                                                                                                                                                    | 3.182 <sup>a</sup> | 6.840 <sup>a</sup> | 0.000 <sup>a</sup>  | 6.147 <sup>a</sup> | 15.183 <sup>a</sup> | 8.574 <sup>a</sup> | 1.624 <sup>b</sup> | 2.963 <sup>b</sup> | 7.882 <sup>b</sup> |
| <b>Intensity in <math>^1\text{H}</math> NMR (normalized) and relative intensity in <math>^{13}\text{C}\{^1\text{H}\}</math> NMR (by equating <math>P_{mrm}</math> values from <math>^1\text{H}</math> and <math>^{13}\text{C}\{^1\text{H}\}</math> NMR)</b> | 0.0797             | 0.1713             | 0.000               | 0.1540             | 0.3803              | 0.2147             | 0.0442             | 0.0807             | 0.2147             |
| <b>Relative intensities (normalized)</b>                                                                                                                                                                                                                    | 0.07085074         | 0.1522802          | 0                   | 0.13690106         | 0.3380745           | 0.19086141         | 0.03929238         | 0.07173971         |                    |
| $P_m$                                                                                                                                                                                                                                                       |                    |                    |                     |                    | 0.5053              | 0.5705             |                    |                    |                    |

<sup>a</sup> from  $^1\text{H}$  NMR. <sup>b</sup> from  $^{13}\text{C}\{^1\text{H}\}$  NMR.

Average:  $P_m = 0.5379$

## 2.4.7. Polymerisation of *rac*-lactide with compound 6

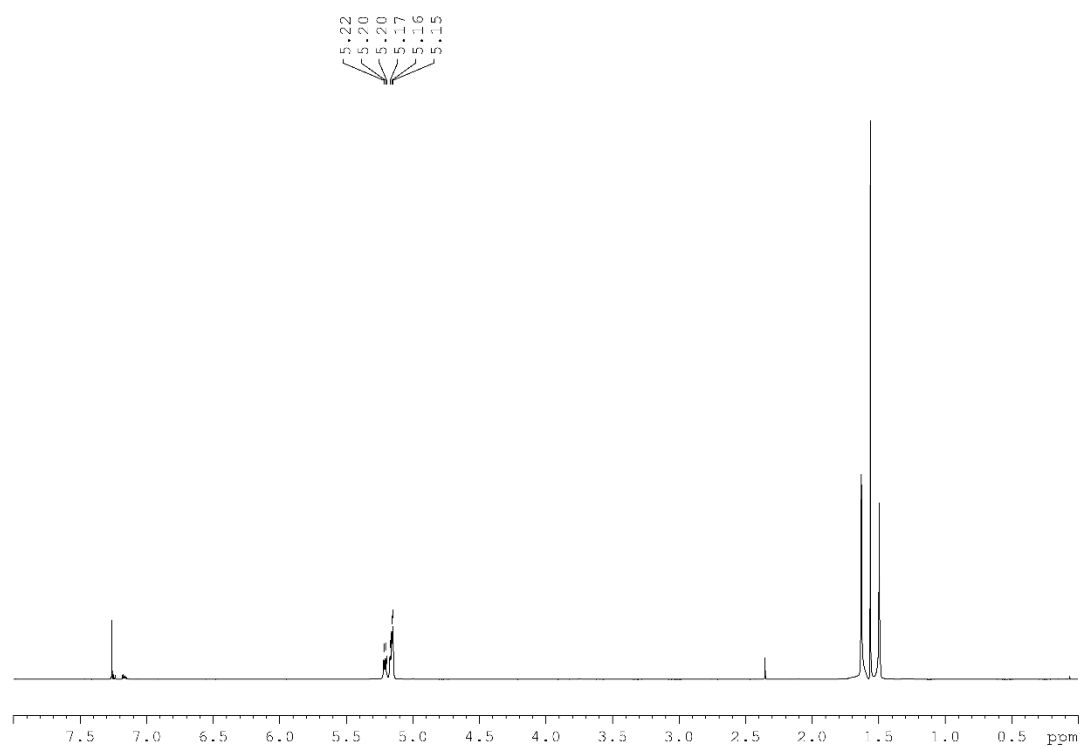

**Figure S58.** Homodecoupled  $^1\text{H}\{^1\text{H}\}$  NMR spectrum (500 MHz,  $\text{CDCl}_3$ ) of poly(lactide) obtained from the polymerisation of *rac*-lactide with 6.

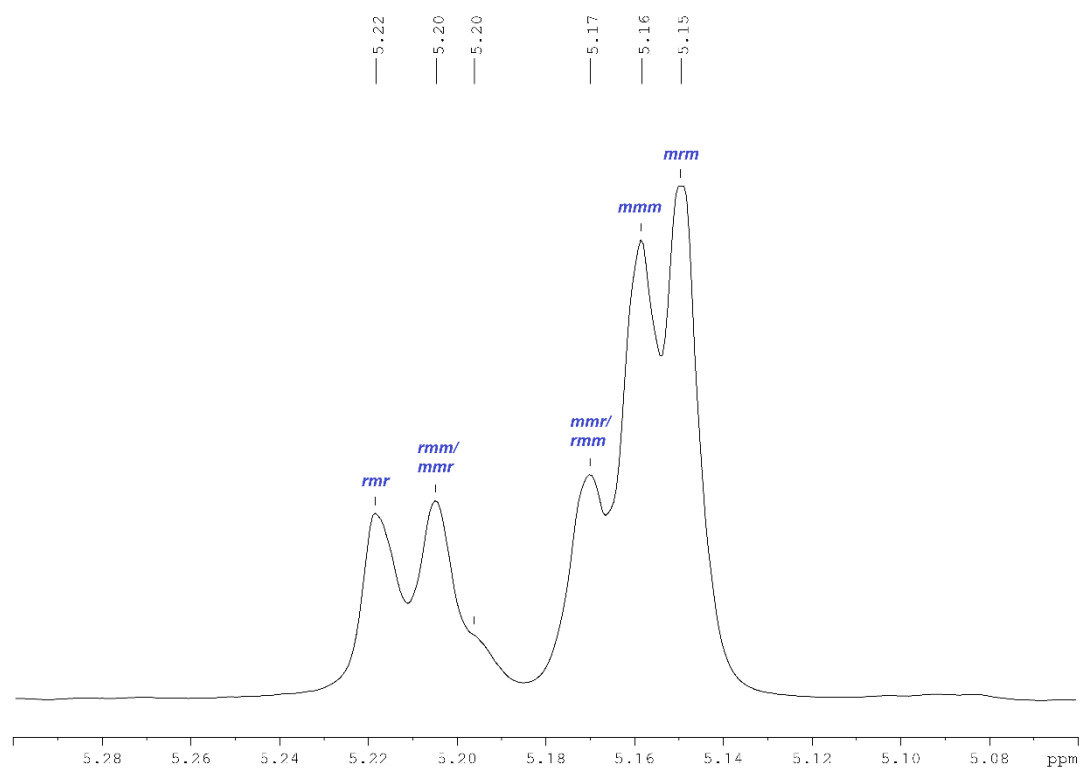

**Figure S59.** Methine region of the homodecoupled  $^1\text{H}\{^1\text{H}\}$  NMR spectrum (500 MHz,  $\text{CDCl}_3$ ) of poly(lactide) obtained from the polymerisation of *rac*-lactide with 6.

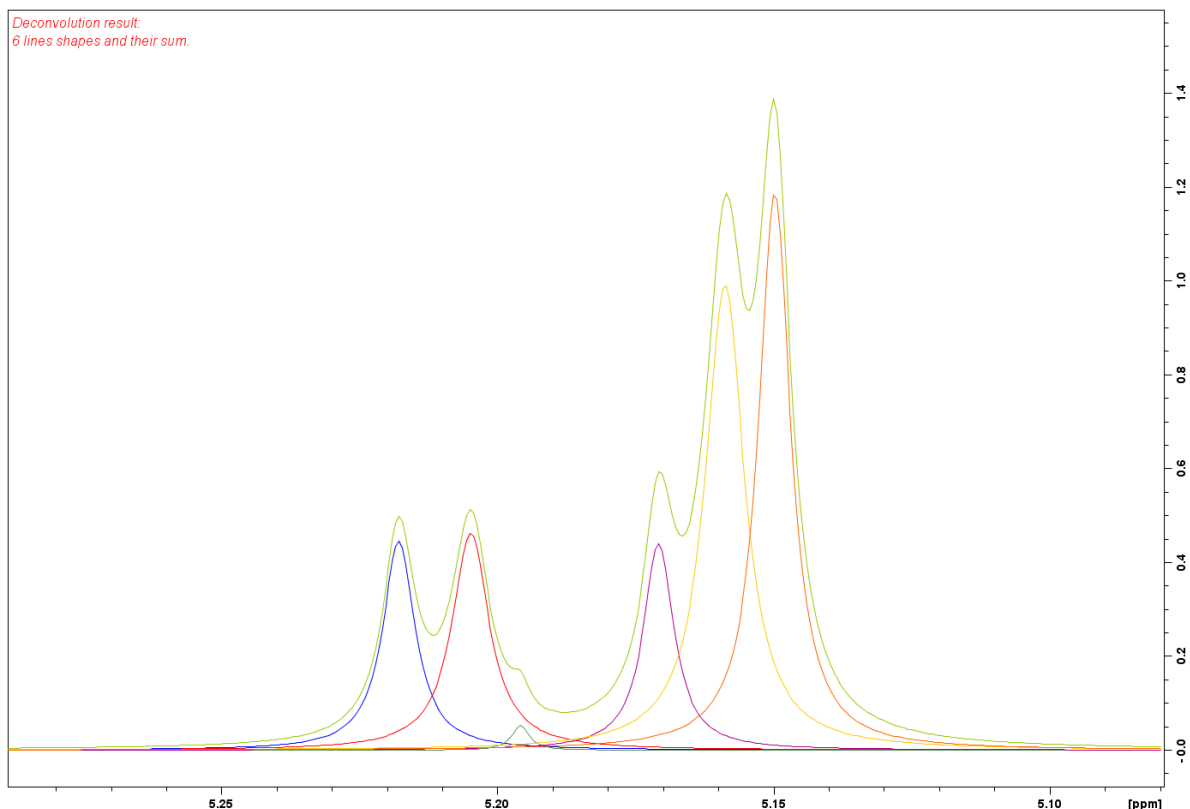

**Figure S60.** Deconvolution of the homodecoupled  $^1\text{H}\{^1\text{H}\}$  NMR spectrum (500 MHz,  $\text{CDCl}_3$ ) of poly(lactide) obtained from the polymerisation of *rac*-lactide with **6**.

| Fit         | Frequency |         | Width   |       | Intensity |        | Area           | %Lor.<br>chisq |
|-------------|-----------|---------|---------|-------|-----------|--------|----------------|----------------|
|             | ppm       | Hz      | ppm     | Hz    | Hz        | Hz     |                |                |
| <b>1</b>    |           |         |         |       |           |        | <b>1.3e+14</b> |                |
|             | 5.218     | 2610.71 | 0.00707 | 3.535 | 0.446     | 8.109  | 100.00         |                |
| <b>STD:</b> | 0.000     | 0.07    | 0.00043 | 0.216 | 0.016     |        |                |                |
|             | 5.205     | 2604.20 | 0.00809 | 4.047 | 0.463     | 9.636  | 100.00         |                |
| <b>STD:</b> | 0.000     | 0.07    | 0.00057 | 0.283 | 0.015     |        |                |                |
|             | 5.196     | 2599.43 | 0.00369 | 1.844 | 0.053     | 0.504  | 100.00         |                |
| <b>STD:</b> | 0.001     | 0.39    | 0.00262 | 1.312 | 0.022     |        |                |                |
|             | 5.171     | 2587.28 | 0.00669 | 3.346 | 0.440     | 7.587  | 100.00         |                |
| <b>STD:</b> | 0.000     | 0.07    | 0.00045 | 0.226 | 0.017     |        |                |                |
|             | 5.159     | 2581.30 | 0.00853 | 4.270 | 0.992     | 21.810 | 100.00         |                |
| <b>STD:</b> | 0.000     | 0.04    | 0.00034 | 0.169 | 0.015     |        |                |                |
|             | 5.150     | 2576.45 | 0.00698 | 3.491 | 1.188     | 21.350 | 100.00         |                |
| <b>STD:</b> | 0.000     | 0.03    | 0.00019 | 0.096 | 0.018     |        |                |                |

**Figure S61.**  $^1\text{H}\{^1\text{H}\}$  NMR deconvolution results. Fit type: Mixed Lorentzian and Gaussian.

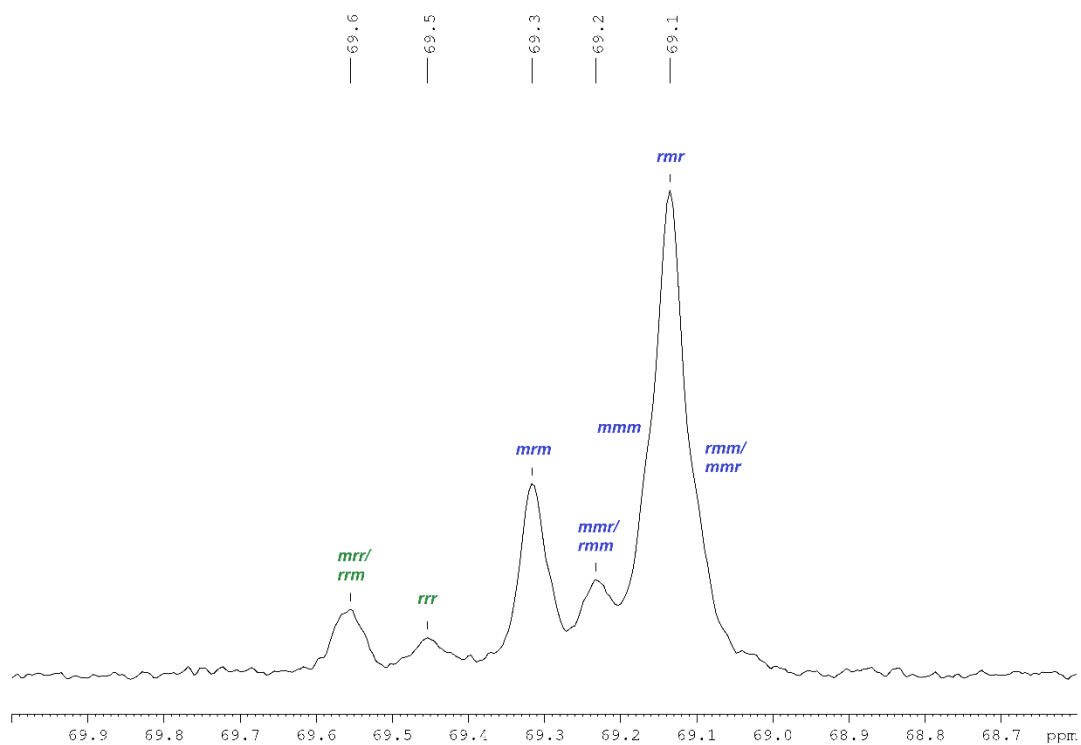

**Figure S62.** Methine region of the  $^{13}\text{C}\{^1\text{H}\}$  NMR (126 MHz,  $\text{CDCl}_3$ ) of poly(lactide) obtained from the polymerisation of *rac*-lactide with **6**.

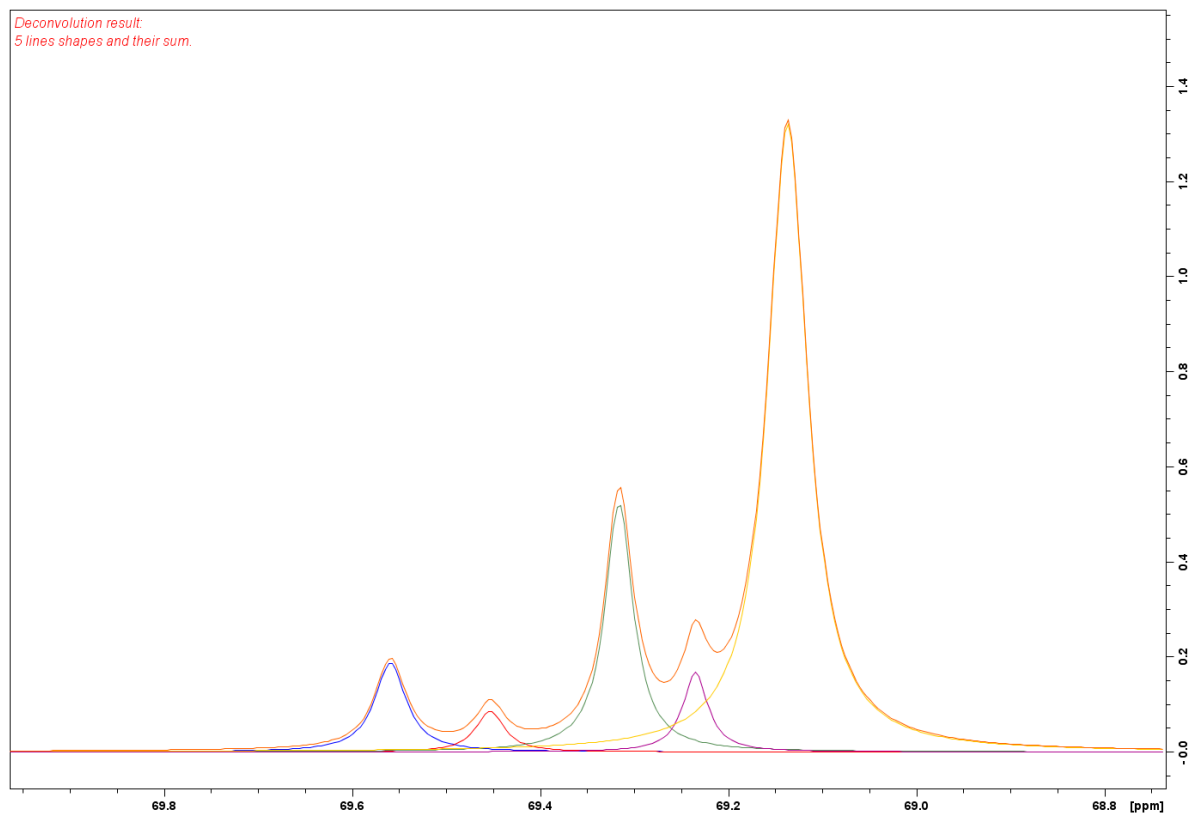

**Figure S63.** Deconvolution of the methine region of the  $^{13}\text{C}\{^1\text{H}\}$  NMR (126 MHz,  $\text{CDCl}_3$ ) of poly(lactide) obtained from the polymerisation of *rac*-lactide with **6**.

| Fit         | Frequency     |                | Width          |              | Intensity    | Area          | %Lor.<br>chisq |
|-------------|---------------|----------------|----------------|--------------|--------------|---------------|----------------|
|             | ppm           | Hz             | ppm            | Hz           | Hz           |               |                |
| <b>1</b>    |               |                |                |              |              |               | <b>9.2e+13</b> |
|             | <b>69.560</b> | <b>8751.08</b> | <b>0.04036</b> | <b>5.077</b> | <b>0.187</b> | <b>3.132</b>  | <b>100.00</b>  |
| <b>STD:</b> | <b>0.001</b>  | <b>0.14</b>    | <b>0.00339</b> | <b>0.427</b> | <b>0.010</b> |               |                |
|             | <b>69.454</b> | <b>8737.72</b> | <b>0.03657</b> | <b>4.601</b> | <b>0.086</b> | <b>1.304</b>  | <b>100.00</b>  |
| <b>STD:</b> | <b>0.002</b>  | <b>0.29</b>    | <b>0.00709</b> | <b>0.892</b> | <b>0.011</b> |               |                |
|             | <b>69.317</b> | <b>8720.49</b> | <b>0.03598</b> | <b>4.526</b> | <b>0.523</b> | <b>7.803</b>  | <b>100.00</b>  |
| <b>STD:</b> | <b>0.000</b>  | <b>0.05</b>    | <b>0.00119</b> | <b>0.150</b> | <b>0.011</b> |               |                |
|             | <b>69.236</b> | <b>8710.22</b> | <b>0.03194</b> | <b>4.018</b> | <b>0.168</b> | <b>2.224</b>  | <b>100.00</b>  |
| <b>STD:</b> | <b>0.001</b>  | <b>0.14</b>    | <b>0.00366</b> | <b>0.461</b> | <b>0.012</b> |               |                |
|             | <b>69.138</b> | <b>8697.89</b> | <b>0.05127</b> | <b>6.450</b> | <b>1.321</b> | <b>28.074</b> | <b>100.00</b>  |
| <b>STD:</b> | <b>0.000</b>  | <b>0.02</b>    | <b>0.00056</b> | <b>0.071</b> | <b>0.009</b> |               |                |

**Figure S64.**  $^{13}\text{C}\{^1\text{H}\}$  NMR deconvolution results. Fit type: Mixed Lorentzian and Gaussian.

**Table S8.** Tetrad intensities derived from the  $^1\text{H}\{^1\text{H}\}$  and  $^{13}\text{C}\{^1\text{H}\}$  NMR spectra.

|                                                                                                                                                                                                                                                             | $P_{rmr}$          | $P_{rmm/mmr}$      | $\delta = 5.19$ ppm | $P_{mmr/rmm}$      | $P_{mmm}$           | $P_{mrm}$           | $P_{rrr}$          | $P_{rrm}$          | $P_{mrm}$          |
|-------------------------------------------------------------------------------------------------------------------------------------------------------------------------------------------------------------------------------------------------------------|--------------------|--------------------|---------------------|--------------------|---------------------|---------------------|--------------------|--------------------|--------------------|
| <b>Area from deconvolution (<math>^1\text{H}</math> or <math>^{13}\text{C}\{^1\text{H}\}</math> NMR)</b>                                                                                                                                                    | 8.109 <sup>a</sup> | 9.636 <sup>a</sup> | 0.504 <sup>a</sup>  | 7.587 <sup>a</sup> | 21.810 <sup>a</sup> | 21.350 <sup>a</sup> | 1.304 <sup>b</sup> | 3.132 <sup>b</sup> | 7.803 <sup>b</sup> |
| <b>Intensity in <math>^1\text{H}</math> NMR (normalized) and relative intensity in <math>^{13}\text{C}\{^1\text{H}\}</math> NMR (by equating <math>P_{mrm}</math> values from <math>^1\text{H}</math> and <math>^{13}\text{C}\{^1\text{H}\}</math> NMR)</b> | 0.1175             | 0.1397             | 0.0073              | 0.1100             | 0.3161              | 0.3094              | 0.0517             | 0.1242             | 0.3094             |
| <b>Relative intensities (normalized)</b>                                                                                                                                                                                                                    | 0.09992346         | 0.11880262         | 0.00620801          | 0.09354537         | 0.26881538          | 0.26311761          | 0.04396632         | 0.10562123         |                    |
| $P_m$                                                                                                                                                                                                                                                       |                    |                    |                     |                    | 0.4393              | 0.3811              |                    |                    |                    |

<sup>a</sup> from  $^1\text{H}$  NMR. <sup>b</sup> from  $^{13}\text{C}\{^1\text{H}\}$  NMR.

Average:  $P_m = 0.4102$

### 3. Kinetic studies

The rate law for a second-order reaction is:

$$-\frac{dc_{LA}}{dt} = k \cdot c_{LA}^2 \cdot c_{cat0}^b = k_{obs} \cdot c_{LA}^2 \quad (3)$$

$$\frac{dc_{LA}}{c_{LA}^2} = -k_{obs} \cdot dt \quad (4)$$

$$\int_0^{c_{LA}} \frac{dc_{LA}}{c_{LA}^2} = \int_0^t -k_{obs} dt \quad (5)$$

$$\frac{1}{c_{LA}} = k_{obs} \cdot t \quad (6)$$

$$\text{with: } k_{obs} = k \cdot c_{cat0}^b$$

From the plot of  $1/c_{LA}$  and the time,  $k_{obs}$  can be calculated.

The polymerisation progress was monitored by  $^1\text{H}$  NMR spectroscopy using the methine resonances of *rac*-lactide and poly(lactide). HMDSO was used as an internal standard. To calculate the actual polymer and monomer concentrations, the values obtained by relative integration to the HMDSO resonance set to 1 (Tables S9-S14, columns 3 and 5) were multiplied with  $(18 \cdot c_{HMDSO})$  (Tables S9-S14, columns 4 and 6).



**Table S9.** 1 mol%, 25 °C,  $c_{\text{HMDSO}} = 0.007 \text{ mol/l}$ .

| Time<br>min | Time /<br>h | c(polymer)<br>with<br>HMDSO<br>resonance<br>set to 1 | c(polymer) /<br>mol·l <sup>-1</sup> | c(monomer)<br>with HMDSO<br>resonance<br>set to 1 | c(monomer)<br>/ mol·l <sup>-1</sup> | 1/c(monomer) /<br>l·mol <sup>-1</sup> |
|-------------|-------------|------------------------------------------------------|-------------------------------------|---------------------------------------------------|-------------------------------------|---------------------------------------|
| 0           | 0           | 0.0402                                               | 0.00507                             | 1.9933                                            | 0.25116                             | 3.98159                               |
| 68          | 1.13333     | 0.3323                                               | 0.04187                             | 1.7277                                            | 0.21769                             | 4.59368                               |
| 147         | 2.45        | 0.491                                                | 0.06187                             | 1.5919                                            | 0.20058                             | 4.98556                               |
| 220         | 3.66667     | 0.5664                                               | 0.07137                             | 1.5137                                            | 0.19073                             | 5.24312                               |
| 298         | 4.96667     | 0.6676                                               | 0.08412                             | 1.4337                                            | 0.18065                             | 5.53568                               |
| 356         | 5.93333     | 0.7138                                               | 0.08994                             | 1.4024                                            | 0.1767                              | 5.65923                               |
| 402         | 6.7         | 0.7369                                               | 0.09285                             | 1.3728                                            | 0.17297                             | 5.78126                               |

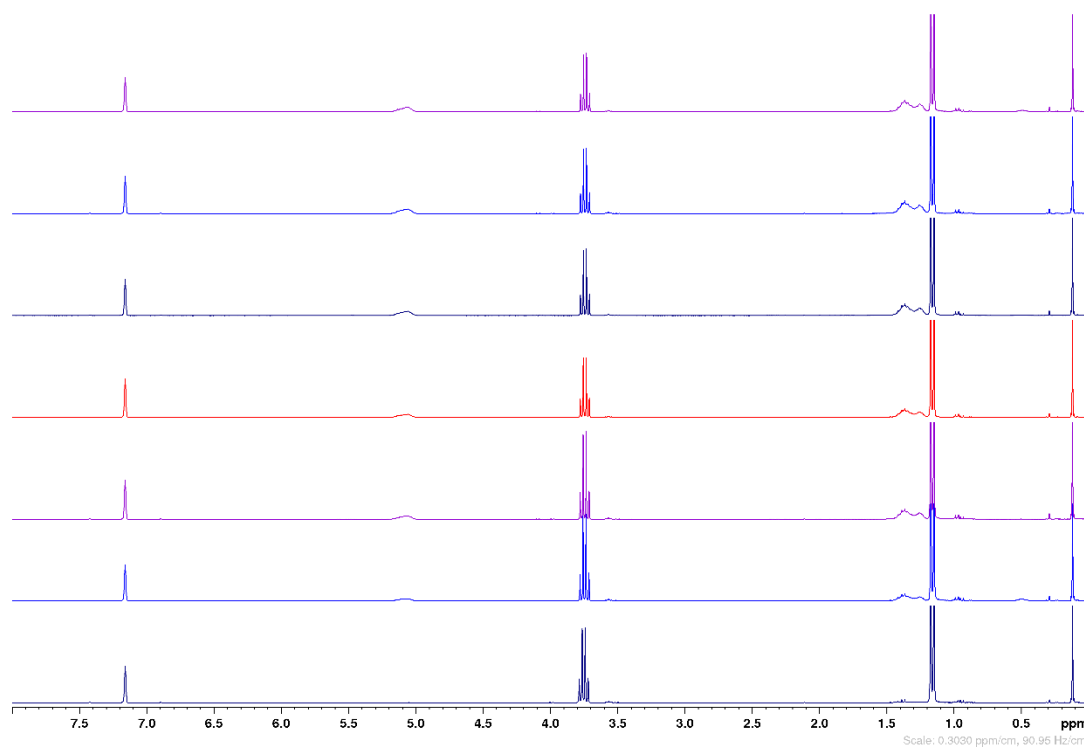

**Figure S65.** <sup>1</sup>H NMR spectra (300 MHz, CDCl<sub>3</sub>) for the polymerisation of *rac*-lactide with complex **2** (1 mol%) at 25 °C between t = 0 min (bottom spectrum) and t = 402 min (top spectrum).

**Table S10.** 2 mol%, 25 °C,  $c_{\text{HMDSO}} = 0.062 \text{ mol/l}$ .

| Time / min | Time / h | c(polymer) with HMDSO resonance set to 1 | c(polymer) / mol·l <sup>-1</sup> | c(monomer) with HMDSO resonance set to 1 | c(monomer) / mol·l <sup>-1</sup> | 1/c(monomer) / l·mol <sup>-1</sup> |
|------------|----------|------------------------------------------|----------------------------------|------------------------------------------|----------------------------------|------------------------------------|
| 16         | 0.26667  | 0.3021                                   | 0.03371                          | 2.066                                    | 0.23057                          | 4.33716                            |
| 41         | 0.68333  | 0.8003                                   | 0.08931                          | 1.6479                                   | 0.18391                          | 5.43757                            |
| 93         | 1.55     | 1.4673                                   | 0.16375                          | 1.0629                                   | 0.11862                          | 8.43031                            |
| 151        | 2.51667  | 1.8368                                   | 0.20499                          | 0.7632                                   | 0.08517                          | 11.74079                           |
| 199        | 3.31667  | 2.1548                                   | 0.24048                          | 0.4853                                   | 0.05416                          | 18.46399                           |
| 289        | 4.81667  | 2.2938                                   | 0.25599                          | 0.3704                                   | 0.04134                          | 24.19161                           |
| 353        | 5.88333  | 2.3403                                   | 0.26118                          | 0.3137                                   | 0.03501                          | 28.56415                           |
| 409        | 6.81667  | 2.3839                                   | 0.26604                          | 0.2827                                   | 0.03155                          | 31.6964                            |
| 465        | 7.75     | 2.4146                                   | 0.26947                          | 0.2569                                   | 0.02867                          | 34.87962                           |

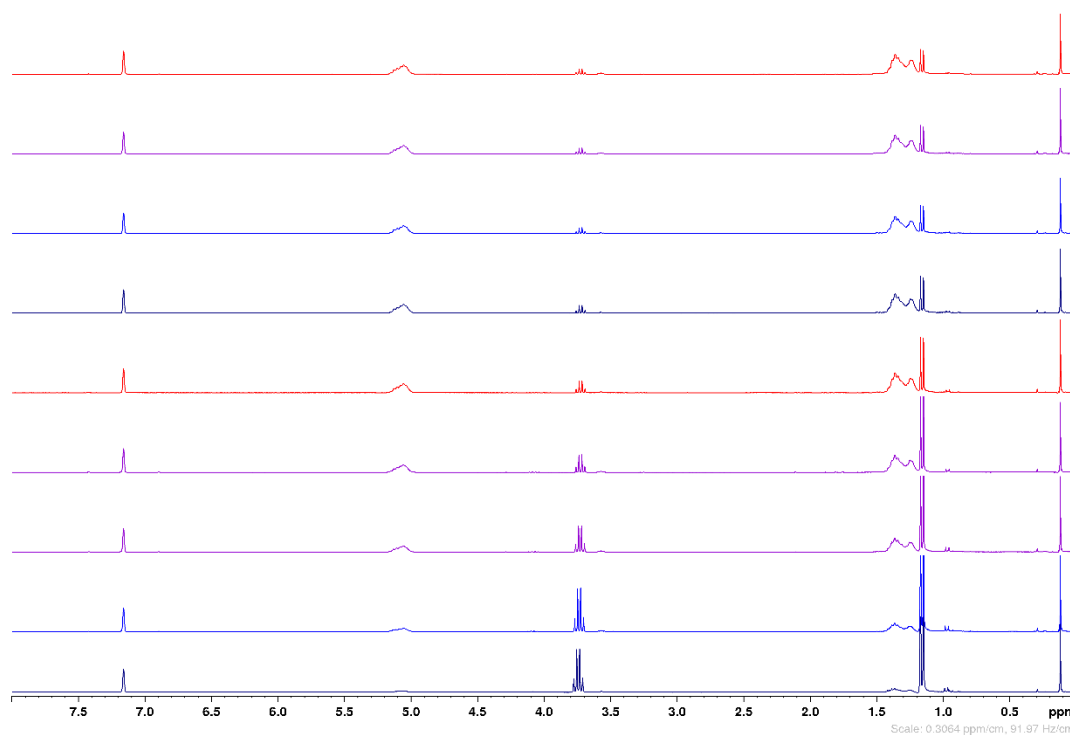

**Figure S66.** <sup>1</sup>H NMR spectra (300 MHz, CDCl<sub>3</sub>) for the polymerisation of *rac*-lactide with complex **2** (2 mol%) at 25 °C between  $t = 16 \text{ min}$  (bottom spectrum) and  $t = 465 \text{ min}$  (top spectrum).

**Table S11.** 4 mol%, 25 °C,  $c_{\text{HMDSO}} = 0.047 \text{ mol/l}$ .

| Time / min | Time / h | c(polymer) with HMDSO resonance set to 1 | c(polymer) / mol·l <sup>-1</sup> | c(monomer) with HMDSO resonance set to 1 | c(monomer) / mol·l <sup>-1</sup> | 1/c(monomer) / l·mol <sup>-1</sup> |
|------------|----------|------------------------------------------|----------------------------------|------------------------------------------|----------------------------------|------------------------------------|
| 26         | 0.43333  | 0.97                                     | 0.08206                          | 2.3436                                   | 0.19827                          | 5.04366                            |
| 47         | 0.78333  | 1.739                                    | 0.14712                          | 1.699                                    | 0.14374                          | 6.95723                            |
| 102        | 1.7      | 2.5784                                   | 0.21813                          | 1.0213                                   | 0.0864                           | 11.57381                           |
| 160        | 2.66667  | 2.9678                                   | 0.25108                          | 0.6924                                   | 0.05858                          | 17.07154                           |
| 208        | 3.46667  | 3.2801                                   | 0.2775                           | 0.4033                                   | 0.03412                          | 29.30903                           |
| 298        | 4.96667  | 3.3788                                   | 0.28585                          | 0.2612                                   | 0.0221                           | 45.25395                           |
| 362        | 6.03333  | 3.4054                                   | 0.2881                           | 0.2406                                   | 0.02035                          | 49.12856                           |
| 418        | 6.96667  | 3.3966                                   | 0.28735                          | 0.2088                                   | 0.01766                          | 56.61078                           |
| 474        | 7.9      | 3.4587                                   | 0.29261                          | 0.1857                                   | 0.01571                          | 63.65283                           |

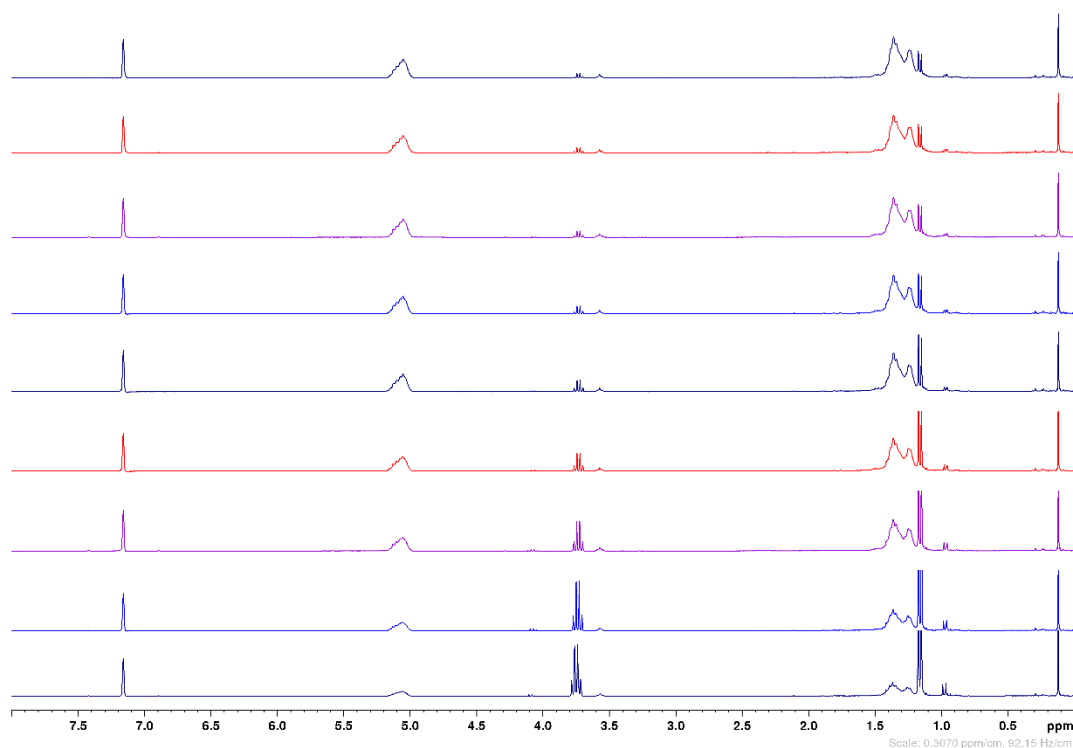

**Figure S67.** <sup>1</sup>H NMR spectra (300 MHz, CDCl<sub>3</sub>) for the polymerisation of *rac*-lactide with complex **2** (4 mol%) at 25 °C between t = 26 min (bottom spectrum) and t = 474 min (top spectrum).

**Table S12.** 6 mol%, 25 °C,  $c_{\text{HMDSO}} = 0.007 \text{ mol/l}$ .

| Time / min | Time / h | c(polymer) with HMDSO resonance set to 1 | c(polymer) / mol·l <sup>-1</sup> | c(monomer) with HMDSO resonance set to 1 | c(monomer) / mol·l <sup>-1</sup> | 1/c(monomer) / l·mol <sup>-1</sup> |
|------------|----------|------------------------------------------|----------------------------------|------------------------------------------|----------------------------------|------------------------------------|
| 15         | 0.25     | 0.3696                                   | 0.04657                          | 1.3553                                   | 0.17077                          | 5.8559                             |
| 87         | 1.45     | 1.4027                                   | 0.17674                          | 0.525                                    | 0.06615                          | 15.11716                           |
| 207        | 3.45     | 1.8091                                   | 0.22795                          | 0.2215                                   | 0.02791                          | 35.83074                           |
| 244        | 4.06667  | 1.6017                                   | 0.20181                          | 0.1409                                   | 0.01775                          | 56.32724                           |
| 290        | 4.83333  | 1.69                                     | 0.21294                          | 0.1378                                   | 0.01736                          | 57.5944                            |
| 371        | 6.18333  | 1.7753                                   | 0.22369                          | 0.1011                                   | 0.01274                          | 78.50156                           |
| 429        | 7.15     | 1.8004                                   | 0.22685                          | 0.0878                                   | 0.01106                          | 90.39303                           |
| 537        | 8.95     | 1.7863                                   | 0.22507                          | 0.0615                                   | 0.00775                          | 129.04891                          |

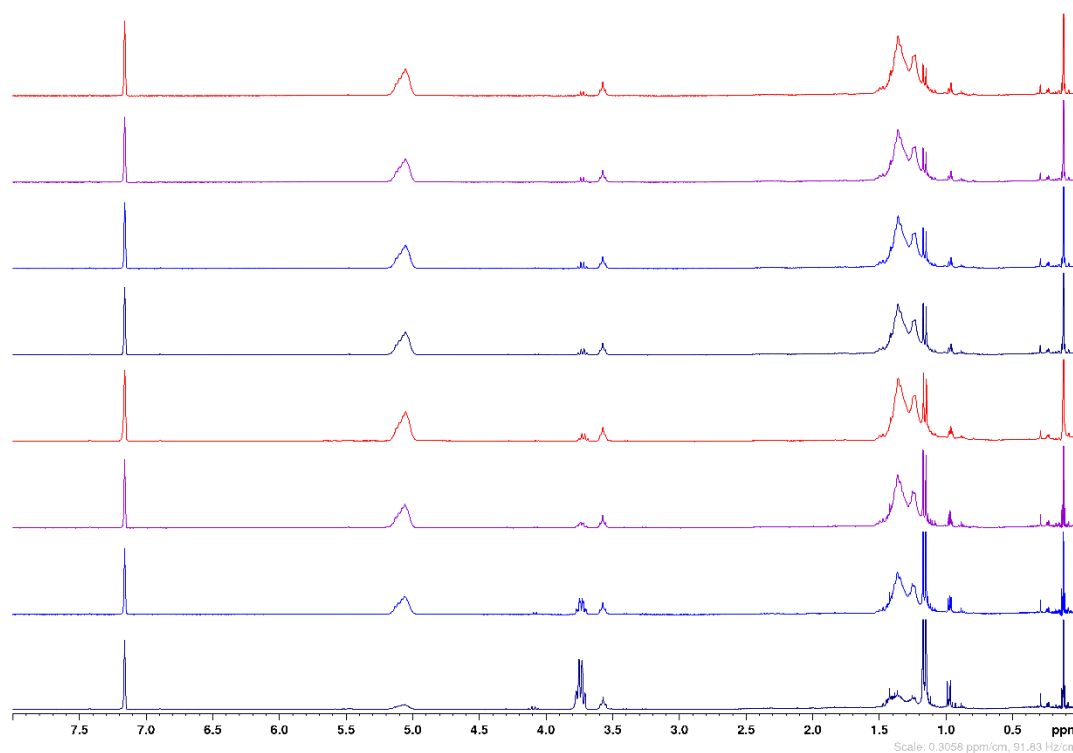

**Figure S68.** <sup>1</sup>H NMR spectra (300 MHz, CDCl<sub>3</sub>) for the polymerisation of *rac*-lactide with complex **2** (6 mol%) at 25 °C between  $t = 15 \text{ min}$  (bottom spectrum) and  $t = 537 \text{ min}$  (top spectrum).

**Table S13.** 2 mol%, 40 °C,  $c_{\text{HMDSO}} = 0.0062 \text{ mol/l}$ .

| Time / min | Time / h | c(polymer) with HMDSO resonance set to 1 | c(polymer) / mol·l <sup>-1</sup> | c(monomer) with HMDSO resonance set to 1 | c(monomer) / mol·l <sup>-1</sup> | 1/c(monomer) / l·mol <sup>-1</sup> |
|------------|----------|------------------------------------------|----------------------------------|------------------------------------------|----------------------------------|------------------------------------|
| 19         | 0.31667  | 0.4234                                   | 0.04725                          | 2.0959                                   | 0.2339                           | 4.27529                            |
| 131        | 2.18333  | 2.2001                                   | 0.24553                          | 0.4998                                   | 0.05578                          | 17.92832                           |
| 192        | 3.2      | 2.4163                                   | 0.26966                          | 0.317                                    | 0.03538                          | 28.26679                           |
| 297        | 4.95     | 2.5157                                   | 0.28075                          | 0.191                                    | 0.02132                          | 46.914                             |
| 387        | 6.45     | 2.5648                                   | 0.28623                          | 0.1534                                   | 0.01712                          | 58.41313                           |
| 441        | 7.35     | 2.5714                                   | 0.28697                          | 0.1387                                   | 0.01548                          | 64.60399                           |

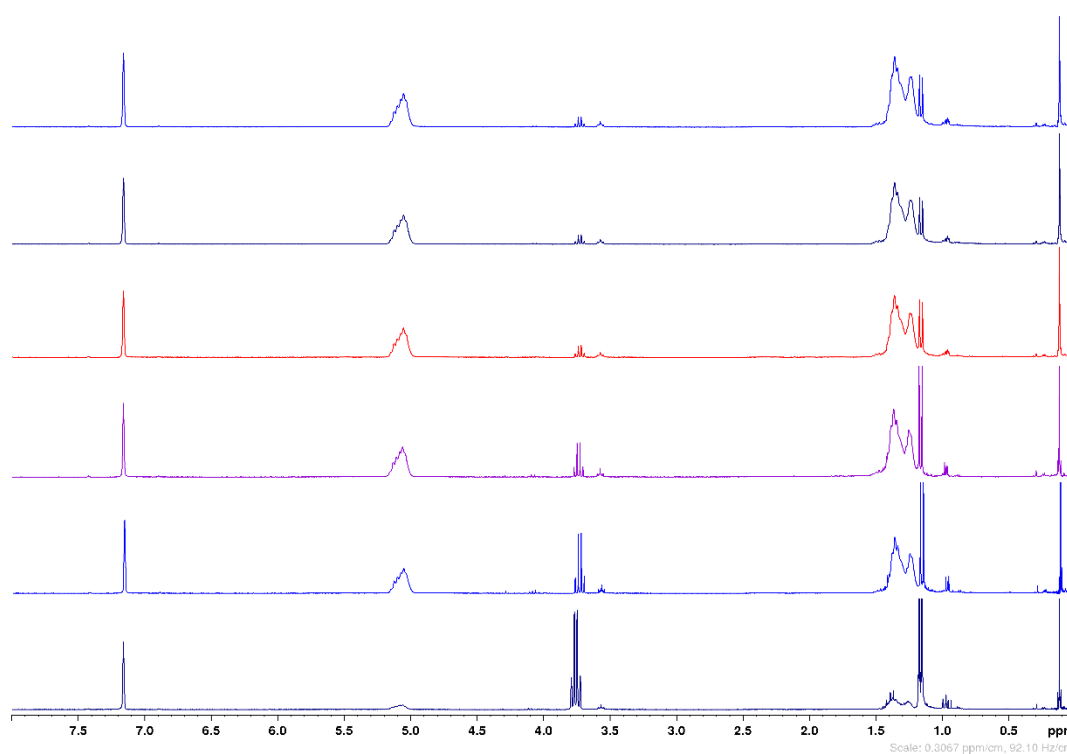

**Figure S69.** <sup>1</sup>H NMR spectra (300 MHz, CDCl<sub>3</sub>) for the polymerisation of *rac*-lactide with complex **2** (2 mol%) at 40 °C between t = 19 min (bottom spectrum) and t = 441 min (top spectrum).

**Table S14.** 2 mol%, 60 °C,  $c_{\text{HMDSO}} = 0.0062 \text{ mol/l}$ .

| Time / min | Time / h | c(polymer) with HMDSO resonance set to 1 | c(polymer) / mol·l <sup>-1</sup> | c(monomer) with HMDSO resonance set to 1 | c(monomer) / mol·l <sup>-1</sup> | 1/c(monomer) / l·mol <sup>-1</sup> |
|------------|----------|------------------------------------------|----------------------------------|------------------------------------------|----------------------------------|------------------------------------|
| 24         | 0.4      | 0.5678                                   | 0.06337                          | 1.7054                                   | 0.19032                          | 5.25424                            |
| 106        | 1.76667  | 2.0996                                   | 0.23432                          | 0.4288                                   | 0.04785                          | 20.89686                           |
| 198        | 3.3      | 2.3161                                   | 0.25848                          | 0.2472                                   | 0.02759                          | 36.24827                           |
| 306        | 5.1      | 2.3531                                   | 0.26261                          | 0.1954                                   | 0.02181                          | 45.85759                           |
| 395        | 6.58333  | 2.3876                                   | 0.26646                          | 0.1742                                   | 0.01944                          | 51.43842                           |
| 450        | 7.5      | 2.2762                                   | 0.25402                          | 0.1556                                   | 0.01736                          | 57.58723                           |

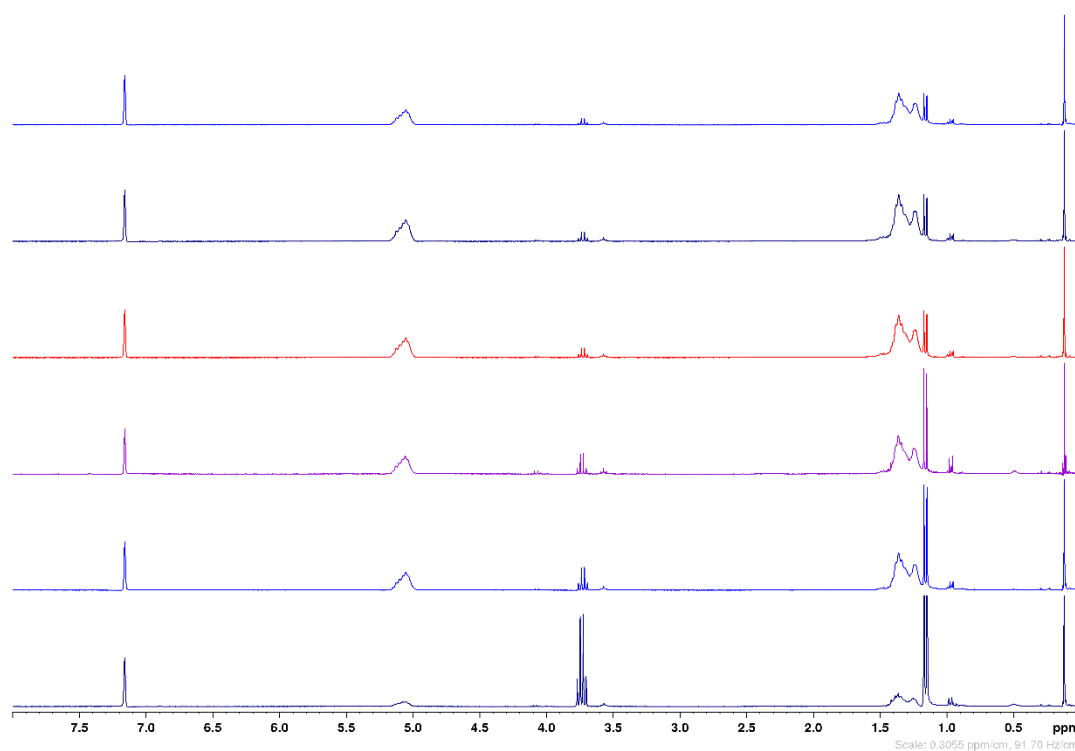

**Figure S70.** <sup>1</sup>H NMR spectra (300 MHz, CDCl<sub>3</sub>) for the polymerisation of *rac*-lactide with complex **2** (2 mol%) at 60 °C between t = 24 min (bottom spectrum) and t = 450 min (top spectrum).

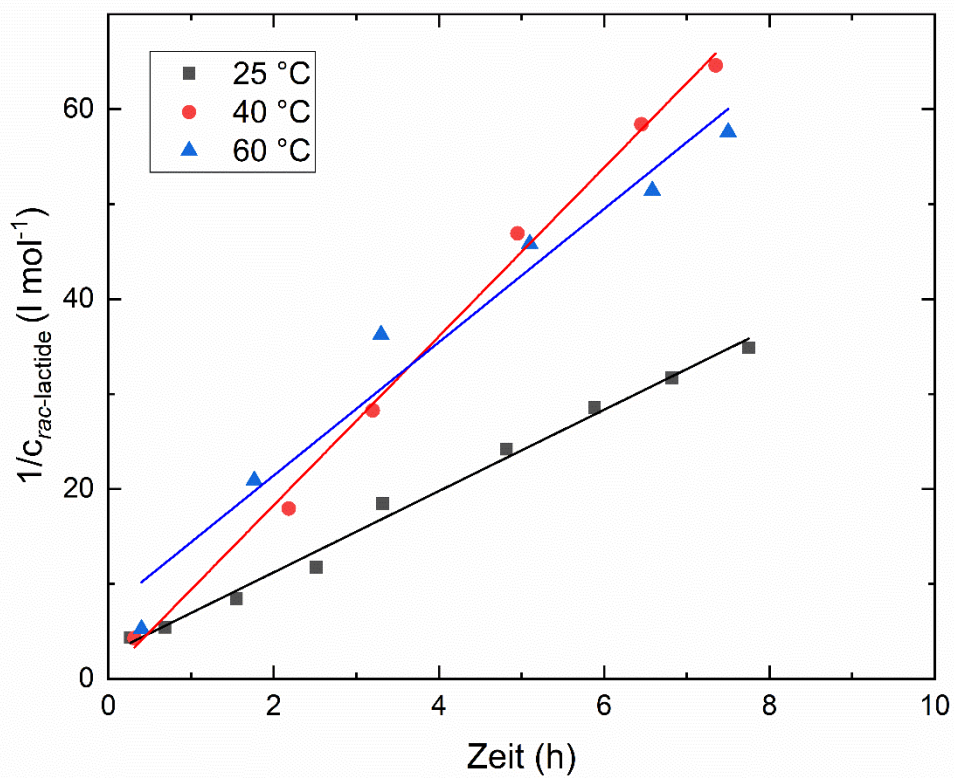

**Figure S71.** 2 mol% at 25 °C ( $k_{\text{obs}} = (4.2828 \pm 0.14563) \text{ l}\cdot\text{mol}^{-1}\cdot\text{h}^{-1}$ ), 40 °C ( $k_{\text{obs}} = (8.89423 \pm 0.30181) \text{ (l}\cdot\text{mol}^{-1}\cdot\text{h}^{-1})$ ) and 60 °C ( $k_{\text{obs}} = (7.02277 \pm 0.70192) \text{ (l}\cdot\text{mol}^{-1}\cdot\text{h}^{-1})$ ).

#### 4. Gel permeation chromatography

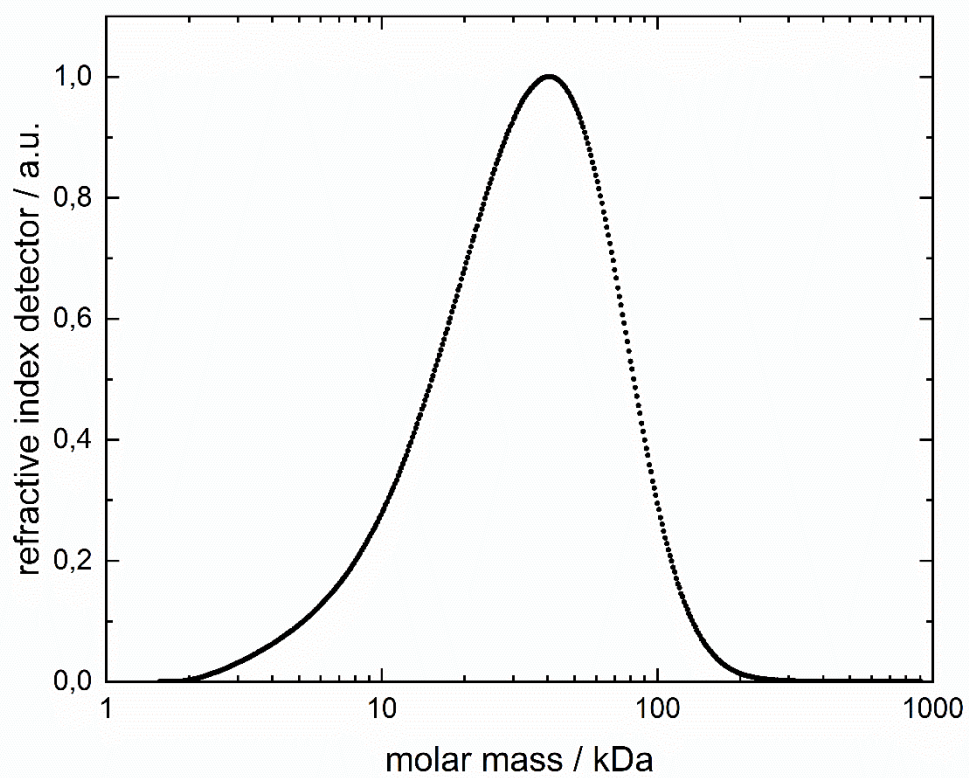

**Figure S72.** Elugram of poly(lactide) obtained from the polymerisation of *rac*-lactide with complex **2** at 50 °C.



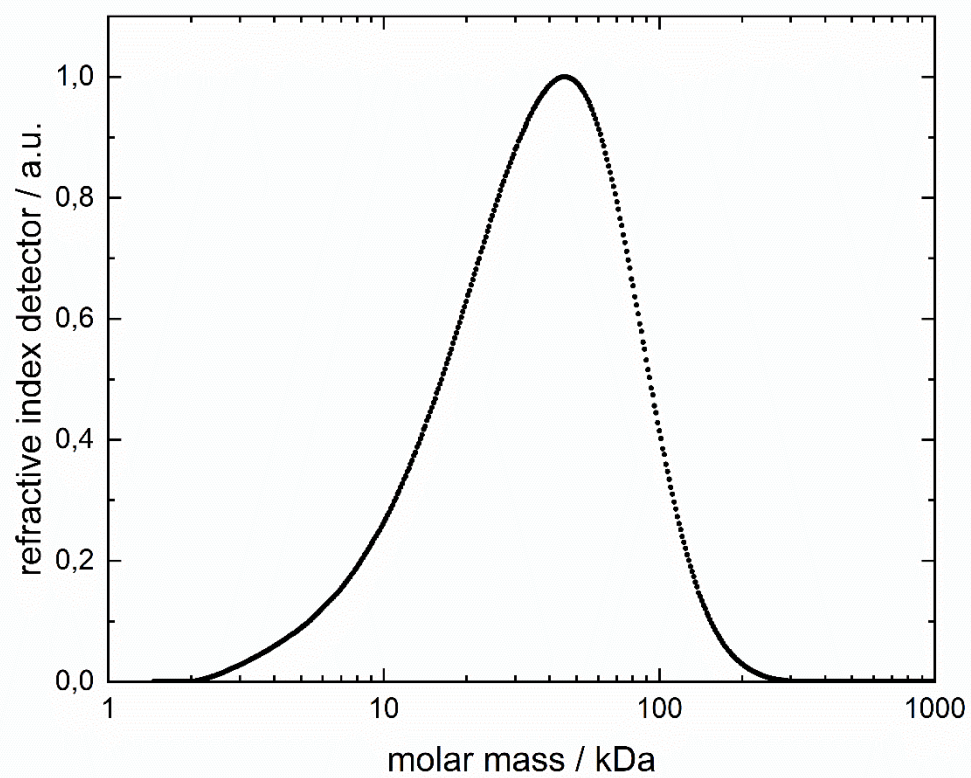

**Figure S73.** Elugram of poly(lactide) obtained from the polymerisation of *rac*-lactide with complex **2** at 30 °C.

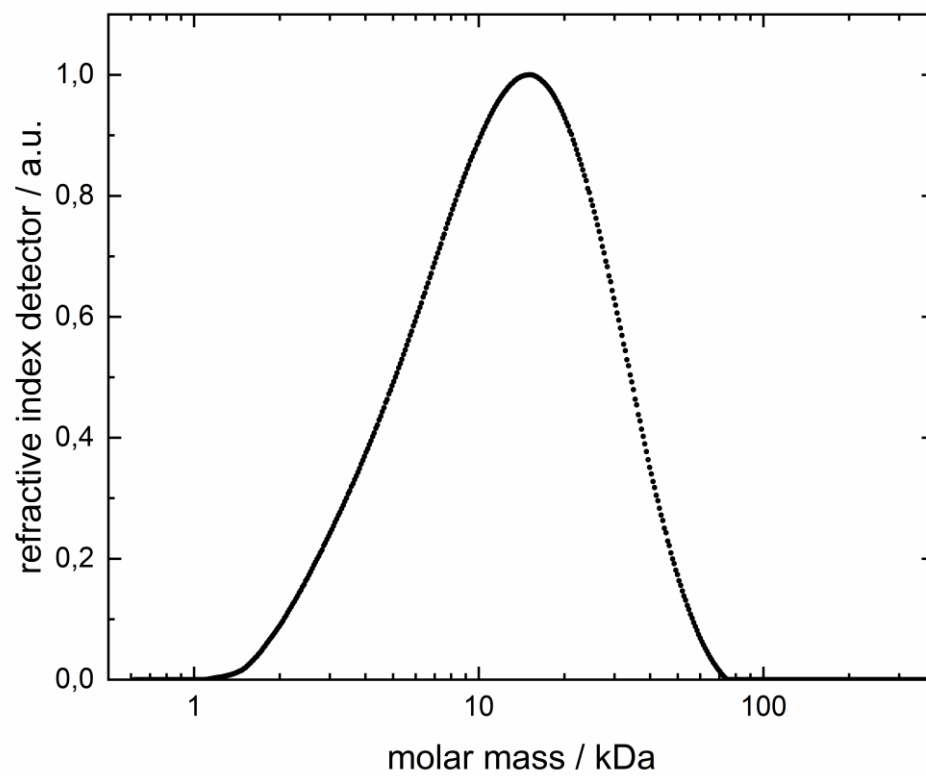

**Figure S74.** Elugram of poly(lactide) obtained from the polymerisation of *rac*-lactide with complex **3**.

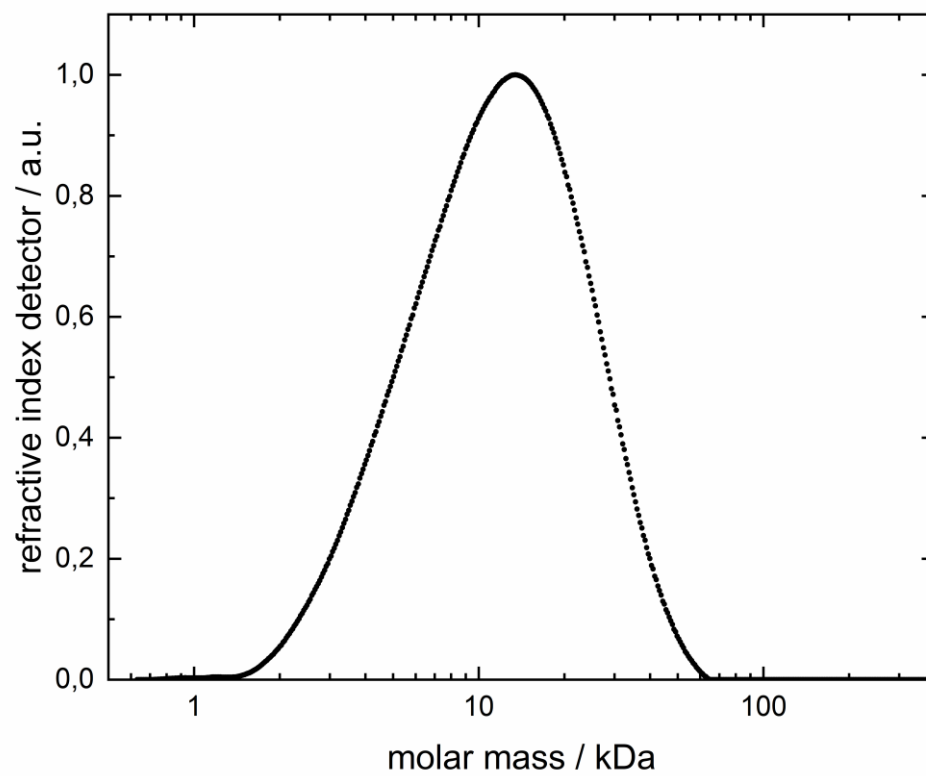

**Figure S75.** Elugram of poly(lactide) obtained from the polymerisation of *rac*-lactide with complex **4**.

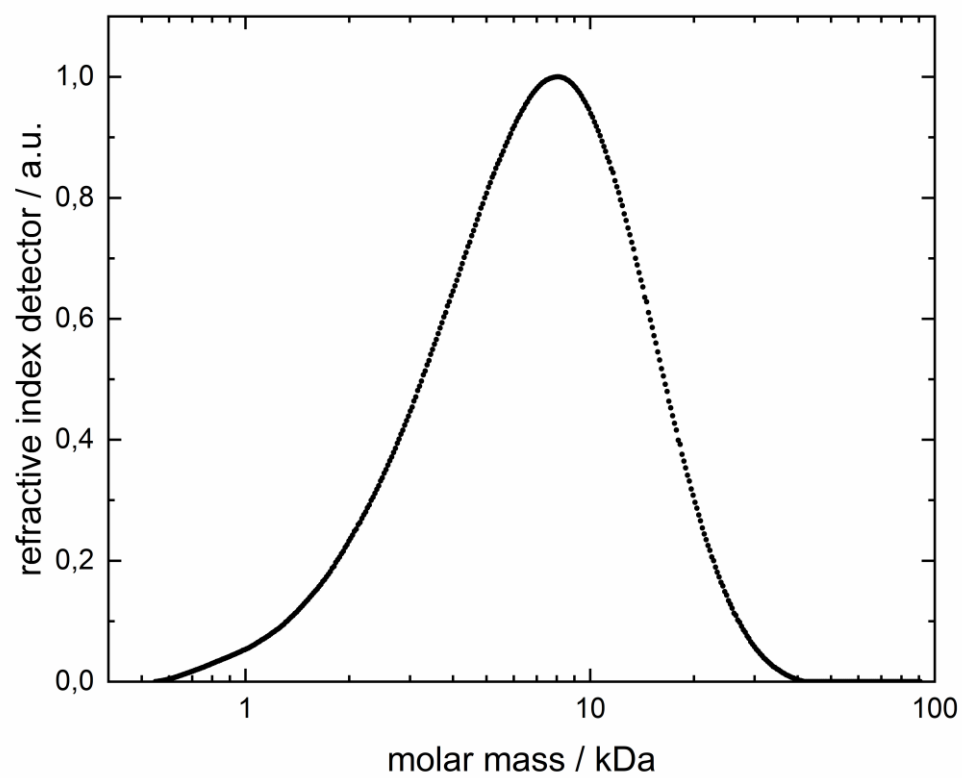

**Figure S76.** Elugram of poly(lactide) obtained from the polymerisation of *rac*-lactide with complex 5.

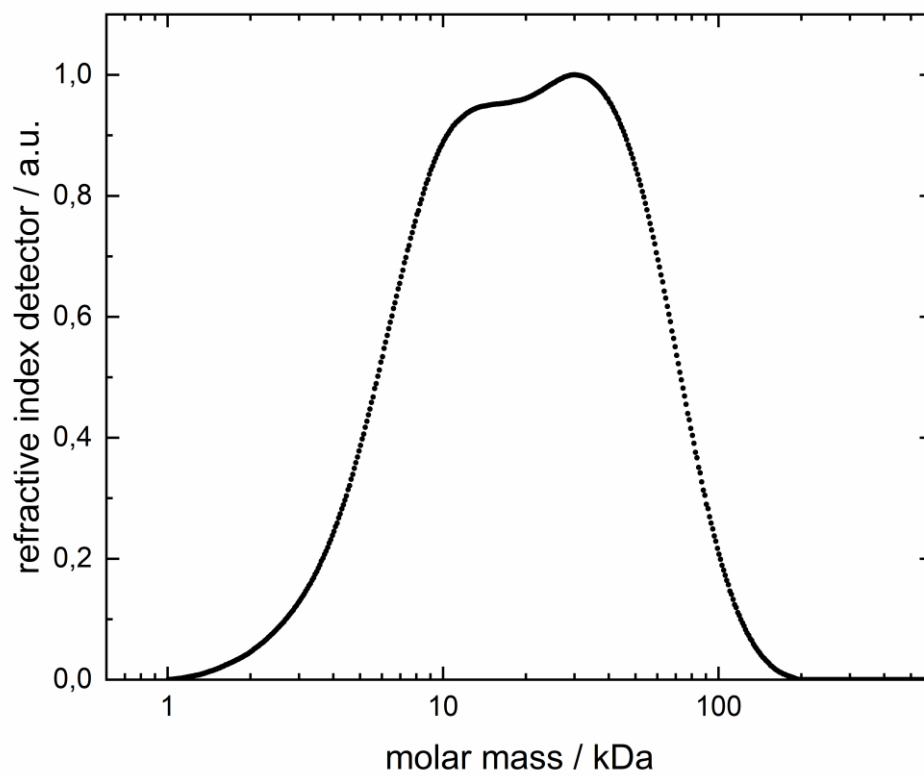

**Figure S77.** Elugram of poly(lactide) obtained from the polymerisation of *rac*-lactide with complex **6**.

## 5. Differential scanning calorimetry

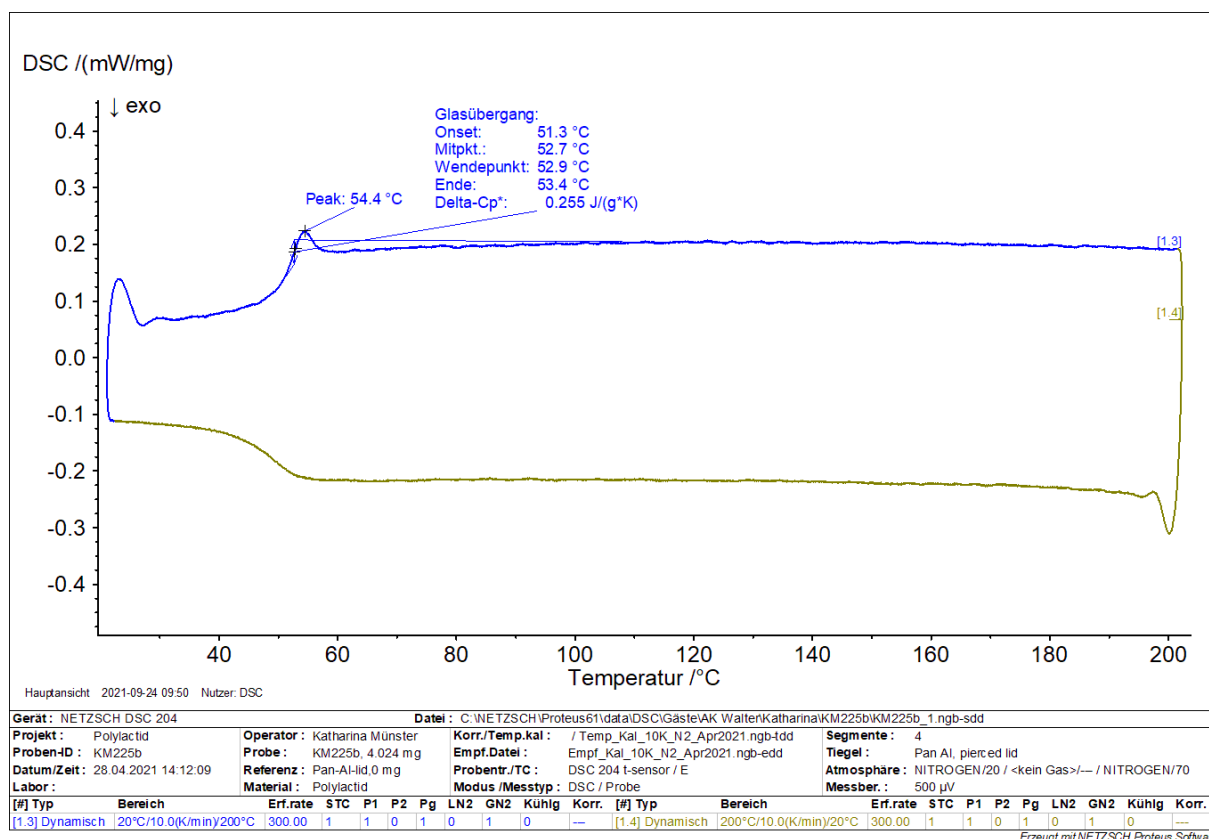

Figure S78. DSC thermogram of poly(lactide) obtained from the polymerisation of *rac*-lactide by complex 2 at 50 °C.

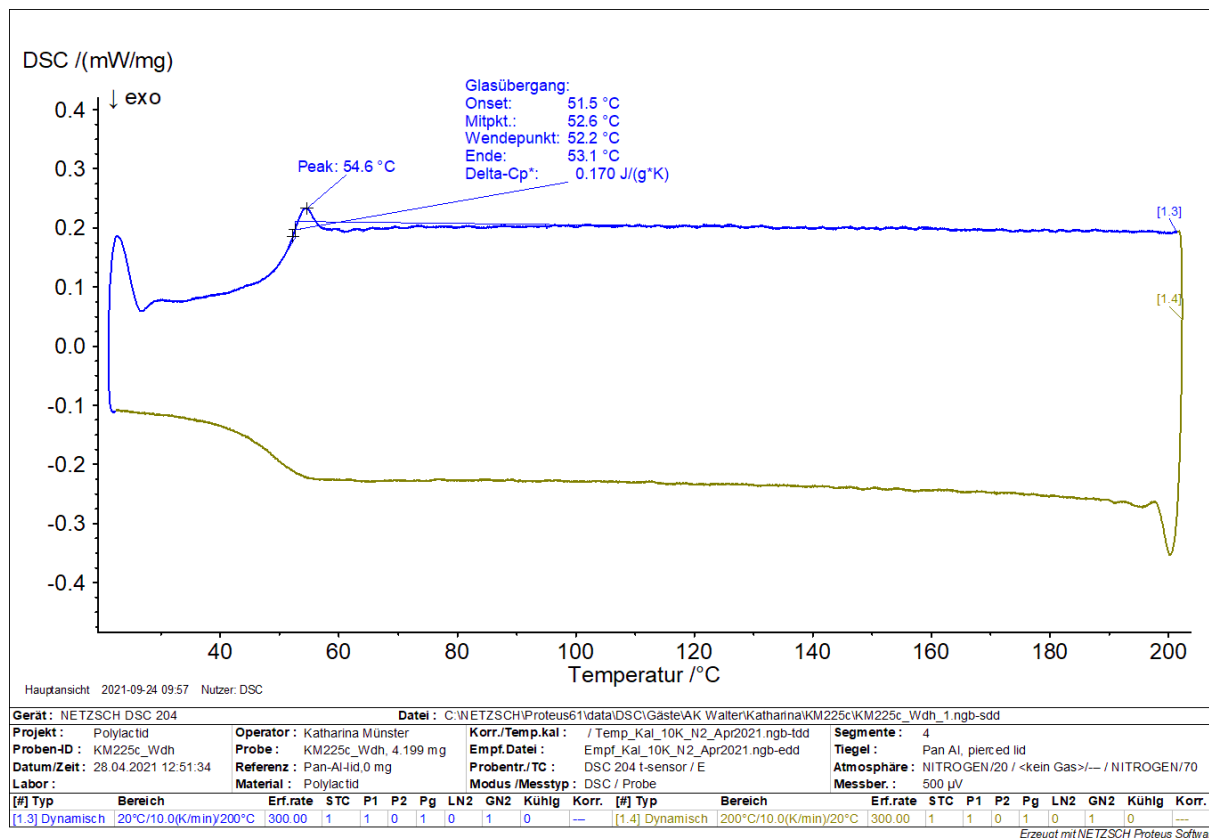

Figure S79. DSC thermogram of poly(lactide) obtained from the polymerisation of *rac*-lactide by complex 2 at 30 °C.

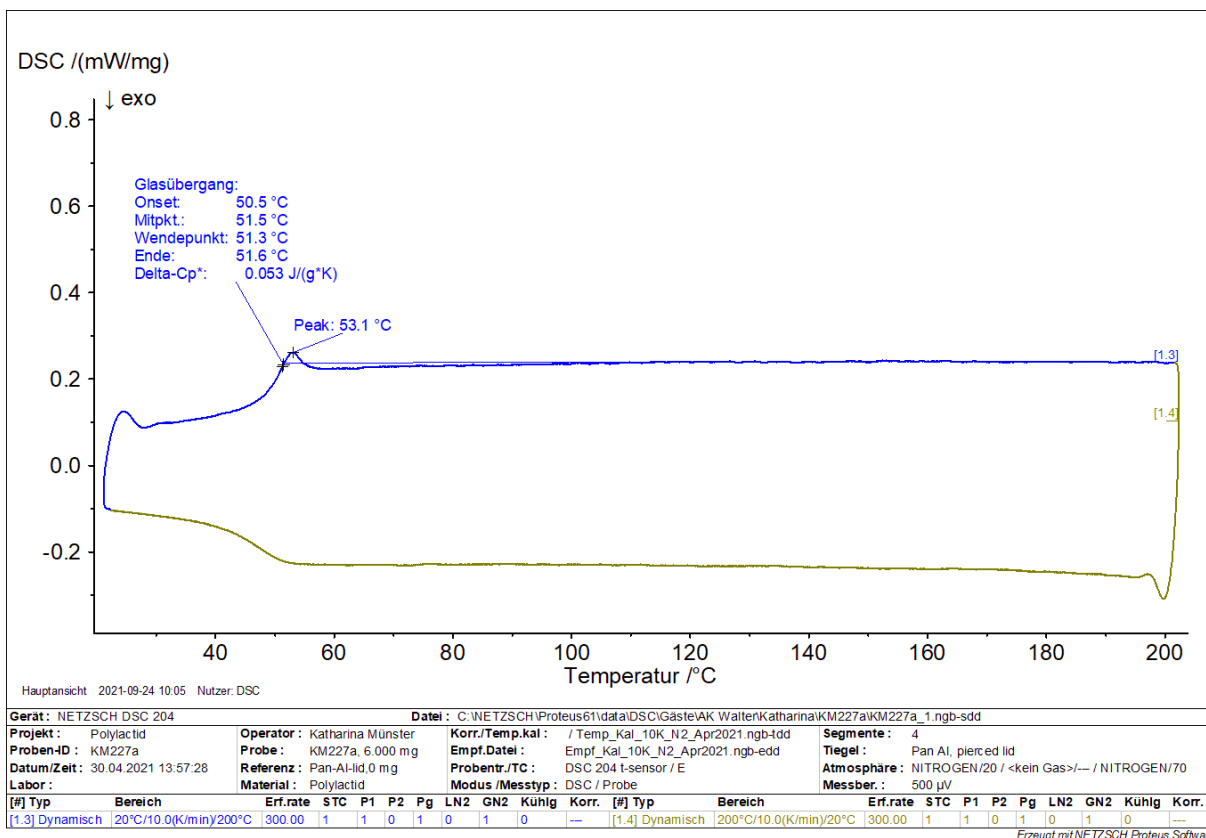

Figure S80. DSC thermogram of poly(lactide) obtained from the polymerisation of *rac*-lactide by complex 3.

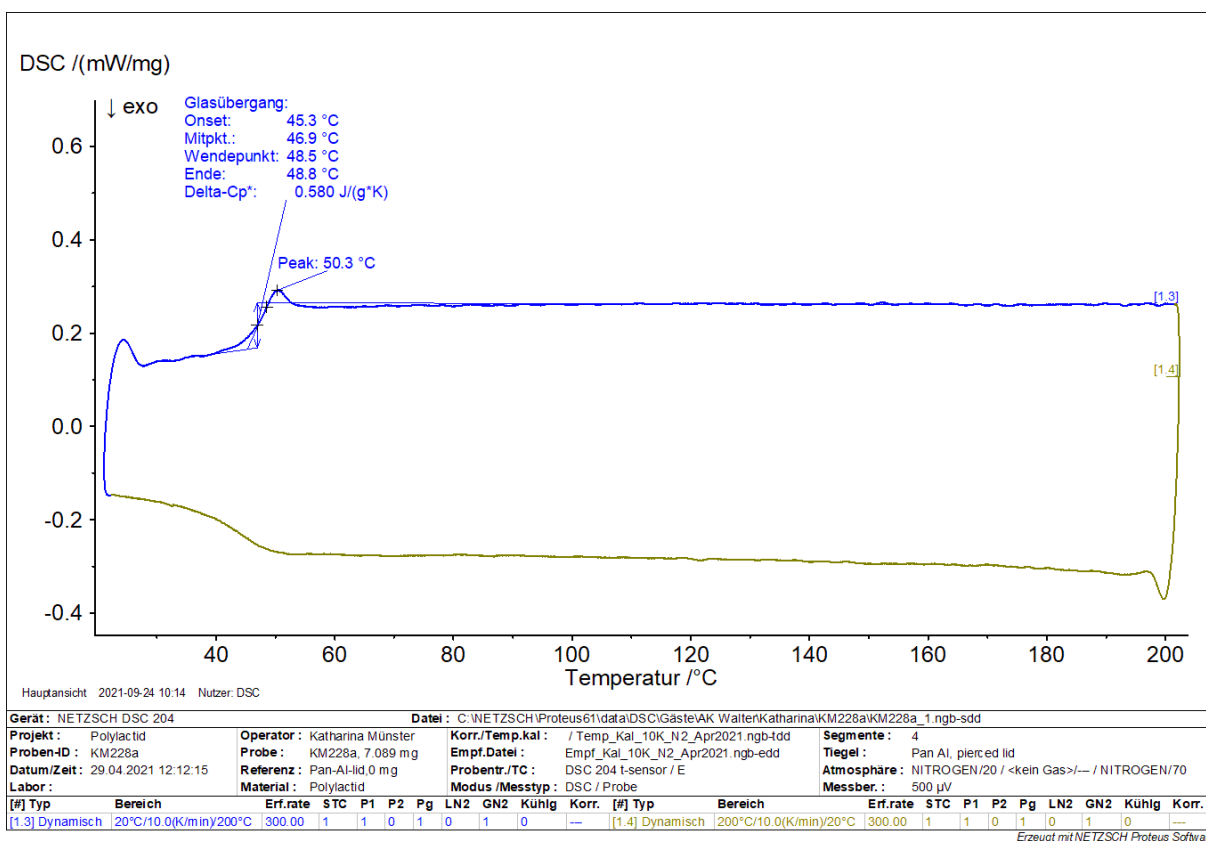

Figure S81. DSC thermogram of poly(lactide) obtained from the polymerisation of *rac*-lactide by complex 4.

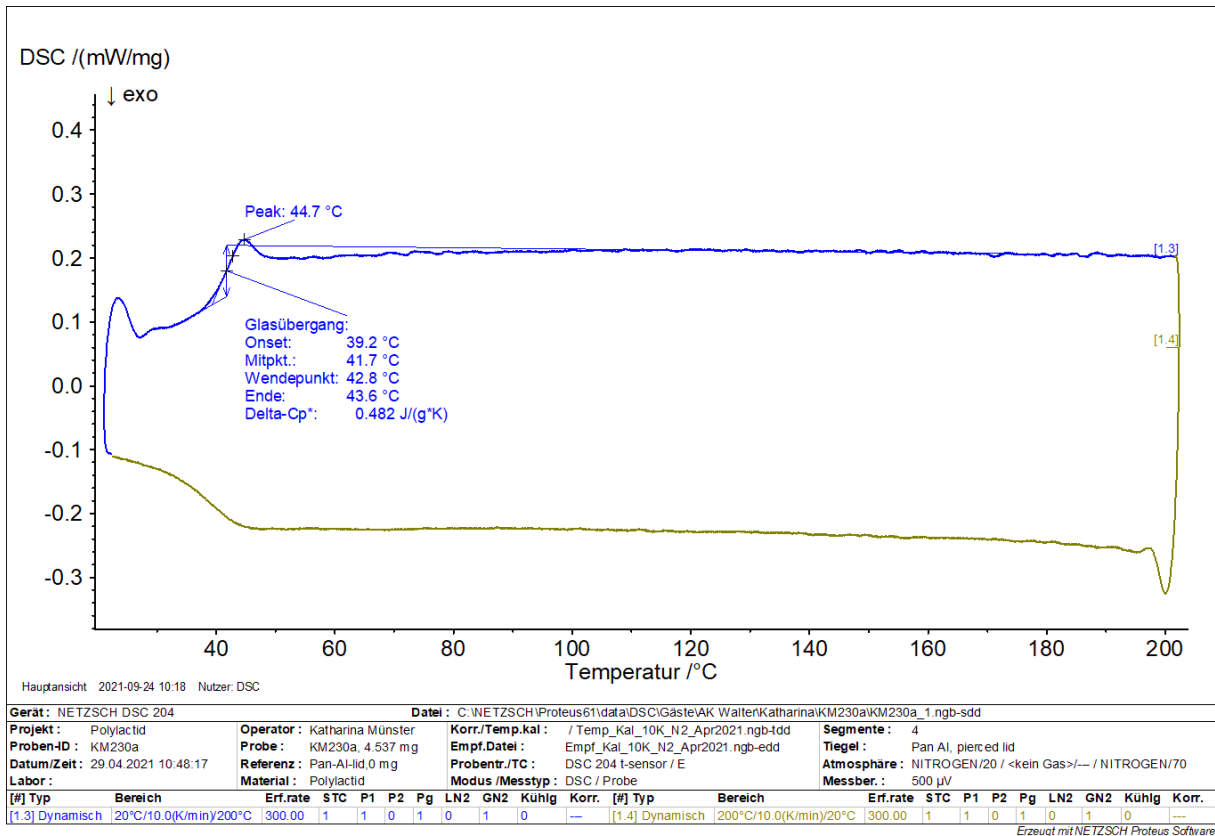

Figure S82. DSC thermogram of poly(lactide) obtained from the polymerisation of *rac*-lactide by complex 5.

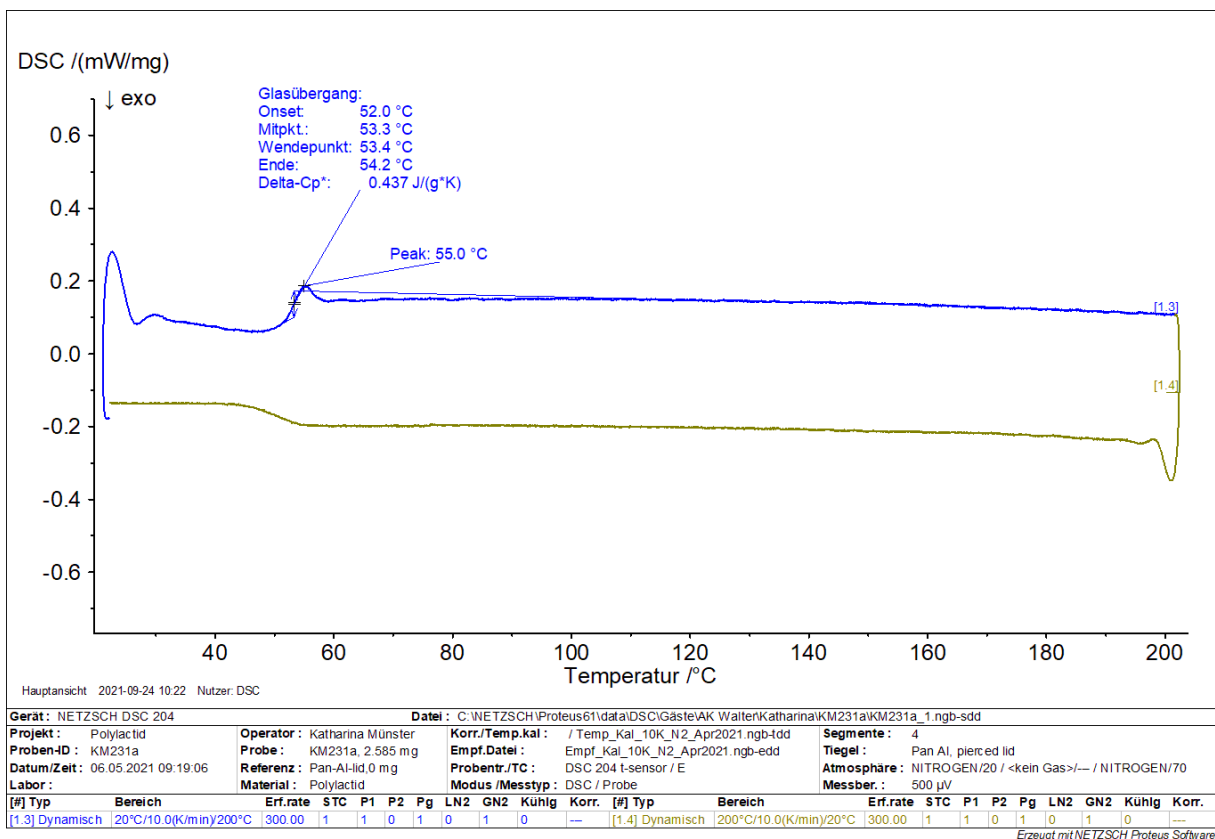

Figure S83. DSC thermogram of poly(lactide) obtained from the polymerisation of *rac*-lactide by complex 6.



## 6. References

- 1 J. Coudane, C. Ustariz-Peyret, G. Schwach and M. Vert, *J. Polym. Sci. A Polym. Chem.*, 1997, **35**, 1651–1658.
- 2 B. Orhan, M. J.-L. Tschan, A.-L. Wirotius, A. P. Dove, O. Coulembier and D. Taton, *ACS Macro Lett.*, 2018, **7**, 1413–1419.
- 3 H. R. Kricheldorf, C. Boettcher and K.-U. Tönnes, *Polymer*, 1992, **33**, 2817–2824.
- 4 K. A. M. Thakur, R. T. Kean, M. T. Zell, B. E. Padden and E. J. Munson, *Chem. Commun.*, 1998, 1913–1914
